# Supplementary material for: Differential roles of NaV1.2 and NaV1.6 in neocortical pyramidal cell excitability
Source: eLife. 2025 Jul 15;14:RP105696. doi: 10.7554/eLife.105696 (PMC12263156; doi:10.7554/eLife.105696)
Supplement: Figure 1—figure supplement 1—source data 1. [file elife-105696-fig1-figsupp1-data1.xlsx]

## Sheet: Figure 1-S1A
	Aged matched dataset (p25)		Baseline dataset from Fig 3
	Wildtype, no drug (n=6)	8a/2aSR/SR KI, no drug (=8)	Wildtype, no drug (n=12)	8a/2aSR/SR KI + GNE-4076 (n=11)	Wildtype + GNE-4076 (n=11)
	-42.83	-46.287	-40.233	-43.553	-43.067
	-41.7	-44.827	-43.46	-44.727	-48.24
	-41.113	-45.213	-44.24	-46.68	-38.087
	-43.53	-47.267	-45.8	-45.8	-45.313
	-43.117	-46.487	-44.827	-44.92	-41.407
	-43.163	-45.313	-43.26	-47.36	-40.14
		-45.313	-43.553	-42.673	-41.7
		-45.413	-42.48	-43.36	-43.653
			-39.06	-45.12	-43.167
			-39.553	-46.287	-41.507
			-42.38	-43.067	-40.233
			-41.507

## Sheet: Figure 1-S1B
	Aged matched dataset (p25)		Baseline dataset from Fig 3
	Wildtype, no drug (n=6)	8a/2aSR/SR KI, no drug (=8)	Wildtype, no drug (n=12)	8a/2aSR/SR KI + GNE-4076 (n=11)	Wildtype + GNE-4076 (n=11)
	599.33	571.33	571.17	605.5	534.67
	634.75	647	700.67	556.67	527.33
	513.92	573.67	503	573.67	661.5
	526.17	617.67	517.67	522.5	576.17
	604.25	546.83	520	576.17	481
	649.42	595.67	576.17	473.67	571.33
		634.83	590.83	488.33	556.67
		568.83	461.33	534.67	507.83
			515.17	515.17	554.17
			559.17	551.67	532.17
			598	598.17	595.83
			556.67
