# Supplementary material for: Differential roles of NaV1.2 and NaV1.6 in neocortical pyramidal cell excitability
Source: eLife. 2025 Jul 15;14:RP105696. doi: 10.7554/eLife.105696 (PMC12263156; doi:10.7554/eLife.105696)
Supplement: Figure 1—source data 1. [file elife-105696-fig1-data1.xlsx]

## Sheet: Figure 1D
Nav1.6 YW->SR mutant (n=6)
4076 conc (nM)	Aug27004	Aug27005	Aug27006	Aug27007	Aug27008	Aug27009		mean	SEM
0.01	1	1	1	1	1	1		1	0
100	--	--	--	--	--	--		--	--
300	--	--	--	--	--	--		--	--
1000	--	--	--	--	--	--		--	--
3000	--	--	--	--	--	--		--	--
10000	0.86211	0.90223	0.94385	0.92148	0.915	0.92155		0.91103	0.01123
30000	0.5265	0.70442	0.78749	0.71363	0.6965	0.6599		0.68141	0.03536
100000	0.308	0.49302	0.64547	0.50462	0.544	0.40737		0.48375	0.04727
Nav1.6 WT (n=8)
4076 conc (nM)	Aug220002	Aug220003	Aug220004	Aug22005	Aug23000	Aug230001	Aug230003	Aug230004		mean	SEM
0.01	1	1	1	1	1	1	1	1		1	0
100	0.51429	0.64015	0.92382	0.60769	0.25	0.88859	0.9049	0.90826		0.70471	0.0866
300	0.25929	0.17803	0.53516	0.08974	0.027	0.44226	0.64647	0.52977		0.33846	0.08148
1000	0.02857	0.06477	0.05521	0.0641	0	0.05978	0.10701	0.05045		0.05374	0.01089
3000
10000
30000
100000
Nav1.2 YW->SR (n=7)
4076 conc (nM)	Aug180002	Aug180004	Aug180005	Aug180005A	Aug180005B	Aug220003	Aug220004			mean	SEM
0.01	1	1	1	1	1	1	1			1	3.77981e-07
10	--	--	--	--	--					--	--
30	--	--	--	--	--					--	--
100	--	--	--	--	--					--	--
300	--	--	--	--	--					--	--
1000	0.50769	0.76015	0.60294	0.75258	0.6867	0.7223	0.698736			0.66201	0.04783
3000	0.22308	0.48524	0.33394	0.45361	0.38572	0.367	0.4134			0.37632	0.04648
10000	0.10256	0.09225	0.1702	0.1701	0.12173	0.153	0.14322			0.13137	0.01652
30000				0.05155	0.02619	0.034	0.041			0.03887	0.00802
100000				0	0	0	0			0	0
WT Nav1.2 (n=6)
4076 conc (nM)	Aug180001	Aug010001	Jul310000	Jul310002	Aug020002	Aug060007		mean	SEM
0.01	1	1	1	1	1	1			1	7.21108e-08
10	--	0.13835	0.19128	0.28546	0.14225	0.22561			0.19659	0.02509
30	--	0.02003	0.00513	0.04456	0.0433	0.00894			0.02439	0.00762
100	--	--	--	--	--	--			--	--
300	--	--	--	--	--	--			--	--
1000	0	2.82632e-08	3.93828e-07	-6.88357e-09	-8.95852e-08	1.95779e-09			5.45967e-08	6.97833e-08
3000	0								0	--
10000	0								0	--

## Sheet: Figure 1J
		Wildtype no drug (n=4 cells)						Wildtype + GNE-4076 (n=4 cells)						8a/2aSR/SR KI + GNE-4076 (n=4 cells)
	Time (sec)	Cell 1	Cell 2	Cell 3	Cell 4		Time (sec)	Cell 1	Cell 2	Cell 3	Cell 4		Time (sec)	Cell 1	Cell 2	Cell 3	Cell 4
	-30	0.979171	0.966908	0.984314	1.0745		-30		0.879094	1.0424	1.13794		-30	1.05018	1.09376	1.00172	1.01971
	-28	1.00241	1.04028	0.926886	0.99707		-28		0.918629	0.995662	1.05843		-28	0.996973	1.07542	0.930788	1.1642
	-26	1.0264	0.973972	0.977744	1.00227		-26		1.04832	0.996283	1.08403		-26	0.997172	1.07806	0.996216	1.08665
	-24	0.971287	0.907421	0.986793	0.961348		-24		1.10834	0.997438	0.979009		-24	1.01195	1.07888	1.04082	0.963346
	-22	0.996135	1.11617	0.995308	1.02254		-22		0.899091	0.99428	1.02265		-22	0.987036	1.0238	1.02575	1.07373
	-20	1.02427	1.12237	1.00622	1.07205		-20		1.06857	1.02081	0.963891		-20	1.05077	1.03284	1.00471	0.968674
	-18	0.992529	0.975792	0.963861	1.0416		-18	1.00702	1.14903	1.01636	0.917278		-18	0.953117	1.0135	0.983648	0.985106
	-16	1.00832	0.957925	1.07447	0.874461		-16	1.04008	0.969061	1.02174	0.93544		-16	0.956976	0.978771	1.00315	0.970315
	-14	1.0136	0.878216	1.05588	0.943307		-14	1.04604	0.995285	0.978655	0.946825		-14	0.991362	0.964141	0.864662	1.11664
	-12	0.985879	1.06095	1.02853	1.01085		-12	0.906856	0.964584	0.936369	0.954514		-12	1.00446	1.01074	0.908753	0.959262
	2	0.434546	0.547705	0.429456	0.252971		2	0.0386898	0.192367	0.280722	0.364287		2	0.507495	0.357728	0.300269	0.333624
	4	0.765302	0.834618	0.763551	0.596623		4	0.0480343	0.254066	0.0706931	0.39396		4	0.836833	0.696166	0.639049	0.623732
	6	0.864291	0.915478	0.951633	0.796378		6	0.0644192	0.264289	0.198359	0.432496		6	0.877844	0.735856	0.800159	0.744909
	8	0.922937	0.973287	0.899529	0.869192		8	0.171334	0.294275	0.25645	0.397393		8	0.975161	0.856246	0.845039	0.962742
	10	0.925089	0.845988	0.982454	0.79746		10	0.0540419	0.29359	0.229119	0.394416		10	0.97299	0.923382	0.935574	0.868361
	12	0.853693	0.840445	1.0303	0.865007		12	0.238762	0.204308	0.223866	0.389179		12	0.924413	0.945743	0.886658	0.907564
	14	0.872434	0.813021	0.967952	0.967482		14	0.118653	0.325692	0.263483	0.266154		14	1.01862	0.911575	0.915633	0.862806
	16	0.968257	0.768771	0.997744	0.896543		16	0.307963	0.455194	0.270872	0.483822		16	1.00707	0.96935	0.869129	0.915914
	18	0.856924	0.859723	1.03513	0.893801		18	0.333106	0.365237	0.192528	0.434687		18	0.913627	0.94197	0.860922	0.826855
	20	0.943241	0.732425	0.947419	0.944029		20	0.455818	0.395213	0.2532	0.427773		20	0.943847	0.947439	0.849052	0.804663
	22	0.882412	0.946812	0.955848	0.880883		22	0.369494		0.180331	0.268549		22	0.9806	0.922503	0.958011	0.940921
	24	0.875717	0.878074	1.00377	0.918986		24	0.460952		0.242027	0.291695		24	1.01972	0.929097	0.899045	0.925637
