# Supplementary material for: Differential roles of NaV1.2 and NaV1.6 in neocortical pyramidal cell excitability
Source: eLife. 2025 Jul 15;14:RP105696. doi: 10.7554/eLife.105696 (PMC12263156; doi:10.7554/eLife.105696)
Supplement: Figure 3—figure supplement 1—source data 1. [file elife-105696-fig3-figsupp1-data1.xlsx]

## Sheet: Figure 3-S1C
	Wildtype no drug (n=12 cells)	Wildtype + GNE-4076 (n=11 cells)	Scn8aSR/SR KI + GNE-4076 (n=11 cells)	Scn2aSR/SR KI + GNE-4076 (n=11 cells)	8a/2aSR/SR KI + GNE-4076 (n=11 cells)
	-16.498	-94.2332	-34.75	-64.9998	-6.5
	-2.87	-104.867	-9.17	-39.7525	-0.25
	-15.666	-79.5634	-27.8714	-48.7368	-1.94333
	-21.3725	-85.268	-31.802	-43.706	-11.45
	-25.7	-88.9034	-14.1657	-50.0175	-15.032
	-16.67	-81.9968	-14.7075	-56.1665	-27.828
	-21.6	-78.1366	-32.37	-36.915	-18.668
	-11.5664	-81.2966	-27.798	-57.2346	-14.336
	-15.138	-54.833	-2.7166	-63.4634	-26.564
	-16.8632	-85.9034	-23.5034	-84.4	-28.77
	-13.272	-54.8366	-26.804	-70.7634	-19.834
	-19.9374

## Sheet: Figure 3-S1D
	Wildtype, no drug control (n=12)
	Cell 1		Cell 2		Cell 3		Cell 4		Cell 5		Cell 6		Cell 7		Cell 8		Cell 9		Cell 10		Cell 11		Cell 12
	Time (sec)	D dV/dt (V/s)	Time (sec)	D dV/dt (V/s)	Time (sec)	D dV/dt (V/s)	Time (sec)	D dV/dt (V/s)	Time (sec)	D dV/dt (V/s)	Time (sec)	D dV/dt (V/s)	Time (sec)	D dV/dt (V/s)	Time (sec)	D dV/dt (V/s)	Time (sec)	D dV/dt (V/s)	Time (sec)	D dV/dt (V/s)	Time (sec)	D dV/dt (V/s)	Time (sec)	D dV/dt (V/s)
	-15	0	-15	0	-15	0	-15	0	-15	0	-15	0	-15	0	-15	0	-15	0	-15	0	-15	0	-15	0
	4	-105	2	-161.17	2	-97.67	2	-124.5	2	-129.33	4	-70.83	3	-56	2	-109.84	2	-171	2	-141.5	2	-149	2	-88
	6	-39	4	-119.5	4	-78.17	4	-75.66	4	-75.66	6	-58.67	5	-56.16	4	-82.84	4	-117.33	4	-144	4	-95.17	4	-48.84
	8	-41.5	6	-73.17	6	-65.84	6	-61	6	-58.83	8	-36.67	7	-43.83	6	-56	6	-102.67	6	-109.83	6	-80.5	6	-39.17
	10	-34.16	8	-58.67	8	-56.17	8	-48.83	8	-39.5	10	-31.67	9	-34.16	8	-43.84	8	-93	8	-56	8	-63.5	8	-24.5
	12	-22	10	-58.67	10	-53.67	10	-51.33	10	-56.16	12	-44	11	-36.66	10	-63.34	10	-102.5	10	-48.66	10	-63.5	10	-19.5
	14	-22	12	-58.83	12	-41.5	12	-51.16	12	-36.5	14	-36.67	13	-39	12	-46.34	12	-63.67	12	-32	12	-51.34	12	-16.67
	16	-31.66	14	-48.83	14	-24.33	14	-41.5	14	-24.66	16	-41.67	15	-48.83	14	-48.67	14	-66	14	-36.66	14	-51.34	14	-12.34
	18	-5	16	-41.5	16	-43.84	16	-44	16	-29.33	18	-27.33	17	-33.83	16	-41.5	16	-56.17	16	-21.83	16	-58.67	16	-22
	20	-31.66	18	-43.83	18	-19.5	18	-39	18	-7.16	20	-31.67	19	-39.16	18	-34.5	18	-41.67	18	-39	18	-39.17	18	-4.84
	39	-5	20	-44.17	20	-36.67	20	-34.16	20	-29.33	30	-22	21	-14.66	20	-40.17	29	-48.83	20	-26.83	20	-35	20	-9.84
	63	-4.83	34	-31.67	26	-26.84	41	-9.83	24	2.5	50	-2.33	23	-22	25	-36.5	54	17	34	-17	44	-2.5	35	-7.5
	95	4.84	49	-14.67	30	-12.34	73	-14.66	32	7.34	76	7.33	25	-14.66	49	9.83	94	21.83	58	-17	65	-14.67	54	17
	172	-7.33	69	-4.83	37	-9.67	130	-4.83	58	2.5	122	9.67	27	-4.83	113	17	169	-9.83	86	-12.16	91	12.33	84	12.16
	292	-29.33	167	-12.17	57	-7.17	271	-2.33	78	2.34	214	7.33	29	-17.16	196	-4.84	302	-12.33	164	-2.5	151	2.5	139	7.33
	413	7.34	262	-7.17	77	-14.67	457	-9.83			334	-17.17	31	-14.66	397	17.16	569	-19.5	371	-26.83	234	-12.34	184	14.66
			587	-19.5	78	12.16					424	-12.17	43	-9.66	561	17.16			578	-14.66	448	24.33
													73	-22							560	-24.34
													93	-12.16
													113	-9.83
													133	-22
	Wildtype + GNE-4076 (n=11)
	Cell 1		Cell 2		Cell 3		Cell 4		Cell 5		Cell 6		Cell 7		Cell 8		Cell 9		Cell 10		Cell 11
	Time (sec)	D dV/dt (V/s)	Time (sec)	D dV/dt (V/s)	Time (sec)	D dV/dt (V/s)	Time (sec)	D dV/dt (V/s)	Time (sec)	D dV/dt (V/s)	Time (sec)	D dV/dt (V/s)	Time (sec)	D dV/dt (V/s)	Time (sec)	D dV/dt (V/s)	Time (sec)	D dV/dt (V/s)	Time (sec)	D dV/dt (V/s)	Time (sec)	D dV/dt (V/s)
	-15	0	-15	0	-15	0	-15	0	-15	0	-15	0	-15	0	-15	0	-15	0	-15	0	-15	0
	2	-288	2	-290.5	2	-202.67	2	-261.837	4	-246.67	2	-268.667	2	-214.997	2	-244.003	2	-224.83	4	-283.167	2	-236.833
	4	-288	4	-290.5	4	-180.5	4	-205.67	6	-236.837	4	-256.5	4	-195.83	4	-227.003	4	-166.33	6	-275.833	4	-234.333
	6	-288	6	-290.5	6	-170.84	6	-193.503	8	-229.503	6	-241.833	6	-195.33	6	-202.67	6	-164	8	-254	6	-214.833
	8	-288	8	-261.167	8	-151.34	8	-186	10	-207.67	8	-236.833	8	-178.163	8	-190.34	8	-156.5	10	-253.833	8	-187.833
	10	-288	10	-258.667	10	-170.84	10	-164	12	-210.003	10	-244.167	10	-173.33	10	-188	10	-146.83	12	-227.167	10	-185.5
	12	-234.333	12	-244.167	12	-144	12	-166.67	14	-197.837	12	-205.167	12	-165.997	12	-180.84	12	-139.33	14	-246.5	12	-165.83
	14	-202.667	14	-239.167	14	-146.5	14	-149.5	16	-207.503	14	-202.833	14	-163.497	14	-183.17	14	-149.16	16	-205	14	-165.83
	16	-202.5	16	-241.667	16	-136.67	16	-139.84	18	-195.503	16	-202.667	16	-141.497	16	-166	16	-141.83	18	-202.67	16	-159.83
	18	-202.5	18	-232	18	-136.67	18	-142.17	20	-180.67	18	-185.67	18	-141.497	18	-163.5	18	-134.66	20	-205.17	18	-136.67
	20	-192.833	20	-244.167	20	-141.5	20	-125	34	-139.17	20	-185.67	20	-127	20	-161.17	20	-127.16	52	-144	20	-141.5
	22	-180.67	22	-234.333	22	-117.17	30	-103	65	-112.34	40	-110	32	-119.66	40	-112.17	43	-102.83	134	-66	44	-73.17
	26	-170.83	26	-207.5	28	-97.5	50	-86	129	-85.5	62	-68.5	57	-48.83	64	-85.5	68	-71.16	305	-58.67	95	-31.67
	30	-173.17	30	-195.333	38	-85.34	67	-78.67	219	-53.84	106	-34.33	98	-19.5	96	-31.67	94	-44.16	425	-51.33	198	-7.33
	34	-173.17	34	-200.167	48	-53.67	97	-32.34	373	-41.5	166	-22	143	-22	171	-22	118	-44.16			379	0.17
	38	-173.17	38	-197.833	58	-36.67	142	-10.34	493	-31.84	290	-7.5	208	-17	269	-24.34	181	-44.16			594	-2.33
	42	-163.5	42	-188	88	-26.84	199	19			414	7.17	323	2.5	369	-14.67	307	-22.16
	56	-158.67	53	-175.83	108	-14.67	319	19			534	17	443	12.17	489	-21.84	458	-22.33
	76	-136.67	63	-134.83	138	22	387	-20.17			615	0			549	-24.34
	96	-109.67	83	-117.17	198	-4.84	507	-22.5
	116	-92.67	93	-95.17	228	7.5
	136	-83	113	-85.5
	176	-68.17	152	-61
	236	-53.67	182	-48.83
	296	-43.83	212	-34.17
	356	-29.33	242	-31.67
	446	-36.5	302	-22
	596	-22	362	-21.83
			422	-24.5
			482	-29.33
	Scn8aSR/SR KI + GNE-4076 (n=11)
	Cell 1		Cell 2		Cell 3		Cell 4		Cell 5		Cell 6		Cell 7		Cell 8		Cell 9		Cell 10		Cell 11
	Time (sec)	D dV/dt (V/s)	Time (sec)	D dV/dt (V/s)	Time (sec)	D dV/dt (V/s)	Time (sec)	D dV/dt (V/s)	Time (sec)	D dV/dt (V/s)	Time (sec)	D dV/dt (V/s)	Time (sec)	D dV/dt (V/s)	Time (sec)	D dV/dt (V/s)	Time (sec)	D dV/dt (V/s)	Time (sec)	D dV/dt (V/s)	Time (sec)	D dV/dt (V/s)
	-15	0	-15	0	-15	0	-15	0	-15	0	-15	0	-15	0	-15	0	-15	0	-15	0	-15	0
	3	-126.92	3	-135.58	3	-90.33	2	-166.16	3	-166	2	-136.67	4	-144.17	2	-190.337	4	-114.83	2	-124.5	2	-168.5
	8	-109.84	8	-111.16	5	-90.17	4	-119.66	5	-153.66	4	-129.5	6	-122	4	-112.34	6	-102.67	4	-88	4	-122.16
	13	-96.42	13	-97.75	7	-87.83	6	-110	7	-129.33	6	-116	8	-114.84	6	-104.84	8	-97.83	6	-75.83	6	-105.16
	18	-80.59	18	-90.41	9	-87.83	8	-100.16	9	-129.5	8	-114.67	10	-102.5	8	-100	10	-90.33	8	-78.17	8	-102.66
	23	-72.09	23	-89.16	11	-75.5	10	-105.16	11	-124.5	10	-109.83	12	-97.67	10	-95.17	12	-87.83	10	-68.33	10	-105
	28	-68.34	28	-81.83	13	-75.67	12	-92.83	13	-122	12	-109.83	14	-90.34	12	-75.5	14	-78.17	12	-66	12	-90.33
	33	-65.92	33	-79.41	15	-75.67	14	-85.66	15	-109.83	14	-105	16	-92.84	14	-80.34	16	-78.17	14	-65.83	14	-83
	38	-62.25	38	-76.91	17	-73.17	16	-90.5	17	-105	16	-102.5	18	-80.67	16	-73.17	18	-68.33	16	-63.33	16	-85.5
	43	-70.75	43	-73.33	19	-65.83	18	-87.83	19	-109.5	18	-105	20	-73.34	18	-73.17	20	-68.33	18	-61	18	-88
	48	-62.25	48	-73.33	21	-73.17	20	-78.33	21	-95	24	-83	29	-65.84	20	-73.17	30	-63.67	20	-61.17	20	-88
	53	-58.59	53	-70.91	23	-60.83	22	-75.83	25	-90.33	28	-80.5	40	-53.67	47	-34.17	46	-48.83	30	-46.33	28	-53.66
	58	-67.17	58	-76.91	25	-51.17	30	-78.33	29	-70.83	33	-70.67	59	-46.5	109	-2.34	71	-24.5	42	-36.67	42	-58.83
	63	-54.92	63	-79.41	27	-56.17	38	-70.83	39	-88	38	-61	83	-24.5	219	-7.17	102	-24.5	70	-27	67	-44.16
	68	-54.92	68	-80.66	29	-56	44	-71	49	-80.5	43	-65.83	109	-26.84	433	-2.34	162	-7.5	89	-31.67	98	-29.33
	73	-67.09	73	-69.58	31	-51.17	60	-46.5	73	-92.66	58	-48.83	141	-24.5	532	12.16	300	-7.33	134	-19.5	143	-34.33
	78	-58.59	78	-78.16	45	-53.67	70	-51.5	103	-75.66	73	-41.33	209	-26.84	592	-2.34	420	-2.5	227	-5	251	0
	83	-53.67	83	-80.58	61	-48.67	90	-34.16	123	-70.83	88	-26.83	299	-14.84					400	-5	436	-14.83
	88	-73.25	88	-76.91	92	-43.83	120	-46.5	143	-73.16	98	-29.17	452	-22					460	-7.33	496	-12.33
	93	-64.75	123	-72.08	102	-53.5	180	-31.83	163	-53.66	128	-26.83	532	-4.84
			178	-67.16	122	-46.17	300	-24.5			158	-17
					132	-46.33					188	-4.83
					172	-46.33					218	-26.83
					210	-46.33					248	-2.5
					300	-38.83					278	-14.67
					430	-43.83					308	-31.67
											350	-19.5
											362	-24.33
											421	-17
											481	-2.5
											541	-24.33
	Scn2aSR/SR KI + GNE-4076 (n=11)
	Cell 1		Cell 2		Cell 3		Cell 4		Cell 5		Cell 6		Cell 7		Cell 8		Cell 9		Cell 10		Cell 11
	Time (sec)	D dV/dt (V/s)	Time (sec)	D dV/dt (V/s)	Time (sec)	D dV/dt (V/s)	Time (sec)	D dV/dt (V/s)	Time (sec)	D dV/dt (V/s)	Time (sec)	D dV/dt (V/s)	Time (sec)	D dV/dt (V/s)	Time (sec)	D dV/dt (V/s)	Time (sec)	D dV/dt (V/s)	Time (sec)	D dV/dt (V/s)	Time (sec)	D dV/dt (V/s)
	-15	0	-15	0	-15	0	-15	0	-15	0	-15	0	-15	0	-15	0	-15	0	-15	0	-15	0
	4	-161.33	2	-192.833	2	-119.67	2	-153.837	2	-103.75	2	-141.66	2	-133	2	-150.17	2	-153.84	2	-207.503	2	-246.503
	6	-129.33	4	-183.167	4	-95.17	4	-129.5	4	-102.58	4	-114.75	4	-109.83	4	-119.59	4	-124.5	4	-141.5	4	-190.337
	8	-114.66	6	-136.67	6	-92.67	6	-109.84	6	-80.67	6	-109.91	8	-98.92	6	-98.92	6	-114.84	6	-112.34	6	-175.67
	10	-124.497	8	-110	8	-65.84	8	-105	8	-89.08	10	-95.25	13	-86.67	9	-90.25	8	-105	8	-131.84	8	-163.5
	12	-95.16	10	-122.17	10	-56.17	10	-102.67	10	-74.5	12	-78.16	15	-85.42	13	-100.09	10	-80.5	10	-127	10	-161
	14	-97.66	12	-110	13	-56	12	-100.17	12	-83	15	-98.91	17	-89.08	15	-94	12	-85.34	12	-87.84	12	-158.5
	16	-85.5	14	-100.17	15	-58.67	14	-95.34	14	-58.58	17	-75.66	19	-81.75	17	-90.34	14	-75.84	14	-114.67	14	-165.84
	18	-80.66	16	-88	17	-46.34	16	-85.5	16	-72.08	19	-69.58	27	-65.92	19	-76.92	16	-78.17	16	-92.84	16	-180.5
	20	-78.16	18	-95.33	19	-51.34	18	-75.67	18	-67.08	23	-62.25	31	-64.67	48	-65.84	18	-85.5	18	-95.17	18	-141.5
	28	-70.83	20	-100.17	23	-41.5	20	-73.17	20	-53.75	39	-29.33	37	-75.67	58	-78.09	20	-70.84	20	-90.34	20	-122
	50	-22	22	-105	30	-31.67	22	-68.34	31	-56.17	48	-45.25	43	-46.42	78	-68.34	30	-53.67	29	-68.34	46	-85.34
	65	-29.33	27	-88	36	-46.34	24	-70.84	39	-52.5	68	-30.5	73	-40.25	93	-46.42	54	-36.5	47	-46.34	109	-29.17
	118	0	35	-66	65	-14.67	27	-92.84	58	-47.58	138	-11	138	-22	193	-63.42	80	-19.5	72	-51.17	226	-2.34
	178	-7.5	51	-68.33	95	-19.5	28	-58.5	88	-13.42	198	-28.08	228	-4.83	343	-54.92	104	2.5	93	-19.5	316	-17
	276	4.84	69	-58.67	125	-24.5	58	-31.67	138	-18.25			288	-14.58			155	0	155	-2.34	443	-4.67
	320	24.34	87	-66	155	-5	88	-39.17	258	-3.67			408	-1.17			275	-12.17	240	0	607	-4.67
	551	-2.5	89	-73.17	185	0	128	-26.84	348	-8.5							335	-5	342	4.83
	581	12.17	94	-58.67			158	-5									425	-12.17	462	12.16
			124	-46.33			188	-5									485	-5
			154	-56.33			218	-12.34									647	-12.34
			184	-34.17
			214	-17.17
	8a/2aSR/SR KI + GNE-4076 (n=10)
	Cell 1		Cell 2		Cell 3		Cell 4		Cell 5		Cell 6		Cell 7		Cell 8		Cell 9		Cell 10
	Time (sec)	D dV/dt (V/s)	Time (sec)	D dV/dt (V/s)	Time (sec)	D dV/dt (V/s)	Time (sec)	D dV/dt (V/s)	Time (sec)	D dV/dt (V/s)	Time (sec)	D dV/dt (V/s)	Time (sec)	D dV/dt (V/s)	Time (sec)	D dV/dt (V/s)	Time (sec)	D dV/dt (V/s)	Time (sec)	D dV/dt (V/s)
	-15	0	-15	0	-15	0	-15	0	-15	0	-15	0	-15	0	-15	0	-15	0	-15	0
	2	-58.5	2	-51.33	2	-61	2	-131.83	2		2	-109.84	4	-61.16	2	-92.83	2	-119.66	2	-158.67
	4	-58.5	6	-48.83	6	-31.66	4	-75.66	4	-114.67	4	-87.84	6	-58.66	4	-53.83	4	-78.16	4	-102.5
	6	-36.5	10	-17	10	-36.66	6	-61	6	-102.67	6	-56	8	-53.83	6	-48.83	6	-48.83	6	-80.5
	8	-34	14	-19.66	14	-22	8	-63.5	8	-102.5	8	-51.17	10	-36.83	8	-34.33	8	-53.66	8	-73.17
	10	-24.34	18	-26.83	18	-4.83	10	-63.5	10	-70.67	12	-39	12	-39.16	10	-41.66	10	-48.83	10	-80.5
	12	-21.84	30	-14.66	30	-12.16	12	-42.5	12	-78.17	14	-24.5	14	-27	12	-12.16	12	-44	12	-61
	14	-24.34	54	-19.5	42	0	14	-44	14	-78.17	16	-31.67	16	-22	14	-24.5	14	-34.33	14	-58.67
	16	-24.5	70	-4.83	59	-14.66	16	-34.16	16	-63.5	18	-31.67	18	-26.83	16	-5	16	-34.16	16	-56.17
	18	-24.17	90	-4.83	109	5	18	-46.33	18	-53.67	20	-29.17	20	-34.16	18	-19.66	18	-36.66	18	-53.67
	20	-24.34	110	-22	149	-7.33	20	-41.5	20	-53.84	40	-14.5	40	-14.66	20	-9.83	20	-26.83	20	-65.83
	22	-43.84	172	-12.33	179	-2.33	40	-21.83	35	-12.34	65	-12	71	-5	27	7.17	27	-34.16	41	-68.33
	33	-9.5	232	-22	205	-2.5	82	-26.83	69	-19.67	119	5	184	-19.5	48	36.5	41	-46.5	91	-90.33
	53	-4.67			235	0.17	183	-7.33	143	-41.5	194	9.83	288	-17.16	91	-0.16	61	-27	171	-34.17
	73	-9.67			265	9.84	273	-14.66	243	-48.84	318	-7.17	408	-26.83	154	0	136	-27	343	-19.5
	93	5					398	-12.33	332	-53.67	552	44	528	-27	274	-7.5	255	-12.33	523	-24.5
	153	0							464	-53.67					475	-5	345	-22	643	-4.83
	213	-14.5															408	-22
	273	-19.5															588	-12.16
	333	-21.84
	363	-14.5
	393	-2.34

## Sheet: Figure 3-S1E
	Wildtype no drug (n=12 cells)	Wildtype + GNE-4076 (n=11 cells)	Scn8aSR/SR KI + GNE-4076 (n=11 cells)	Scn2aSR/SR KI + GNE-4076 (n=11 cells)	8a/2aSR/SR KI + GNE-4076 (n=11 cells)
	-33.168	-206.967	-88.505	-98.734	-23.838
	-25.396	-240.234	-94.08	-53.0875	-3.58
	-36.268	-141.068	-72.702	-79.07	-21.1633
	-40.205	-144.636	-87.03	-66.898	-21.1633
	-42.236	-198.303	-111.582	-80.5775	-31.202
	-56.8775	-196.401	-105.582	-85.73	-29.83
	-47.104	-147.898	-86.972	-90.3375	-14.23
	-13.138	-170.936	-75.07	-79.138	-35.196
	-41.964	-138.428	-76.166	-87.428	-59.068
	-22.464	-217.301	-63.466	-96.172	-41.698
	-31.264	-153.932	-86.966	-153.668	-65.47
	-47.432
