# Supplementary material for: Differential roles of NaV1.2 and NaV1.6 in neocortical pyramidal cell excitability
Source: eLife. 2025 Jul 15;14:RP105696. doi: 10.7554/eLife.105696 (PMC12263156; doi:10.7554/eLife.105696)
Supplement: Figure 3—figure supplement 2—source data 1. [file elife-105696-fig3-figsupp2-data1.xlsx]

## Sheet: Figure 3-S2A
	Wildtype, no drug control (n=12)
	Cell 1		Cell 2		Cell 3		Cell 4		Cell 5		Cell 6		Cell 7		Cell 8		Cell 9		Cell 10		Cell 11		Cell 12
	Time (sec)	Threshold (mV)	Time (sec)	Threshold (mV)	Time (sec)	Threshold (mV)	Time (sec)	Threshold (mV)	Time (sec)	Threshold (mV)	Time (sec)	Threshold (mV)	Time (sec)	Threshold (mV)	Time (sec)	Threshold (mV)	Time (sec)	Threshold (mV)	Time (sec)	Threshold (mV)	Time (sec)	Threshold (mV)	Time (sec)	Threshold (mV)
	4	-40.04	2	-36.913	2	-39.747	2	-35.74	2	-43.947	4	-44.627	3	-48.34	2	-44.727	2	-43.847	2	-42.873	2	-44.533	2	-41.407
	6	-40.233	4	-40.92	4	-38.087	4	-36.62	4	-44.333	6	-44.827	5	-47.947	4	-45.507	4	-44.92	4	-43.753	4	-44.727	4	-42.873
	8	-40.627	6	-41.213	6	-39.26	6	-37.893	6	-44.14	8	-45.213	7	-48.147	6	-45.507	6	-44.827	6	-42.48	6	-43.947	6	-42.773
	10	-40.333	8	-41.013	8	-39.453	8	-39.16	8	-43.853	10	-44.827	9	-48.147	8	-45.7	8	-44.04	8	-42.287	8	-44.533	8	-43.167
	12	-40.14	10	-40.82	10	-39.06	10	-38.867	10	-44.14	12	-45.02	11	-48.047	10	-45.12	10	-44.24	10	-42.287	10	-44.24	10	-42.673
	14	-40.04	12	-41.213	12	-40.333	12	-38.38	18	-44.04	14	-44.727	13	-47.36	12	-44.92	12	-43.653	12	-42.673	12	-43.947	12	-42.967
	16	-40.427	14	-41.407	16	-40.92	14	-39.06	24	-43.847	16	-44.827	15	-47.267	14	-45.12	14	-43.36	14	-42.673	14	-44.333	14	-42.287
	18	-40.92	16	-41.8	20	-38.767	16	-39.06	32	-44.24	18	-44.92	17	-47.073	16	-44.727	16	-43.553	16	-42.187	16	-44.14	16	-42.58
	20	-39.747	18	-41.6	26	-39.353	18	-40.14	58	-44.727	20	-44.92	19	-47.267	18	-45.02	18	-43.36	18	-42.58	18	-43.847	18	-42.58
	39	-40.333	20	-40.92	30	-39.847	20	-38.28	78	-44.827	30	-44.727	21	-47.56	20	-45.213	29	-43.847	20	-42.38	20	-44.333	20	-42.773
	63	-40.627	34	-41.213	37	-40.233	41	-39.16			50	-45.02	23	-47.36	25	-45.12	54	-43.167	34	-42.58	44	-43.847	35	-42.287
	95	-40.427	49	-41.507	57	-39.353	73	-38.473			76	-44.727	25	-47.267	49	-44.433	94	-43.26	58	-42.873	65	-43.847	54	-42.967
	172	-41.507	69	-40.82	77	-40.627	130	-40.04			122	-45.413	27	-46.87	113	-43.947	169	-41.993	86	-43.26	91	-43.753	84	-43.067
	292	-41.507	167	-40.82	78	-41.6	271	-40.82			214	-44.333	29	-46.873	196	-43.553	302	-42.58	164	-42.773	151	-43.653	139	-42.773
	413	-42.773	262	-40.92			457	-41.6			334	-45.02	31	-47.267	397	-43.753	569	-43.26	371	-43.067	234	-43.36	184	-42.287
			587	-41.893							424	-44.533	43	-46.487	561	-44.24			578	-43.067	448	-43.36
													73	-47.073							560	-43.167
													93	-46.193
													113	-45.993
													133	-46.68
	Wildtype + GNE-4076 (n=11)
	Cell 1		Cell 2		Cell 3		Cell 4		Cell 5		Cell 6		Cell 7		Cell 8		Cell 9		Cell 10		Cell 11
	Time (sec)	Threshold (mV)	Time (sec)	Threshold (mV)	Time (sec)	Threshold (mV)	Time (sec)	Threshold (mV)	Time (sec)	Threshold (mV)	Time (sec)	Threshold (mV)	Time (sec)	Threshold (mV)	Time (sec)	Threshold (mV)	Time (sec)	Threshold (mV)	Time (sec)	Threshold (mV)	Time (sec)	Threshold (mV)
	2	-24.413	2	-18.847	2	-26.267	2	-26.66	4	-26.56	2	-15.92	2	-20.993	2	-29.3	2	-25.587	4	-22.56	2	-17.48
	4	-28.42	4	-25	4	-26.173	4	-34.473	6	-26.853	4	-20.8	4	-24.313	4	-29.1	4	-30.373	6	-23.047	4	-21.78
	6	-27.64	6	-25.78	6	-28.613	6	-34.573	8	-26.467	6	-23.34	6	-24.513	6	-29.493	6	-31.833	8	-25.1	6	-23.633
	8	-28.807	8	-26.173	8	-28.42	8	-37.207	10	-27.147	8	-24.9	8	-26.267	8	-30.667	8	-31.447	10	-25.1	8	-25.487
	10	-28.127	10	-27.927	10	-28.22	10	-35.253	12	-28.713	10	-25.487	10	-26.66	10	-31.347	10	-31.447	12	-25.587	10	-26.467
	12	-29.3	14	-28.613	12	-29.98	12	-36.913	14	-28.713	12	-26.467	12	-27.347	12	-32.327	12	-32.327	14	-25.293	12	-26.56
	14	-29.687	18	-27.733	14	-30.373	14	-36.327	16	-28.32	14	-25.78	14	-27.347	14	-31.153	14	-32.127	16	-25.587	14	-28.42
	16	-29.493	22	-29.493	18	-30.567	16	-37.307	18	-29.98	16	-26.66	16	-28.513	16	-33.107	16	-33.007	18	-25.193	16	-28.513
	18	-28.807	26	-29.88	22	-30.96	18	-37.6	20	-29.687	18	-27.833	18	-28.713	18	-34.28	18	-33.4	20	-25.973	18	-28.027
	20	-30.467	30	-31.153	28	-32.033	20	-38.187	34	-32.913	20	-28.22	20	-30.273	20	-33.887	20	-34.28	52	-32.127	20	-28.907
	22	-30.08	34	-31.447	38	-31.64	30	-39.747	65	-36.033	40	-33.887	32	-31.64	40	-35.447	43	-34.86	134	-36.72	44	-33.693
	26	-31.833	38	-32.327	48	-35.153	50	-41.113	129	-39.747	62	-36.327	57	-35.447	64	-39.847	68	-38.673	305	-39.647	95	-38.087
	30	-31.447	42	-30.467	58	-36.133	67	-42.773	219	-39.453	106	-39.353	98	-39.26	96	-42.873	94	-40.14	425	-37.987	198	-39.747
	34	-30.373	53	-32.127	88	-37.207	97	-43.167	373	-40.72	166	-40.427	143	-40.72	171	-43.753	118	-40.72			379	-40.04
	38	-31.64	63	-37.107	108	-37.6	142	-44.92	493	-41.507	290	-41.113	208	-41.013	269	-44.727	181	-41.993			594	-41.013
	42	-33.887	83	-42.38	138	-38.1	199	-45.607			414	-41.013	323	-41.8	369	-44.627	307	-44.04
	56	-33.493	93	-42.873	198	-39.553	319	-45.12			534	-41.6	443	-41.8	489	-44.533	458	-43.847
	76	-34.28	113	-44.533	228	-39.647	387	-45.213			615	-41.6			549	-44.92
	96	-35.74	152	-46.973			507	-44.92
	116	-36.62	182	-47.753
	136	-38.767	212	-47.753
	176	-39.747	242	-48.533
	236	-40.92	302	-49.12
	296	-41.307	362	-50.193
	356	-41.203	422	-50.293
	446	-41.8	482	-49.9
	596	-41.893
	Scn8aSR/SR KI + GNE-4076 (n=11)
	Cell 1		Cell 2		Cell 3		Cell 4		Cell 5		Cell 6		Cell 7		Cell 8		Cell 9		Cell 10		Cell 11
	Time (sec)	Threshold (mV)	Time (sec)	Threshold (mV)	Time (sec)	Threshold (mV)	Time (sec)	Threshold (mV)	Time (sec)	Threshold (mV)	Time (sec)	Threshold (mV)	Time (sec)	Threshold (mV)	Time (sec)	Threshold (mV)	Time (sec)	Threshold (mV)	Time (sec)	Threshold (mV)	Time (sec)	Threshold (mV)
	3	-42.09	3	-47.267	3	-44.92	2	-41.113	3	-44.24	2	-41.7	4	-49.027	2	-40.647	4	-46.387	2	-41.7	2	-44.533
	8	-42.333	8	-46.827	5	-44.827	4	-42.967	5	-42.773	4	-41.993	6	-49.12	4	-43.167	6	-46.487	4	-43.753	4	-45.12
	13	-42.287	13	-46.437	7	-44.627	6	-42.773	7	-42.38	6	-41.113	8	-48.533	6	-43.26	8	-45.9	6	-43.847	6	-45.12
	18	-42.14	18	-45.9	9	-44.533	8	-42.673	9	-41.407	8	-41.8	10	-48.24	8	-43.167	10	-45.413	8	-43.36	8	-45.12
	23	-41.747	23	-46.68	11	-44.827	10	-42.673	11	-41.8	10	-41.8	12	-47.653	10	-43.067	12	-45.313	10	-43.46	10	-44.727
	28	-41.893	28	-46.29	13	-44.727	12	-42.673	13	-41.6	12	-42.38	14	-47.853	12	-43.553	14	-45.02	12	-43.46	12	-44.04
	33	-41.797	33	-46.24	15	-44.92	14	-43.553	15	-41.307	14	-41.507	16	-47.853	14	-42.773	16	-44.827	14	-43.36	14	-43.847
	38	-41.893	38	-45.947	17	-44.727	16	-42.873	17	-41.407	16	-41.6	18	-48.44	16	-42.38	18	-45.7	16	-43.36	16	-44.433
	43	-41.113	43	-45.947	19	-44.24	18	-42.773	21	-41.993	18	-41.7	20	-48.147	18	-42.773	20	-45.213	18	-44.04	18	-44.433
	48	-41.357	48	-46.043	21	-44.92	20	-43.36	25	-40.333	24	-41.407	29	-48.633	20	-42.58	30	-45.7	20	-43.947	20	-44.04
	53	-41.65	53	-45.507	23	-44.24	22	-42.773	29	-41.993	28	-40.627	40	-48.927	47	-42.873	46	-45.9	30	-43.947	28	-44.727
	58	-41.063	58	-45.947	25	-44.333	30	-42.967	39	-41.507	33	-41.013	59	-48.633	109	-43.067	71	-46.093	42	-43.947	42	-44.533
	63	-41.26	63	-45.557	27	-44.433	38	-42.773	49	-41.6	38	-41.407	83	-49.22	219	-42.873	102	-46.093	70	-43.753	67	-44.827
	68	-41.163	68	-45.653	29	-44.627	44	-42.873	73	-41.6	43	-40.92	109	-48.733	433	-42.287	162	-46.68	89	-43.753	98	-44.533
	73	-41.457	73	-45.46	31	-44.14	60	-43.26	103	-41.6	58	-40.82	141	-48.827	532	-43.553	300	-45.993	134	-44.24	143	-45.12
	78	-41.31	78	-45.753	45	-44.333	70	-42.38	123	-41.307	73	-41.7	209	-49.513	592	-43.46	420	-45.507	227	-43.947	251	-44.627
	83	-41.26	83	-45.313	61	-44.727	90	-42.873	143	-40.92	88	-40.233	299	-48.533					400	-43.36	436	-44.533
	88	-40.967	88	-45.8	92	-44.04	120	-42.48	163	-40.82	98	-40.04	452	-48.827					460	-44.14	496	-45.7
	93	-41.407	123	-45.607	102	-44.333	180	-41.8			128	-40.333	532	-48.533
			178	-45.507	122	-44.14	300	-41.7			158	-41.013
					132	-44.14					188	-41.507
					172	-44.333					218	-40.333
					210	-43.947					248	-41.507
					300	-43.947					278	-40.233
					430	-43.847					308	-40.233
											350	-40.72
											362	-40.92
											421	-40.04
											481	-40.333
											541	-39.847
	Scn2aSR/SR KI + GNE-4076 (n=11)
	Cell 1		Cell 2		Cell 3		Cell 4		Cell 5		Cell 6		Cell 7		Cell 8		Cell 9		Cell 10		Cell 11
	Time (sec)	Threshold (mV)	Time (sec)	Threshold (mV)	Time (sec)	Threshold (mV)	Time (sec)	Threshold (mV)	Time (sec)	Threshold (mV)	Time (sec)	Threshold (mV)	Time (sec)	Threshold (mV)	Time (sec)	Threshold (mV)	Time (sec)	Threshold (mV)	Time (sec)	Threshold (mV)	Time (sec)	Threshold (mV)
	4	-27.147	2	-28.613	2	-37.987	2	-34.573	2	-37.45	2	-38.72	2	-42.04	2	-35.253	2	-31.347	2	-26.56	2	-25
	6	-28.807	4	-32.127	4	-38.573	4	-35.74	4	-38.527	4	-38.38	4	-42.627	4	-35.007	4	-32.62	4	-31.347	4	-32.42
	8	-29.3	6	-33.4	6	-39.16	6	-36.427	6	-38.28	6	-38.623	8	-42.87	6	-35.057	6	-34.18	6	-30.86	6	-31.153
	10	-30.86	8	-34.28	8	-39.553	8	-37.013	8	-38.28	10	-40.233	13	-41.993	9	-34.227	8	-34.373	8	-30.76	8	-31.74
	12	-30.76	10	-34.473	10	-39.747	10	-36.813	10	-38.72	13	-40.38	15	-42.627	19	-35.253	10	-34.473	10	-31.54	10	-32.127
	14	-30.567	12	-35.353	13	-40.92	12	-37.6	13	-38.28	21	-39.55	19	-42.92	48	-35.447	12	-34.573	12	-30.567	12	-33.693
	16	-31.447	14	-36.913	17	-39.847	14	-37.793	17	-39.21	39	-41.893	27	-43.017	58	-36.57	14	-35.253	14	-31.54	14	-33.493
	18	-31.347	16	-36.233	23	-40.82	16	-37.207	31	-39.793	48	-42.97	31	-42.43	78	-37.107	16	-35.253	16	-31.253	16	-33.887
	20	-30.373	18	-36.233	30	-40.92	18	-37.6	39	-40.38	68	-43.213	37	-42.43	93	-38.133	18	-35.153	18	-31.253	18	-34.573
	28	-33.2	20	-35.253	36	-41.113	20	-37.6	58	-42.14	138	-43.947	43	-42.723	193	-38.083	20	-35.84	20	-31.74	20	-34.28
	50	-35.353	22	-36.527	65	-42.773	22	-38.28	88	-43.067	198	-43.993	73	-44.727	343	-39.257	30	-37.207	29	-32.813	46	-37.307
	65	-35.447	27	-36.913	95	-43.847	24	-38.967	138	-43.553			138	-44.97			54	-38.573	47	-33.693	109	-40.427
	118	-38.967	35	-38.38	125	-43.753	27	-38.673	258	-45.117			228	-47.12			80	-39.353	72	-35.153	226	-42.873
	178	-38.38	51	-38.573	155	-44.533	28	-38.573	348	-44.923			288	-47.46			104	-39.847	93	-36.72	316	-43.753
	276	-40.627	69	-39.553	185	-43.847	58	-40.14					408	-48.243			155	-40.427	155	-38.187	443	-42.873
	320	-41.113	87	-41.307			88	-42.087									275	-41.407	240	-39.453	607	-43.753
	551	-39.94	89	-40.72			128	-43.067									335	-41.307	342	-39.747
	581	-40.333	94	-40.82			158	-42.873									425	-41.893	462	-39.553
			124	-41.407			188	-43.36									485	-42.287
			154	-42.48			218	-43.753									647	-42.38
			184	-42.38
			214	-42.773
	8a/2aSR/SR KI + GNE-4076 (n=10)
	Cell 1		Cell 2		Cell 3		Cell 4		Cell 5		Cell 6		Cell 7		Cell 8		Cell 9		Cell 10
	Time (sec)	Threshold (mV)	Time (sec)	Threshold (mV)	Time (sec)	Threshold (mV)	Time (sec)	Threshold (mV)	Time (sec)	Threshold (mV)	Time (sec)	Threshold (mV)	Time (sec)	Threshold (mV)	Time (sec)	Threshold (mV)	Time (sec)	Threshold (mV)	Time (sec)	Threshold (mV)
	2	-44.533	2	-48.047	2	-47.947	2	-46.387	2		2	-43.653	4	-49.12	2	-42.967	2	-42.967	2	-43.947
	4	-44.14	6	-47.853	6	-47.947	4	-46.68	4	-41.993	4	-45.313	6	-47.853	4	-44.333	4	-43.847	4	-46.68
	6	-43.847	10	-48.4	10	-47.853	6	-46.973	6	-41.407	6	-45.213	8	-48.533	6	-44.333	6	-43.653	6	-46.387
	8	-43.553	14	-47.853	18	-46.78	8	-46.68	8	-41.213	8	-45.213	10	-48.24	8	-44.333	8	-43.553	8	-46.093
	10	-43.167	18	-48.047	30	-46.937	10	-46.193	10	-42.673	12	-45.02	12	-48.24	10	-43.947	10	-43.753	10	-46.093
	12	-43.653	30	-47.853	42	-46.193	12	-46.387	12	-41.893	14	-46.193	14	-47.753	12	-44.627	12	-43.36	12	-45.313
	16	-43.653	54	-47.653	59	-46.78	14	-46.58	14	-41.507	16	-45.413	16	-48.34	14	-43.653	14	-43.753	14	-45.507
	22	-43.26	70	-46.973	109	-46.78	16	-46.387	16	-42.38	18	-45.12	18	-48.147	16	-44.333	16	-43.847	16	-45.213
	33	-43.167	90	-46.973	149	-46.973	18	-46.193	18	-42.58	20	-45.313	20	-48.047	18	-43.46	18	-43.46	18	-45.993
	53	-43.847	110	-47.46	179	-45.993	20	-46.387	20	-42.287	40	-45.8	40	-47.753	20	-44.04	20	-43.553	20	-45.607
	73	-44.04	172	-47.267	205	-46.387	40	-46.093	35	-42.967	65	-45.7	71	-48.147	27	-43.753	27	-43.553	41	-45.12
	93	-44.24	232	-46.973	235	-46.387	82	-46.68	69	-42.967	119	-45.9	184	-48.34	48	-43.653	41	-43.947	91	-45.413
	153	-43.753			265	-46.287	183	-46.68	143	-42.993	194	-45.7	288	-47.853	91	-43.46	61	-43.553	171	-46.287
	213	-43.26					273	-46.193	243	-42.48	318	-44.92	408	-46.68	154	-43.847	136	-43.067	343	-45.607
	273	-44.04					398	-46.287	332	-43.167	552	-44.827	528	-47.46	274	-44.14	255	-43.26	523	-46.287
	333	-43.36							464	-42.38					475	-44.04	345	-42.873	643	-46.58
	363	-43.46															408	-42.673
	393	-43.847															588	-43.46

## Sheet: Figure 3-S2B
	Wildtype no drug (n=12 cells)	Wildtype + GNE-4076 (n=11 cells)	Scn8aSR/SR KI + GNE-4076 (n=11 cells)	Scn2aSR/SR KI + GNE-4076 (n=11 cells)	8a/2aSR/SR KI + GNE-4076 (n=11 cells)
	-40.0067	-29.5508	-42.2135	-35.997	-43.653
	-44.09	-28.173	-46.1685	-40.3835	-45.1665
	-44.8828	-30.3067	-44.6535	-37.56	-48.1
	-47.2418	-37.2668	-43.0464	-38.745	-47.3165
	-45	-29.0826	-41.5767	-40.0543	-45.4118
	-43.4815	-26.992	-41.7968	-42.5133	-48.1054
	-44.12	-28.4386	-47.9892	-34.74	-44.0226
	-42.6374	-32.9508	-42.8118	-35.2144	-43.5946
	-38.984	-33.0282	-45.2146	-30.8988	-45.5266
	-40.2548	-25.5266	-43.6334	-31.2706	-46.3868
	-42.4986	-28.0854	-44.1586	-33.9852	-42.1294
	-41.388

## Sheet: Figure 3-S2C
	Wildtype, no drug control (n=12)
	Cell 1		Cell 2		Cell 3		Cell 4		Cell 5		Cell 6		Cell 7		Cell 8		Cell 9		Cell 10		Cell 11		Cell 12
	Time (sec)	dV/dt (V/s)	Time (sec)	dV/dt (V/s)	Time (sec)	dV/dt (V/s)	Time (sec)	dV/dt (V/s)	Time (sec)	dV/dt (V/s)	Time (sec)	dV/dt (V/s)	Time (sec)	dV/dt (V/s)	Time (sec)	dV/dt (V/s)	Time (sec)	dV/dt (V/s)	Time (sec)	dV/dt (V/s)	Time (sec)	dV/dt (V/s)	Time (sec)	dV/dt (V/s)
	4	442	2	256.33	2	393	2	244.17	2	417.5	4	390.67	3	398	2	234.33	2	229.5	2	422.33	2	315	2	244.17
	6	461.33	4	395.5	4	412.67	4	346.67	4	556.5	6	415	5	417.5	4	354	4	371.17	4	480.83	4	429.67	4	356.33
	8	480.83	6	434.5	6	454.17	6	383.33	6	588.5	8	422.33	7	427.33	6	388.17	6	412.67	6	512.67	6	481	6	373.5
	10	476.17	8	454.17	8	468.83	8	405.17	8	610.5	10	420	9	437	8	405.17	8	439.5	8	510.33	8	488.17	8	395.5
	12	488.33	10	456.5	10	476	10	417.5	10	630	12	439.5	11	439.5	10	407.67	10	451.67	10	517.67	10	500.5	10	405.33
	14	493.17	12	478.5	12	500.5	12	407.67	18	644.55	14	439.5	13	441.83	12	415.17	12	461.5	12	539.67	12	510.17	12	405.33
	16	500.5	14	481	16	512.67	14	419.83	24	629.83	16	437	15	437	14	427.17	14	478.5	14	534.67	14	510.33	14	419.83
	18	495.67	16	483.33	20	503	16	437	32	642.17	18	444.33	17	441.83	16	429.67	16	485.83	16	534.67	16	520	16	410.17
	20	510.33	18	495.67	26	515.17	18	446.83	58	656.67	20	461.5	19	441.83	18	429.83	18	488.33	18	534.67	18	524.83	18	415
	39	520	20	483.5	30	527.33	20	442	78	669	30	459	21	444.33	20	427.17	29	520	20	544.33	20	537	20	424.83
	63	522.5	34	498	37	522.5	41	473.67			50	478.5	23	441.83	25	444.33	54	537.17	34	549.33	44	568.83	35	429.67
	95	546.83	49	525	57	524.83	73	478.5			76	478.67	25	444.33	49	471.17	94	559	58	556.67	65	566.33	54	441.83
	172	534.67	69	512.67	77	539.5	130	488.17			122	490.83	27	439.5	113	488.33	169	554.17	86	564	91	581.17	84	434.5
	292	539.5	167	517.67	78	554.17	271	488.33			214	495.67	29	444.33	196	493.17	302	549.33	164	564	151	578.5	139	449.17
	413	544.33	262	520			457	478.5			334	493.17	31	444.33	397	498	569	556.67	371	566.5	234	581	184	434.67
			587	524.83							424	498	43	444.33	561	500.5			578	564	448	581
													73	456.5							560	586
													93	454
													113	454.17
													133	461.33
	Wildtype + GNE-4076 (n=11)
	Cell 1		Cell 2		Cell 3		Cell 4		Cell 5		Cell 6		Cell 7		Cell 8		Cell 9		Cell 10		Cell 11
	Time (sec)	dV/dt (V/s)	Time (sec)	dV/dt (V/s)	Time (sec)	dV/dt (V/s)	Time (sec)	dV/dt (V/s)	Time (sec)	dV/dt (V/s)	Time (sec)	dV/dt (V/s)	Time (sec)	dV/dt (V/s)	Time (sec)	dV/dt (V/s)	Time (sec)	dV/dt (V/s)	Time (sec)	dV/dt (V/s)	Time (sec)	dV/dt (V/s)
	2	48.833	2	34.167	2	244.17	2	56.167	4	97.667	2	44	2	61	2	109.83	2	92.833	4	100	2	63.5
	4	102.5	4	78.167	4	273.33	4	190.33	6	129.5	4	110	4	122	4	146.5	4	215	6	131.83	4	136.67
	6	127	6	109.83	6	285.67	6	222.17	8	156.33	6	136.67	6	158.67	6	163.5	6	227.17	8	153.83	6	173.33
	8	139.17	8	122.17	8	315	8	251.5	10	161.17	8	158.67	8	175.67	8	178.17	8	232	10	173.33	8	190.33
	10	136.67	10	134.33	10	327	10	261.17	12	185.5	10	183	10	195.17	10	195.33	10	246.67	12	175.67	10	205.17
	12	156.17	14	151.33	12	349.17	12	278.33	14	190.5	12	192.83	12	202.67	12	200.17	12	266	14	190.33	12	219.83
	14	171	18	156.33	14	361.33	14	283.17	16	200.33	14	200.17	14	212.33	14	217.17	14	266	16	192.83	14	236.83
	16	175.67	22	158.67	18	373.67	16	293	18	205	16	210	16	224.5	16	227	16	271	18	200.17	16	251.5
	18	168.33	26	171	22	402.83	18	310.17	20	200.17	18	214.83	18	236.67	18	244.17	18	290.5	20	207.5	18	266.17
	20	175.83	30	180.67	28	424.83	20	312.5	34	253.83	20	227.17	20	249	20	236.83	20	295.33	52	305.17	20	261.33
	22	188	34	188	38	449.17	30	376	65	310	40	334.5	32	290.5	40	307.67	43	349.17	134	422.5	44	373.5
	26	207.5	38	195.33	48	525	50	437	129	395.5	62	378.5	57	368.67	64	356.33	68	393	305	476.17	95	468.67
	30	205	42	195.33	58	554.17	67	463.83	219	434.5	106	476	98	427.33	96	400.5	94	444.33	425	473.67	198	532.17
	34	207.67	53	217.33	88	593.17	97	524.83	373	456.5	166	505.33	143	466.33	171	437	118	454			379	559.17
	38	217.33	63	258.83	108	610.5	142	549.33	493	454.17	290	537	208	500.5	269	478.5	181	483.5			594	547
	42	227	83	312.5	138	632.33	199	576.17			414	564	323	529.83	369	478.5	307	522.5
	56	258.67	93	329.67	198	637.17	319	561.67			534	566.33	443	554.17	489	483.33	458	522.5
	76	305.17	113	354	228	651.83	387	556.67			615	568.83			549	476
	96	334.5	152	390.67			507	554.33
	116	358.83	182	405.17
	136	388.33	212	422.33
	176	422.33	242	424.83
	236	451.67	302	442
	296	466.33	362	446.83
	356	473.67	422	459
	446	478.5	482	468.67
	596	478.5
	Scn8aSR/SR KI + GNE-4076 (n=11)
	Cell 1		Cell 2		Cell 3		Cell 4		Cell 5		Cell 6		Cell 7		Cell 8		Cell 9		Cell 10		Cell 11
	Time (sec)	dV/dt (V/s)	Time (sec)	dV/dt (V/s)	Time (sec)	dV/dt (V/s)	Time (sec)	dV/dt (V/s)	Time (sec)	dV/dt (V/s)	Time (sec)	dV/dt (V/s)	Time (sec)	dV/dt (V/s)	Time (sec)	dV/dt (V/s)	Time (sec)	dV/dt (V/s)	Time (sec)	dV/dt (V/s)	Time (sec)	dV/dt (V/s)
	3	180.67	3	186.75	3	244.17	2	205	3	315	2	202.67	4	210	2	73.333	4	178.17	2	134.33	2	146.5
	8	253.92	8	261.25	5	254	4	312.5	5	361	4	224.5	6	234.5	4	178.33	6	210	4	214.83	4	236.67
	13	275.92	13	283.25	7	271	6	346.67	7	393	6	244.17	8	263.67	6	207.5	8	231.83	6	239.33	6	263.67
	18	293	18	302.75	9	280.67	8	358.83	9	415	8	256.5	10	278.33	8	229.5	10	236.83	8	249	8	273.33
	23	302.75	23	308.83	11	285.67	10	376	11	434.5	10	268.5	12	285.67	10	246.5	12	258.67	10	268.5	10	297.83
	28	311.25	28	317.33	13	282.83	12	380.83	13	449.17	12	268.67	14	305.17	12	256.33	14	258.67	12	273.5	12	295.5
	33	317.33	33	322.25	15	300.33	14	393	15	454.17	14	283.17	16	307.5	14	256.33	16	271	14	285.67	14	310.17
	38	323.5	38	327.17	17	302.67	16	400.5	17	461.33	16	285.67	18	317.33	16	276	18	278.17	16	290.5	16	324.83
	43	324.75	43	330.83	19	307.67	18	410.17	21	483.33	18	295.5	20	327.17	18	275.83	20	283.17	18	305.17	18	327.17
	48	332	48	327.17	21	307.67	20	417.33	25	485.83	24	312.5	29	344.17	20	295.5	30	305.17	20	310	20	334.5
	53	334.5	53	328.33	23	312.5	22	415.17	29	510.17	28	324.67	40	363.83	47	337	46	332	30	332.17	28	356.5
	58	336.92	58	333.25	25	317.33	30	432.17	39	515.17	33	339.33	59	383.33	109	385.83	71	363.83	42	356.33	42	376
	63	345.5	63	338.17	27	312.5	38	437	49	517.67	38	354	83	412.5	219	422.33	102	380.83	70	376	67	397.83
	68	349.08	68	338.17	29	317.33	44	446.83	73	515	43	368.67	109	427.17	433	422.33	162	419.83	89	397.83	98	434.67
	73	350.33	73	338.17	31	319.83	60	473.67	103	559	58	395.5	141	451.67	532	459	300	429.67	134	415	143	466.33
	78	352.83	78	339.33	45	329.67	70	490.67	123	578.67	73	420	209	454.17	592	449.17	420	444.33	227	451.67	251	481
	83	354	83	343.08	61	336.83	90	510.33	143	600.67	88	429.67	299	473.67					400	476	436	512.83
	88	350.33	88	343	92	363.67	120	527.33	163	590.83	98	437	452	481					460	473.67	496	505.33
	93	358.92	123	350.33	102	380.83	180	529.83			128	446.83	532	466.33
			178	362.58	122	395.5	300	537.17			158	461.33
					132	398					188	476
					172	405.17					218	473.67
					210	422.33					248	481
					300	432					278	471.17
					430	429.67					308	478.5
											350	473.67
											362	468.67
											421	481
											481	481
											541	476.17
	Scn2aSR/SR KI + GNE-4076 (n=11)
	Cell 1		Cell 2		Cell 3		Cell 4		Cell 5		Cell 6		Cell 7		Cell 8		Cell 9		Cell 10		Cell 11
	Time (sec)	dV/dt (V/s)	Time (sec)	dV/dt (V/s)	Time (sec)	dV/dt (V/s)	Time (sec)	dV/dt (V/s)	Time (sec)	dV/dt (V/s)	Time (sec)	dV/dt (V/s)	Time (sec)	dV/dt (V/s)	Time (sec)	dV/dt (V/s)	Time (sec)	dV/dt (V/s)	Time (sec)	dV/dt (V/s)	Time (sec)	dV/dt (V/s)
	4	254	2	134.17	2	224.67	2	168.33	2	253.92	2	289.33	2	396.67	2	344.17	2	195.33	2	156.17	2	90.333
	6	273.33	4	243.33	4	334.5	4	219.67	4	308.83	4	334.42	4	465.08	4	405.25	4	293	4	293	4	227
	8	312.5	6	290.5	6	381	6	246.5	6	324.75	6	374.83	8	498	6	422.33	6	339.33	6	315	6	249
	10	322.17	8	307.5	8	395	8	266.17	8	336.92	10	380.83	13	504.17	9	430.92	8	349	8	344.33	8	278.33
	12	324.67	10	327.17	10	405.33	10	280.67	10	341.83	13	396.75	15	510.25	19	438.25	10	371	10	344.33	10	302.67
	14	344.33	12	334.5	13	417.5	12	300.33	13	351.58	21	395.5	19	511.5	48	460.17	12	366.17	12	361.33	12	307.67
	16	341.83	14	341.83	17	420	14	302.67	17	352.75	39	437	27	527.33	58	468.75	14	383.33	14	366.17	14	332
	18	349.17	16	346.67	23	417.33	16	315	31	363.75	48	441.83	31	540.75	78	488.25	16	393	16	371	16	324.83
	20	349.17	18	354	30	420	18	334.5	39	384.5	68	450.42	37	534.67	93	489.5	18	393.17	18	359	18	339.33
	28	388.33	20	354	36	444.33	20	332	58	427.25	138	463.83	43	545.58	193	512.67	20	390.67	20	373.5	20	337
	50	417.5	22	361.33	65	468.67	22	339.33	88	428.5	198	465.08	73	576.25	343	492	30	412.67	29	373.5	46	400.33
	65	427.17	27	371.17	95	468.83	24	346.67	138	432.08			138	581.08			54	441.83	47	402.83	109	471.17
	118	473.67	35	378.33	125	490.67	27	349	258	451.67			228	604.25			80	459	72	410.17	226	490.67
	178	493.17	51	383.33	155	493.17	28	351.5	348	457.75			288	605.42			104	478.5	93	427.33	316	510.33
	276	510.33	69	385.83	185	503	58	419.83					408	622.5			155	485.83	155	466.33	443	515.17
	320	510.17	87	398			88	427.33									275	503	240	485.83	607	512.67
	551	517.5	89	385.67			128	434.5									335	507.67	342	481
	581	507.83	94	395.5			158	437									425	498	462	495.5
			124	422.33			188	439.33									485	495.67
			154	429.67			218	446.67									647	490.67
			184	434.67
			214	446.83
	8a/2aSR/SR KI + GNE-4076 (n=10)
	Cell 1		Cell 2		Cell 3		Cell 4		Cell 5		Cell 6		Cell 7		Cell 8		Cell 9		Cell 10
	Time (sec)	dV/dt (V/s)	Time (sec)	dV/dt (V/s)	Time (sec)	dV/dt (V/s)	Time (sec)	dV/dt (V/s)	Time (sec)	dV/dt (V/s)	Time (sec)	dV/dt (V/s)	Time (sec)	dV/dt (V/s)	Time (sec)	dV/dt (V/s)	Time (sec)	dV/dt (V/s)	Time (sec)	dV/dt (V/s)
	2	446.83	2	459	2	390.5	2	285.67	2		2	278.33	4	351.67	2	229.5	2	310	2	246.5
	4	478.67	6	500.5	6	456.5	4	422.33	4	429.67	4	393	6	373.5	4	359	4	415	4	371.17
	6	495.5	10	522.5	10	471.17	6	439.5	6	459	6	437	8	393	6	385.83	6	444.33	6	405.33
	8	515.17	14	532.17	18	488.33	8	454.17	8	476.17	8	456.5	10	400.33	8	405.33	8	454.17	8	412.5
	10	515.17	18	542	30	495.67	10	459	10	488.33	12	483.33	12	412.67	10	412.67	10	473.67	10	412.5
	12	522.5	30	544.5	42	488.17	12	473.5	12	485.83	14	485.83	14	422.33	12	432	12	476.17	12	419.83
	16	532.17	54	542	59	495.67	14	473.67	14	490.67	16	488.17	16	417.5	14	429.67	14	485.83	14	422.33
	22	539.67	70	539.5	109	510.33	16	471.17	16	500.5	18	495.67	18	424.83	16	432.17	16	476	16	422.33
	33	561.5	90	539.67	149	512.67	18	481	18	500.5	20	495.67	20	417.5	18	432	18	490.67	18	422.33
	53	564	110	551.83	179	512.678	20	483.5	20	500.5	40	520	40	444.33	20	444.33	20	493.17	20	415
	73	564	172	554.17	205	502.83	40	502.83	35	534.67	65	525	71	456.5	27	451.67	27	493.17	41	432.17
	93	576.17	232	564	235	517.67	82	515.17	69	529.83	119	554.33	184	451.67	48	454.17	41	495.67	91	441.83
	153	583.5			265	507.83	183	512.67	143	537.17	194	564	288	451.67	91	466.17	61	515.17	171	495.67
	213	581					273	527.33	243	554.17	318	566.33	408	437	154	466.17	136	510.33	343	495.67
	273	581					398	546.83	332	568.83	552	549.33	528	451.67	274	466.33	255	527.33	523	503
	333	588.33							464	559					475	463.83	345	524.83	643	495.67
	363	595.67															408	534.67
	393	595.67															588	544.5

## Sheet: Figure 3-S2D
	Wildtype no drug (n=12 cells)	Wildtype + GNE-4076 (n=11 cells)	Scn8aSR/SR KI + GNE-4076 (n=11 cells)	Scn2aSR/SR KI + GNE-4076 (n=11 cells)	8a/2aSR/SR KI + GNE-4076 (n=11 cells)
	505.39	169.4	284.46	346.2	527.335
	637.275	153.83	293	418.75	511.5
	444.366	361.39	298.375	316.9	532.223
	440.623	295.434	400.366	352.165	479.75
	425.802	196.3	462	391.027	489.734
	478.54	209	283.252	508.64	418.966
	520.466	225.034	308.568	434.585	434.034
	415.032	225.068	271.998	385.268	484.368
	430.666	277.766	269.936	341.834	420.364
	497.6	193.3	292.968	366.2	476.568
	537.602	247.132	318.434	328.166	495.6
	484.4

## Sheet: Figure 3-S2E
	Wildtype, no drug control (n=12)
	Cell 1		Cell 2		Cell 3		Cell 4		Cell 5		Cell 6		Cell 7		Cell 8		Cell 9		Cell 10		Cell 11		Cell 12
	Time (sec)	dV/dt (V/s)	Time (sec)	dV/dt (V/s)	Time (sec)	dV/dt (V/s)	Time (sec)	dV/dt (V/s)	Time (sec)	dV/dt (V/s)	Time (sec)	dV/dt (V/s)	Time (sec)	dV/dt (V/s)	Time (sec)	dV/dt (V/s)	Time (sec)	dV/dt (V/s)	Time (sec)	dV/dt (V/s)	Time (sec)	dV/dt (V/s)	Time (sec)	dV/dt (V/s)
	4	109.83	2	129.33	2	185.5	2	131.83	2	251.5	4	180.67	3	158.83	2	131.83	2	124.5	2	134.33	2	178.17	2	156.17
	6	175.83	4	171	4	205	4	180.67	4	305.17	6	192.83	5	158.67	4	158.83	4	178.17	4	131.83	4	232	4	195.33
	8	173.33	6	217.33	6	217.33	6	195.33	6	322	8	214.83	7	171	6	185.67	6	192.83	6	166	6	246.67	6	205
	10	180.67	8	231.83	8	227	8	207.5	8	341.33	10	219.83	9	180.67	8	197.83	8	202.5	8	219.83	8	263.67	8	219.67
	12	192.83	10	231.83	10	229.5	10	205	10	324.67	12	207.5	11	178.17	10	178.33	10	193	10	227.17	10	263.67	10	224.67
	14	192.83	12	231.67	12	241.67	12	205.17	12	344.33	14	214.83	13	175.83	12	195.33	12	231.83	12	243.83	12	275.83	12	227.5
	16	183.17	14	241.67	14	229.5	14	214.83	14	356.17	16	209.83	15	166	14	193	14	229.5	14	239.17	14	275.83	14	231.83
	18	209.83	16	249	16	239.33	16	212.33	16	351.5	18	224.17	17	181	16	200.17	16	239.33	16	254	16	268.5	16	222.17
	20	183.17	18	246.67	18	241.83	18	217.33	18	373.67	20	219.83	19	175.67	18	207.17	18	253.83	18	236.83	18	288	18	239.33
	39	209.83	20	246.33	20	246.5	20	222.17	20	351.5	30	229.5	21	200.17	20	201.5	29	246.67	20	249	20	292.17	20	234.33
	63	210	34	258.83	26	256.33	41	246.5	24	383.33	50	249.17	23	192.83	25	205.17	54	312.5	34	258.83	44	324.67	35	236.67
	95	219.67	49	275.83	30	270.83	73	241.67	32	388.17	76	258.83	25	200.17	49	251.5	94	317.33	58	258.83	65	312.5	54	261.17
	172	207.5	69	285.67	37	273.5	130	251.5	58	383.33	122	261.17	27	210	113	258.67	169	285.67	86	263.67	91	339.5	84	256.33
	292	185.5	167	278.33	57	276	271	254	78	383.17	214	258.83	29	197.67	196	236.83	302	283.17	164	273.33	151	329.67	139	251.5
	413	222.17	262	283.33	77	268.5	457	246.5			334	234.33	31	200.17	397	258.83	569	276	371	249	234	314.83	184	258.83
			587	271	78	295.33					424	239.33	43	205.17	561	258.83			578	261.17	448	351.5
													73	192.83							560	302.83
													93	202.67
													113	205
													133	192.83
	Wildtype + GNE-4076 (n=11)
	Cell 1		Cell 2		Cell 3		Cell 4		Cell 5		Cell 6		Cell 7		Cell 8		Cell 9		Cell 10		Cell 11
	Time (sec)	dV/dt (V/s)	Time (sec)	dV/dt (V/s)	Time (sec)	dV/dt (V/s)	Time (sec)	dV/dt (V/s)	Time (sec)	dV/dt (V/s)	Time (sec)	dV/dt (V/s)	Time (sec)	dV/dt (V/s)	Time (sec)	dV/dt (V/s)	Time (sec)	dV/dt (V/s)	Time (sec)	dV/dt (V/s)	Time (sec)	dV/dt (V/s)
	2	0	2	0	2	122	2	26.833	4	41.5	2	26.833	2	21.833	2	61.167	2	44	4	29.333	2	31.667
	4	0	4	0	3	144.17	4	83	6	51.333	4	39	4	41	4	78.167	4	102.5	6	36.667	4	34.167
	6	0	6	0	4	153.83	6	95.167	8	58.667	6	53.667	6	41.5	6	102.5	6	104.83	8	58.5	6	53.667
	8	0	8	29.333	5	173.33	8	102.67	10	80.5	8	58.667	8	58.667	8	114.83	8	112.33	10	58.667	8	80.667
	10	0	10	31.833	6	153.83	10	124.67	12	78.167	10	51.333	10	63.5	10	117.17	10	122	12	85.333	10	83
	12	53.667	12	46.333	7	180.67	12	122	14	90.333	12	90.333	12	70.833	12	124.33	12	129.5	14	66	12	102.67
	14	85.333	14	51.333	8	178.17	14	139.17	16	80.667	14	92.667	14	73.333	14	122	14	119.67	16	107.5	14	102.67
	16	85.5	16	48.833	9	188	16	148.83	18	92.667	16	92.833	16	95.333	16	139.17	16	127	18	109.83	16	108.67
	18	85.5	18	58.5	10	188	18	146.5	20	107.5	18	109.83	18	95.333	18	141.67	18	134.17	20	107.33	18	131.83
	20	95.167	20	46.333	11	183.17	20	163.67	34	149	20	109.83	20	109.83	20	144	20	141.67	52	168.5	20	127
	22	107.33	22	56.167	12	207.5	30	185.67	65	175.83	40	185.5	32	117.17	40	193	43	166	134	246.5	44	195.33
	26	117.17	26	83	15	227.17	50	202.67	129	202.67	62	227	57	188	64	219.67	68	197.67	305	253.83	95	236.83
	30	114.83	30	95.167	20	239.33	67	210	219	234.33	106	261.17	98	217.33	96	273.5	94	224.67	425	261.17	198	261.17
	34	114.83	34	90.333	21	271	97	256.33	373	246.67	166	273.5	143	214.83	171	283.17	118	224.67			379	268.67
	38	114.83	38	92.667	22	288	142	278.33	493	256.33	290	288	208	219.83	269	280.83	181	224.67			594	266.17
	42	124.5	42	102.5	25	297.83	199	307.67			414	302.67	323	239.33	369	290.5	307	246.67
	56	129.33	53	114.67	27	310	319	307.67			534	312.5	443	249	489	283.33	458	246.5
	76	151.33	63	155.67	28	346.67	387	268.5			615	295.5			549	280.83
	96	178.33	83	173.33	30	319.83	507	266.17
	116	195.33	93	195.33	31	332.17
	136	205	113	205
	176	219.83	152	229.5
	236	234.33	182	241.67
	296	244.17	212	256.33
	356	258.67	242	258.83
	446	251.5	302	268.5
	596	266	362	268.67
			422	266
			482	261.17
	Scn8aSR/SR KI + GNE-4076 (n=11)
	Cell 1		Cell 2		Cell 3		Cell 4		Cell 5		Cell 6		Cell 7		Cell 8		Cell 9		Cell 10		Cell 11
	Time (sec)	dV/dt (V/s)	Time (sec)	dV/dt (V/s)	Time (sec)	dV/dt (V/s)	Time (sec)	dV/dt (V/s)	Time (sec)	dV/dt (V/s)	Time (sec)	dV/dt (V/s)	Time (sec)	dV/dt (V/s)	Time (sec)	dV/dt (V/s)	Time (sec)	dV/dt (V/s)	Time (sec)	dV/dt (V/s)	Time (sec)	dV/dt (V/s)
	3	147.75	3	155	3	156.17	2	136.67	3	151.33	2	153.83	4	163.5	2	48.833	4	158.67	2	105	2	134.33
	8	164.83	8	179.42	5	156.33	4	183.17	5	163.67	4	161	6	185.67	4	126.83	6	170.83	4	141.5	4	180.67
	13	178.25	13	192.83	7	158.67	6	192.83	7	188	6	174.5	8	192.83	6	134.33	8	175.67	6	153.67	6	197.67
	18	194.08	18	200.17	9	158.67	8	202.67	9	187.83	8	175.83	10	205.17	8	139.17	10	183.17	8	151.33	8	200.17
	23	202.58	23	201.42	11	171	10	197.67	11	192.83	10	180.67	12	210	10	144	12	185.67	10	161.17	10	197.83
	28	206.33	28	208.75	13	170.83	12	210	13	195.33	12	180.67	14	217.33	12	163.67	14	195.33	12	163.5	12	212.5
	33	208.75	33	211.17	15	170.83	14	217.17	15	207.5	14	185.5	16	214.83	14	158.83	16	195.33	14	163.67	14	219.83
	38	212.42	38	213.67	17	173.33	16	212.33	17	212.33	16	188	18	227	16	166	18	205.17	16	166.17	16	217.33
	43	203.92	43	217.25	19	180.67	18	215	19	207.83	18	185.5	20	234.33	18	166	20	205.17	18	168.5	18	214.83
	48	212.42	48	217.25	21	173.33	20	224.5	21	222.33	24	207.5	29	241.83	20	166	30	209.83	20	168.33	20	214.83
	53	216.08	53	219.67	23	185.67	22	227	25	227	28	210	40	254	47	205	46	224.67	30	183.17	28	249.17
	58	207.5	58	213.67	25	195.33	30	224.5	29	246.5	33	219.83	59	261.17	109	236.83	71	249	42	192.83	42	244
	63	219.75	63	211.17	27	190.33	38	232	39	229.33	38	229.5	83	283.17	219	232	102	249	70	202.5	67	258.67
	68	219.75	68	209.92	29	190.5	44	231.83	49	236.83	43	224.67	109	280.83	433	236.83	162	266	89	197.83	98	273.5
	73	207.58	73	221	31	195.33	60	256.33	73	224.67	58	241.67	141	283.17	532	251.33	300	266.17	134	210	143	268.5
	78	216.08	78	212.42	45	192.83	70	251.33	103	241.67	73	249.17	209	280.83	592	236.83	420	271	227	224.5	251	302.83
	83	221	83	210	61	197.83	90	268.67	123	246.5	88	263.67	299	292.83					400	224.5	436	288
	88	201.42	88	213.67	92	202.67	120	256.33	143	244.17	98	261.33	452	285.67					460	222.17	496	290.5
	93	209.92	123	218.5	102	193	180	271	163	263.67	128	263.67	532	302.83
			178	223.42	122	200.33	300	278.33			158	273.5
					132	200.17					188	285.67
					172	200.17					218	263.67
					210	200.17					248	288
					300	207.67					278	275.83
					430	202.67					308	258.83
											350	271
											362	266.17
											421	273.5
											481	288
											541	266.17
	Scn2aSR/SR KI + GNE-4076 (n=11)
	Cell 1		Cell 2		Cell 3		Cell 4		Cell 5		Cell 6		Cell 7		Cell 8		Cell 9		Cell 10		Cell 11
	Time (sec)	dV/dt (V/s)	Time (sec)	dV/dt (V/s)	Time (sec)	dV/dt (V/s)	Time (sec)	dV/dt (V/s)	Time (sec)	dV/dt (V/s)	Time (sec)	dV/dt (V/s)	Time (sec)	dV/dt (V/s)	Time (sec)	dV/dt (V/s)	Time (sec)	dV/dt (V/s)	Time (sec)	dV/dt (V/s)	Time (sec)	dV/dt (V/s)
	4	56	4	68.333	4	127	2	90.333	2	136.75	2	136.67	2	178.25	2	196.5	2	109.83	2	56.167	2	34.167
	6	88	6	114.83	6	129.5	4	114.67	4	137.92	4	163.58	4	201.42	4	227.08	4	139.17	4	122.17	4	90.333
	8	102.67	8	141.5	8	156.33	6	134.33	6	159.83	6	168.42	8	212.33	6	247.75	6	148.83	6	151.33	6	105
	10	92.833	10	129.33	10	166	8	139.17	8	151.42	10	183.08	13	224.58	9	256.42	8	158.67	8	131.83	8	117.17
	12	122.17	12	141.5	13	166.17	10	141.5	10	166	12	200.17	15	225.83	13	246.58	10	183.17	10	136.67	10	119.67
	14	119.67	14	151.33	15	163.5	12	144	12	157.5	15	179.42	17	222.17	15	252.67	12	178.33	12	175.83	12	122.17
	16	131.83	16	163.5	17	175.83	14	148.83	14	181.92	17	202.67	19	229.5	17	256.33	14	187.83	14	149	14	114.83
	18	136.67	18	156.17	19	170.83	16	158.67	16	168.42	19	208.75	27	245.33	19	269.75	16	185.5	16	170.83	16	100.17
	20	139.17	20	151.33	23	180.67	18	168.5	18	173.42	23	216.08	31	246.58	48	280.83	18	178.17	18	168.5	18	139.17
	28	146.5	22	146.5	30	190.5	20	171	20	186.75	39	249	37	235.58	58	268.58	20	192.83	20	173.33	20	158.67
	50	195.33	27	163.5	36	175.83	22	175.83	31	184.33	48	233.08	43	264.83	78	278.33	30	210	29	195.33	46	195.33
	65	188	35	185.5	65	207.5	24	173.33	39	188	68	247.83	73	271	93	300.25	54	227.17	47	217.33	109	251.5
	118	217.33	51	183.17	95	202.67	27	151.33	58	192.92	138	267.33	138	289.25	193	283.25	80	244.17	72	212.5	226	278.33
	178	209.83	69	192.83	125	197.67	28	185.67	88	227.08	198	250.25	228	306.42	343	291.75	104	266.17	93	244.17	316	263.67
	276	222.17	87	185.5	155	217.17	58	212.5	138	222.25			288	296.67			155	263.67	155	261.33	443	276
	320	241.67	89	178.33	185	222.17	88	205	258	236.83			408	310.08			275	251.5	240	263.67	607	276
	551	214.83	94	192.83			128	217.33	348	232							335	258.67	342	268.5
	581	229.5	124	205.17			158	239.17									425	251.5	462	275.83
			154	195.17			188	239.17									485	258.67
			184	217.33			218	231.83									647	251.33
			214	234.33
	8a/2aSR/SR KI + GNE-4076 (n=10)
	Cell 1		Cell 2		Cell 3		Cell 4		Cell 5		Cell 6		Cell 7		Cell 8		Cell 9		Cell 10
	Time (sec)	dV/dt (V/s)	Time (sec)	dV/dt (V/s)	Time (sec)	dV/dt (V/s)	Time (sec)	dV/dt (V/s)	Time (sec)	dV/dt (V/s)	Time (sec)	dV/dt (V/s)	Time (sec)	dV/dt (V/s)	Time (sec)	dV/dt (V/s)	Time (sec)	dV/dt (V/s)	Time (sec)	dV/dt (V/s)
	2	200.17	2	227	2	173.33	2	188	2		2	151.33	4	178.17	2	146.5	2	180.67	2	131.83
	4	200.17	6	229.5	6	202.67	4	244.17	4	212.5	4	173.33	6	180.67	4	185.5	4	222.17	4	188
	6	222.17	10	261.33	10	197.67	6	258.83	6	224.5	6	205.17	8	185.5	6	190.5	6	251.5	6	210
	8	224.67	14	258.67	14	212.33	8	256.33	8	224.67	8	210	10	202.5	8	205	8	246.67	8	217.33
	10	234.33	18	251.5	18	229.5	10	256.33	10	256.5	12	222.17	12	200.17	10	197.67	10	251.5	10	210
	12	236.83	30	263.67	30	222.17	12	277.33	12	249	14	236.67	14	212.33	12	227.17	12	256.33	12	229.5
	14	234.33	54	258.83	42	234.33	14	275.83	14	249	16	229.5	16	217.33	14	214.83	14	266	14	231.83
	16	234.17	70	273.5	59	219.67	16	285.67	16	263.67	18	229.5	18	212.5	16	234.33	16	266.17	16	234.33
	18	234.5	90	273.5	109	239.33	18	273.5	18	273.5	20	232	20	205.17	18	219.67	18	263.67	18	236.83
	20	234.33	110	256.33	149	227	20	278.33	20	273.33	40	246.67	40	224.67	20	229.5	20	273.5	20	224.67
	22	214.83	172	266	179	232	40	298	35	314.83	65	249.17	71	234.33	27	246.5	27	266.17	41	222.17
	33	249.17	232	256.33	205	231.83	82	293	69	307.5	119	266.17	184	219.83	48	275.83	41	253.83	91	200.17
	53	254			235	234.5	183	312.5	143	285.67	194	271	288	222.17	91	239.17	61	273.33	171	256.33
	73	249			265	244.17	273	305.17	243	278.33	318	254	408	212.5	154	239.33	136	273.33	343	271
	93	263.67					398	307.5	332	273.5	552	305.17	528	212.33	274	231.83	255	288	523	266
	153	258.67							464	273.5					475	234.33	345	278.33	643	285.67
	213	244.17															408	278.33
	273	239.17															588	288.17
	333	236.83
	363	244.17
	393	256.33

## Sheet: Figure 3-S2F
	Wildtype no drug (n=12 cells)	Wildtype + GNE-4076 (n=11 cells)	Scn8aSR/SR KI + GNE-4076 (n=11 cells)	Scn2aSR/SR KI + GNE-4076 (n=11 cells)	8a/2aSR/SR KI + GNE-4076 (n=11 cells)
	239.766	81.0334	186.165	152.766	234.832
	355.434	50.2664	196.5	169.083	206.25
	215.232	183.602	173.798	165.1	257.167
	174.625	144.034	215.8	173.602	213.167
	199.434	89.8668	205.748	197.752	229.968
	238.623	99.0986	184.917	225.52	209.5
	280.066	88.9324	220.698	256.332	225.1
	231.032	134.234	164.1	184.532	265.134
	214.366	130.402	197.334	129.902	231.432
	192.366	95.1986	166.034	167.498	278.132
	244.566	114.568	215.864	127.002	261.7
	243.068
