# Supplementary material for: Differential roles of NaV1.2 and NaV1.6 in neocortical pyramidal cell excitability
Source: eLife. 2025 Jul 15;14:RP105696. doi: 10.7554/eLife.105696 (PMC12263156; doi:10.7554/eLife.105696)
Supplement: Figure 3—source data 1. [file elife-105696-fig3-data1.xlsx]

## Sheet: Figure 3D
	Wildtype, no drug control (n=12)
	Cell 1		Cell 2		Cell 3		Cell 4		Cell 5		Cell 6		Cell 7		Cell 8		Cell 9		Cell 10		Cell 11		Cell 12
	Time (sec)	D Threshold (mV)	Time (sec)	D Threshold (mV)	Time (sec)	D Threshold (mV)	Time (sec)	D Threshold (mV)	Time (sec)	D Threshold (mV)	Time (sec)	D Threshold (mV)	Time (sec)	D Threshold (mV)	Time (sec)	D Threshold (mV)	Time (sec)	D Threshold (mV)	Time (sec)	D Threshold (mV)	Time (sec)	D Threshold (mV)	Time (sec)	D Threshold (mV)
	-15	0	-15	0	-15	0	-15	0	-15	0	-15	0	-15	0	-15	0	-15	0	-15	0	-15	0	-15	0
	4	-0.487	2	4.594	2	0.486	2	3.32	2	-0.487	4	-0.387	3	-2.54	2	0.1	2	-0.587	2	-0.493	2	-0.98	2	1.073
	6	-0.68	4	0.587	4		4	2.44	4	-0.873	6	-0.587	5	-2.147	4	-0.68	4	-1.66	4	-1.373	4	-1.174	4	-0.393
	8	-1.074	6	0.294	6	0.973	6	1.167	6	-0.68	8	-0.973	7	-2.347	6	-0.68	6	-1.567	6	-0.1	6	-0.394	6	-0.293
	10	-0.78	8	0.494	8	0.78	8	-0.1	8	-0.393	10	-0.587	9	-2.347	8	-0.873	8	-0.78	8	0.093	8	-0.98	8	-0.687
	12	-0.587	10	0.687	10	1.173	10	0.193	10	-0.68	12	-0.78	11	-2.247	10	-0.293	10	-0.98	10	0.093	10	-0.687	10	-0.193
	14	-0.487	12	0.294	12	-0.1	12	0.68	18	-0.58	14	-0.487	13	-1.56	12	-0.093	12	-0.393	12	-0.293	12	-0.394	12	-0.487
	16	-0.874	14	0.1	16	-0.687	14	0	24	-0.387	16	-0.587	15	-1.467	14	-0.293	14	-0.1	14	-0.293	14	-0.78	14	0.193
	18	-1.367	16	-0.293	20	1.466	16	0	32	-0.78	18	-0.68	17	-1.273	16	0.1	16	-0.293	16	0.193	16	-0.587	16	-0.1
	20	-0.194	18	-0.093	26	0.88	18	-1.08	58	-1.267	20	-0.68	19	-1.467	18	-0.193	18	-0.1	18	-0.2	18	-0.294	18	-0.1
	39	-0.78	20	0.587	30	0.386	20	0.78	78	-1.367	30	-0.487	21	-1.76	20	-0.386	29	-0.587	20	0	20	-0.78	20	-0.293
	63	-1.074	34	0.294	37	0	41	-0.1			50	-0.78	23	-1.56	25	-0.293	54	0.093	34	-0.2	44	-0.294	35	0.193
	95	-0.874	49	0	57	0.88	73	0.587			76	-0.487	25	-1.467	49	0.394	94	0	58	-0.493	65	-0.294	54	-0.487
	172	-1.954	69	0.687	77	-0.394	130	-0.98			122	-1.173	27	-1.07	113	0.88	169	1.267	86	-0.88	91	-0.2	84	-0.587
	292	-1.954	167	0.687	78	-1.367	271	-1.76			214	-0.093	29	-1.073	196	1.274	302	0.68	164	-0.393	151	-0.1	139	-0.293
	413	-3.22	262	0.587			457	-2.54			334	-0.78	31	-1.467	397	1.074	569	0	371	-0.687	234	0.193	184	0.193
			587	-0.386							424	-0.293	43	-0.687	561	0.587			578	-0.687	448	0.193
													73	-1.273							560	0.386
													93	-0.393
													113	-0.193
													133	-0.88
	Wildtype + GNE-4076 (n=11)
	Cell 1		Cell 2		Cell 3		Cell 4		Cell 5		Cell 6		Cell 7		Cell 8		Cell 9		Cell 10		Cell 11
	Time (sec)	D Threshold (mV)	Time (sec)	D Threshold (mV)	Time (sec)	D Threshold (mV)	Time (sec)	D Threshold (mV)	Time (sec)	D Threshold (mV)	Time (sec)	D Threshold (mV)	Time (sec)	D Threshold (mV)	Time (sec)	D Threshold (mV)	Time (sec)	D Threshold (mV)	Time (sec)	D Threshold (mV)	Time (sec)	D Threshold (mV)
	-15	0	-15	0	-15	0	-15	0	-15	0	-15	0	-15	0	-15	0	-15	0	-15	0	-15	0
	2	18.654	2	29.393	2	11.82	2	18.653	4	14.847	2	24.22	2	20.707	2	14.353	2	17.58	4	18.947	2	22.753
	4	14.647	4	23.24	4	11.914	4	10.84	6	14.554	4	19.34	4	17.387	4	14.553	4	12.794	6	18.46	4	18.453
	6	15.427	6	22.46	6	9.474	6	10.74	8	14.94	6	16.8	6	17.187	6	14.16	6	11.334	8	16.407	6	16.6
	8	14.26	8	22.067	8	9.667	8	8.106	10	14.26	8	15.24	8	15.433	8	12.986	8	11.72	10	16.407	8	14.746
	10	14.94	10	20.313	10	9.867	10	10.06	12	12.694	10	14.653	10	15.04	10	12.306	10	11.72	12	15.92	10	13.766
	12	13.767	14	19.627	12	8.107	12	8.4	14	12.694	12	13.673	12	14.353	12	11.326	12	10.84	14	16.214	12	13.673
	14	13.38	18	20.507	14	7.714	14	8.986	16	13.087	14	14.36	14	14.353	14	12.5	14	11.04	16	15.92	14	11.813
	16	13.574	22	18.747	18	7.52	16	8.006	18	11.427	16	13.48	16	13.187	16	10.546	16	10.16	18	16.314	16	11.72
	18	14.26	26	18.36	22	7.127	18	7.713	20	11.72	18	12.307	18	12.987	18	9.373	18	9.767	20	15.534	18	12.206
	20	12.6	30	17.087	28	6.054	20	7.126	34	8.494	20	11.92	20	11.427	20	9.766	20	8.887	52	9.38	20	11.326
	22	12.987	34	16.793	38	6.447	30	5.566	65	5.374	40	6.253	32	10.06	40	8.206	43	8.307	134	4.787	44	6.54
	26	11.234	38	15.913	48	2.934	50	4.2	129	1.66	62	3.813	57	6.253	64	3.806	68	4.494	305	1.86	95	2.146
	30	11.62	42	17.773	58	1.954	67	2.54	219	1.954	106	0.787	98	2.44	96	0.78	94	3.027	425	3.52	198	0.486
	34	12.694	53	16.113	88	0.88	97	2.146	373	0.687	166	-0.287	143	0.98	171	-0.1	118	2.447			379	0.193
	38	11.427	63	11.133	108	0.487	142	0.393	493	-0.1	290	-0.973	208	0.687	269	-1.074	181	1.174			594	-0.78
	42	9.18	83	5.86	138	-0.013	199	-0.294			414	-0.873	323	-0.1	369	-0.974	307	-0.873
	56	9.574	93	5.367	198	-1.466	319	0.193			534	-1.46	443	-0.1	489	-0.88	458	-0.68
	76	8.787	113	3.707	228	-1.56	387	0.1			615	-1.46			549	-1.267
	96	7.327	152	1.267			507	0.393
	116	6.447	182	0.487
	136	4.3	212	0.487
	176	3.32	242	-0.293
	236	2.147	302	-0.88
	296	1.76	362	-1.953
	356	1.864	422	-2.053
	446	1.267	482	-1.66
	596	1.174
	Scn8aSR/SR KI + GNE-4076 (n=11)
	Cell 1		Cell 2		Cell 3		Cell 4		Cell 5		Cell 6		Cell 7		Cell 8		Cell 9		Cell 10		Cell 11
	Time (sec)	D Threshold (mV)	Time (sec)	D Threshold (mV)	Time (sec)	D Threshold (mV)	Time (sec)	D Threshold (mV)	Time (sec)	D Threshold (mV)	Time (sec)	D Threshold (mV)	Time (sec)	D Threshold (mV)	Time (sec)	D Threshold (mV)	Time (sec)	D Threshold (mV)	Time (sec)	D Threshold (mV)	Time (sec)	D Threshold (mV)
	-15	0	-15	0	-15	0	-15	0	-15	0	-15	0	-15	0	-15	0	-15	0	-15	0	-15	0
	3	0.487	3	-1.027	3	-0.51	2	0.88	3	-2.933	2	0.1	4	-0.294	2	2.6137	4	-1.854	2	1.66	2	-0.2
	8	0.244	8	-0.587	5	-0.417	4	-0.974	5	-1.466	4	-0.193	6	-0.387	4	0.093	6	-1.954	4	-0.393	4	-0.787
	13	0.29	13	-0.197	7	-0.217	6	-0.78	7	-1.073	6	0.687	8	0.2	6	0	8	-1.367	6	-0.487	6	-0.787
	18	0.437	18	0.34	9	-0.123	8	-0.68	9	-0.1	8	0	10	0.493	8	0.093	10	-0.88	8	0	8	-0.787
	23	0.83	23	-0.44	11	-0.417	10	-0.68	11	-0.493	10	0	12	1.08	10	0.193	12	-0.78	10	-0.1	10	-0.394
	28	0.684	28	-0.05	13	-0.317	12	-0.68	13	-0.293	12	-0.58	14	0.88	12	-0.293	14	-0.487	12	-0.1	12	0.293
	33	0.78	33	0	15	-0.51	14	-1.56	15	0	14	0.293	16	0.88	14	0.487	16	-0.294	14	0	14	0.486
	38	0.684	38	0.293	17	-0.317	16	-0.88	17	-0.1	16	0.2	18	0.293	16	0.88	18	-1.167	16	0	16	-0.1
	43	1.464	43	0.293	19	0.17	18	-0.78	21	-0.686	18	0.1	20	0.586	18	0.487	20	-0.68	18	-0.68	18	-0.1
	48	1.22	48	0.197	21	-0.51	20	-1.367	25	0.974	24	0.393	29	0.1	20	0.68	30	-1.167	20	-0.587	20	0.293
	53	0.927	53	0.733	23	0.17	22	-0.78	29	-0.686	28	1.173	40	-0.194	47	0.387	46	-1.367	30	-0.587	28	-0.394
	58	1.514	58	0.293	25	0.077	30	-0.974	39	-0.2	33	0.787	59	0.1	109	0.193	71	-1.56	42	-0.587	42	-0.2
	63	1.317	63	0.683	27	-0.023	38	-0.78	49	-0.293	38	0.393	83	-0.487	219	0.387	102	-1.56	70	-0.393	67	-0.494
	68	1.414	68	0.587	29	-0.217	44	-0.88	73	-0.293	43	0.88	109	0	433	0.973	162	-2.147	89	-0.393	98	-0.2
	73	1.12	73	0.78	31	0.27	60	-1.267	103	-0.293	58	0.98	141	-0.094	532	-0.293	300	-1.46	134	-0.88	143	-0.787
	78	1.267	78	0.487	45	0.077	70	-0.387	123	0	73	0.1	209	-0.78	592	-0.2	420	-0.974	227	-0.587	251	-0.294
	83	1.317	83	0.927	61	-0.317	90	-0.88	143	0.387	88	1.567	299	0.2					400	0	436	-0.2
	88	1.61	88	0.44	92	0.37	120	-0.487	163	0.487	98	1.76	452	-0.094					460	-0.78	496	-1.367
	93	1.17	123	0.633	102	0.077	180	0.193			128	1.467	532	0.2
			178	0.733	122	0.27	300	0.293			158	0.787
					132	0.27					188	0.293
					172	0.077					218	1.467
					210	0.463					248	0.293
					300	0.463					278	1.567
					430	0.563					308	1.567
											350	1.08
											362	0.88
											421	1.76
											481	1.467
											541	1.953
	Scn2aSR/SR KI + GNE-4076 (n=11)
	Cell 1		Cell 2		Cell 3		Cell 4		Cell 5		Cell 6		Cell 7		Cell 8		Cell 9		Cell 10		Cell 11
	Time (sec)	D Threshold (mV)	Time (sec)	D Threshold (mV)	Time (sec)	D Threshold (mV)	Time (sec)	D Threshold (mV)	Time (sec)	D Threshold (mV)	Time (sec)	D Threshold (mV)	Time (sec)	D Threshold (mV)	Time (sec)	D Threshold (mV)	Time (sec)	D Threshold (mV)	Time (sec)	D Threshold (mV)	Time (sec)	D Threshold (mV)
	-15	0	-15	0	-15	0	-15	0	-15	0	-15	0	-15	0	-15	0	-15	0	-15	0	-15	0
	4	12.306	2	15.234	2	4.886	2	8.1	2	4.933	2	6.493	2	4.347	2	3.32	2	9.08	2	13.087	2	18.847
	6	10.646	4	11.72	4	4.3	4	6.933	4	3.856	4	6.833	4	3.76	4	3.566	4	7.807	4	8.3	4	11.427
	8	10.153	6	10.447	6	3.713	6	6.246	6	4.103	6	6.59	8	3.517	6	3.516	6	6.247	6	8.787	6	12.694
	10	8.593	8	9.567	8	3.32	8	5.66	8	4.103	10	4.98	13	4.394	9	4.346	8	6.054	8	8.887	8	12.107
	12	8.693	10	9.374	10	3.126	10	5.86	10	3.663	13	4.833	15	3.76	19	3.32	10	5.954	10	8.107	10	11.72
	14	8.886	12	8.494	13	1.953	12	5.073	13	4.103	21	5.663	19	3.467	48	3.126	12	5.854	12	9.08	12	10.154
	16	8.006	14	6.934	17	3.026	14	4.88	17	3.173	39	3.32	27	3.37	58	2.003	14	5.174	14	8.107	14	10.354
	18	8.106	16	7.614	23	2.053	16	5.466	31	2.59	48	2.243	31	3.957	78	1.466	16	5.174	16	8.394	16	9.96
	20	9.08	18	7.614	30	1.953	18	5.073	39	2.003	68	2	37	3.957	93	0.44	18	5.274	18	8.394	18	9.274
	28	6.253	20	8.594	36	1.76	20	5.073	58	0.243	138	1.266	43	3.664	193	0.49	20	4.587	20	7.907	20	9.567
	50	4.1	22	7.32	65	0.1	22	4.393	88	-0.684	198	1.22	73	1.66	343	-0.684	30	3.22	29	6.834	46	6.54
	65	4.006	27	6.934	95	-0.974	24	3.706	138	-1.17			138	1.417			54	1.854	47	5.954	109	3.42
	118	0.486	35	5.467	125	-0.88	27	4	258	-2.734			228	-0.733			80	1.074	72	4.494	226	0.974
	178	1.073	51	5.274	155	-1.66	28	4.1	348	-2.54			288	-1.073			104	0.58	93	2.927	316	0.094
	276	-1.174	69	4.294	185	-0.974	58	2.533					408	-1.856			155	0	155	1.46	443	0.974
	320	-1.66	87	2.54			88	0.586									275	-0.98	240	0.194	607	0.094
	551	-0.487	89	3.127			128	-0.394									335	-0.88	342	-0.1
	581	-0.88	94	3.027			158	-0.2									425	-1.466	462	0.094
			124	2.44			188	-0.687									485	-1.86
			154	1.367			218	-1.08									647	-1.953
			184	1.467
			214	1.074
	8a/2aSR/SR KI + GNE-4076 (n=10)
	Cell 1		Cell 2		Cell 3		Cell 4		Cell 5		Cell 6		Cell 7		Cell 8		Cell 9		Cell 10
	Time (sec)	D Threshold (mV)	Time (sec)	D Threshold (mV)	Time (sec)	D Threshold (mV)	Time (sec)	D Threshold (mV)	Time (sec)	D Threshold (mV)	Time (sec)	D Threshold (mV)	Time (sec)	D Threshold (mV)	Time (sec)	D Threshold (mV)	Time (sec)	D Threshold (mV)	Time (sec)	D Threshold (mV)
	-15	0	-15	0	-15	0	-15	0	-15	0	-15	0	-15	0	-15	0	-15	0	-15	0
	2	-0.98	2	-1.367	2	-2.147	2	-0.1	2		2	1.267	4	-1.76	2	-0.294	2	0.393	2	1.173
	4	-0.587	6	-1.173	6	-2.147	4	-0.393	4	1.074	4	-0.393	6	-0.493	4	-1.66	4	-0.487	4	-1.56
	6	-0.294	10	-1.72	10	-2.053	6	-0.686	6	1.66	6	-0.293	8	-1.173	6	-1.66	6	-0.293	6	-1.267
	8	0	14	-1.173	18	-0.98	8	-0.393	8	1.854	8	-0.293	10	-0.88	8	-1.66	8	-0.193	8	-0.973
	10	0.386	18	-1.367	30	-1.137	10	0.094	10	0.394	12	-0.1	12	-0.88	10	-1.274	10	-0.393	10	-0.973
	12	-0.1	30	-1.173	42	-0.393	12	-0.1	12	1.174	14	-1.273	14	-0.393	12	-1.954	12	0	12	-0.193
	16	-0.1	54	-0.973	59	-0.98	14	-0.293	14	1.56	16	-0.493	16	-0.98	14	-0.98	14	-0.393	14	-0.387
	22	0.293	70	-0.293	109	-0.98	16	-0.1	16	0.687	18	-0.2	18	-0.787	16	-1.66	16	-0.487	16	-0.093
	33	0.386	90	-0.293	149	-1.173	18	0.094	18	0.487	20	-0.393	20	-0.687	18	-0.787	18	-0.1	18	-0.873
	53	-0.294	110	-0.78	179	-0.193	20	-0.1	20	0.78	40	-0.88	40	-0.393	20	-1.367	20	-0.193	20	-0.487
	73	-0.487	172	-0.587	205	-0.587	40	0.194	35	0.1	65	-0.78	71	-0.787	27	-1.08	27	-0.193	41	0
	93	-0.687	232	-0.293	235	-0.587	82	-0.393	69	0.1	119	-0.98	184	-0.98	48	-0.98	41	-0.587	91	-0.293
	153	-0.2			265	-0.487	183	-0.393	143	0.074	194	-0.78	288	-0.493	91	-0.787	61	-0.193	171	-1.167
	213	0.293					273	0.094	243	0.587	318	0	408	0.68	154	-1.174	136	0.293	343	-0.487
	273	-0.487					398	0	332	-0.1	552	0.093	528	-0.1	274	-1.467	255	0.1	523	-1.167
	333	0.193							464	0.687					475	-1.367	345	0.487	643	-1.46
	363	0.093															408	0.687
	393	-0.294															588	-0.1

## Sheet: Figure 3E
	Wildtype no drug (n=12 cells)	Wildtype + GNE-4076 (n=12 cells)	Scn8aSR/SR KI + GNE-4076 (n=11 cells)	Scn2aSR/SR KI + GNE-4076 (n=11 cells)	8a/2aSR/SR KI + GNE-4076 (n=11 cells)
	0.226333	10.5932	0.3635	7.85	-0.1
	-0.63	13.5162	0.0715	2.4895	-0.4395
	-0.6428	20.067	-0.2435	5.113	-1.42
	-1.44175	7.78033	-1.0534	3.638	-1.5165
	-0.173	8.0462	-0.26975	5.15867	-0.4918
	-0.2215	12.3244	0.00325	3.87367	-0.7454
	-0.567	13.148	0.7438	3.833	-1.3496
	-0.1574	13.2614	0.4482	5.2126	-0.2346
	0.076	10.7022	-0.6816	8.5542	-0.4066
	-0.7018	10.1388	-0.2734	8.3764	-0.0998
	-0.1186	15.9804	0.1744	9.8618	0.9376
	0.119	12.1476

## Sheet: Figure 3F
	Wildtype, no drug control (n=12)
	Cell 1		Cell 2		Cell 3		Cell 4		Cell 5		Cell 6		Cell 7		Cell 8		Cell 9		Cell 10		Cell 11		Cell 12
	Time (sec)	D dV/dt (V/s)	Time (sec)	D dV/dt (V/s)	Time (sec)	D dV/dt (V/s)	Time (sec)	D dV/dt (V/s)	Time (sec)	D dV/dt (V/s)	Time (sec)	D dV/dt (V/s)	Time (sec)	D dV/dt (V/s)	Time (sec)	D dV/dt (V/s)	Time (sec)	D dV/dt (V/s)	Time (sec)	D dV/dt (V/s)	Time (sec)	D dV/dt (V/s)	Time (sec)	D dV/dt (V/s)
	-15	0	-15	0	-15	0	-15	0	-15	0	-15	0	-15	0	-15	0	-15	0	-15	0	-15	0	-15	0
	4	-117.17	2	-300.34	2	-178.17	2	-271	2	-283.17	4	-112.33	3	-119.67	2	-285.67	2	-346.67	2	-175.67	2	-275.83	2	-217.16
	6	-97.84	4	-161.17	4	-158.5	4	-168.5	4	-144.17	6	-88	5	-100.17	4	-166	4	-205	4	-117.17	4	-161.16	4	-105
	8	-78.34	6	-122.17	6	-117	6	-131.84	6	-112.17	8	-80.67	7	-90.34	6	-131.83	6	-163.5	6	-85.33	6	-109.83	6	-87.83
	10	-83	8	-102.5	8	-102.34	8	-110	8	-90.17	10	-83	9	-80.67	8	-114.83	8	-136.67	8	-87.67	8	-102.66	8	-65.83
	12	-70.84	10	-100.17	10	-95.17	10	-97.67	10	-70.67	12	-63.5	11	-78.17	10	-112.33	10	-124.5	10	-80.33	10	-90.33	10	-56
	14	-66	12	-78.17	12	-70.67	12	-107.5	18	-56.12	14	-63.5	13	-75.84	12	-104.83	12	-114.67	12	-58.33	12	-80.66	12	-56
	16	-58.67	14	-75.67	16	-58.5	14	-95.34	24	-70.84	16	-66	15	-80.67	14	-92.83	14	-97.67	14	-63.33	14	-80.5	14	-41.5
	18	-63.5	16	-73.34	20	-68.17	16	-78.17	32	-58.5	18	-58.67	17	-75.84	16	-90.33	16	-90.34	16	-63.33	16	-70.83	16	-51.16
	20	-48.84	18	-61	26	-56	18	-68.34	58	-44	20	-41.5	19	-75.84	18	-90.17	18	-87.84	18	-63.33	18	-66	18	-46.33
	39	-39.17	20	-73.17	30	-43.84	20	-73.17	78	-31.67	30	-44	21	-73.34	20	-92.83	29	-56.17	20	-53.67	20	-53.83	20	-36.5
	63	-36.67	34	-58.67	37	-48.67	41	-41.5			50	-24.5	23	-75.84	25	-75.67	54	-39	34	-48.67	44	-22	35	-31.66
	95	-12.34	49	-31.67	57	-46.34	73	-36.67			76	-24.33	25	-73.34	49	-48.83	94	-17.17	58	-41.33	65	-24.5	54	-19.5
	172	-24.5	69	-44	77	-31.67	130	-27			122	-12.17	27	-78.17	113	-31.67	169	-22	86	-34	91	-9.66	84	-26.83
	292	-19.67	167	-39	78	-17	271	-26.84			214	-7.33	29	-73.34	196	-26.83	302	-26.84	164	-34	151	-12.33	139	-12.16
	413	-14.84	262	-36.67			457	-36.67			334	-9.83	31	-73.34	397	-22	569	-19.5	371	-31.5	234	-9.83	184	-26.66
			587	-31.84							424	-5	43	-73.34	561	-19.5			578	-34	448	-9.83
													73	-61.17							560	-4.83
													93	-63.67
													113	-63.5
													133	-56.34
	Wildtype + GNE-4076 (n=11)
	Cell 1		Cell 2		Cell 3		Cell 4		Cell 5		Cell 6		Cell 7		Cell 8		Cell 9		Cell 10		Cell 11
	Time (sec)	D dV/dt (V/s)	Time (sec)	D dV/dt (V/s)	Time (sec)	D dV/dt (V/s)	Time (sec)	D dV/dt (V/s)	Time (sec)	D dV/dt (V/s)	Time (sec)	D dV/dt (V/s)	Time (sec)	D dV/dt (V/s)	Time (sec)	D dV/dt (V/s)	Time (sec)	D dV/dt (V/s)	Time (sec)	D dV/dt (V/s)	Time (sec)	D dV/dt (V/s)
	-15	0	-15	0	-15	0	-15	0	-15	0	-15	0	-15	0	-15	0	-15	0	-15	0	-15	0
	2	-485.837	2	-493.163	2	-417.33	2	-520.003	4	-383.333	2	-527.33	2	-495.67	2	-398	2	-461.337	4	-432.17	2	-532.33
	4	-432.17	4	-449.163	4	-388.17	4	-385.84	6	-351.5	4	-461.33	4	-434.67	4	-361.33	4	-339.17	6	-400.34	4	-459.16
	6	-407.67	6	-417.5	6	-375.83	6	-354	8	-324.67	6	-434.66	6	-398	6	-344.33	6	-327	8	-378.34	6	-422.5
	8	-395.5	8	-405.16	8	-346.5	8	-324.67	10	-319.83	8	-412.66	8	-381	8	-329.66	8	-322.17	10	-358.84	8	-405.5
	10	-398	10	-393	10	-334.5	10	-315	12	-295.5	10	-388.33	10	-361.5	10	-312.5	10	-307.5	12	-356.5	10	-390.66
	12	-378.5	14	-376	12	-312.33	12	-297.84	14	-290.5	12	-378.5	12	-354	12	-307.66	12	-288.17	14	-341.84	12	-376
	14	-363.67	18	-371	14	-300.17	14	-293	16	-280.67	14	-371.16	14	-344.34	14	-290.66	14	-288.17	16	-339.34	14	-359
	16	-359	22	-368.66	18	-287.83	16	-283.17	18	-276	16	-361.33	16	-332.17	16	-280.83	16	-283.17	18	-332	16	-344.33
	18	-366.34	26	-356.33	22	-258.67	18	-266	20	-280.83	18	-356.5	18	-320	18	-263.66	18	-263.67	20	-324.67	18	-329.66
	20	-358.84	30	-346.66	28	-236.67	20	-263.67	34	-227.17	20	-344.16	20	-307.67	20	-271	20	-258.84	52	-227	20	-334.5
	22	-346.67	34	-339.33	38	-212.33	30	-200.17	65	-171	40	-236.83	32	-266.17	40	-200.16	43	-205	134	-109.67	44	-222.33
	26	-327.17	38	-332	48	-136.5	50	-139.17	129	-85.5	62	-192.83	57	-188	64	-151.5	68	-161.17	305	-56	95	-127.16
	30	-329.67	42	-332	58	-107.33	67	-112.34	219	-46.5	106	-95.33	98	-129.34	96	-107.33	94	-109.84	425	-58.5	198	-63.66
	34	-327	53	-310	88	-68.33	97	-51.34	373	-24.5	166	-66	143	-90.34	171	-70.83	118	-100.17			379	-36.66
	38	-317.34	63	-268.5	108	-51	142	-26.84	493	-26.83	290	-34.33	208	-56.17	269	-29.33	181	-70.67			594	-48.83
	42	-307.67	83	-214.83	138	-29.17	199	0			414	-7.33	323	-26.84	369	-29.33	307	-31.67
	56	-276	93	-197.66	198	-24.33	319	-14.5			534	-5	443	-2.5	489	-24.5	458	-31.67
	76	-229.5	113	-173.33	228	-9.67	387	-19.5			615	-2.5			549	-31.83
	96	-200.17	152	-136.66			507	-21.84
	116	-175.84	182	-122.16
	136	-146.34	212	-105
	176	-112.34	242	-102.5
	236	-83	302	-85.33
	296	-68.34	362	-80.5
	356	-61	422	-68.33
	446	-56.17	482	-58.66
	596	-56.17
	Scn8aSR/SR KI + GNE-4076 (n=11)
	Cell 1		Cell 2		Cell 3		Cell 4		Cell 5		Cell 6		Cell 7		Cell 8		Cell 9		Cell 10		Cell 11
	Time (sec)	D dV/dt (V/s)	Time (sec)	D dV/dt (V/s)	Time (sec)	D dV/dt (V/s)	Time (sec)	D dV/dt (V/s)	Time (sec)	D dV/dt (V/s)	Time (sec)	D dV/dt (V/s)	Time (sec)	D dV/dt (V/s)	Time (sec)	D dV/dt (V/s)	Time (sec)	D dV/dt (V/s)	Time (sec)	D dV/dt (V/s)	Time (sec)	D dV/dt (V/s)
	-15	0	-15	0	-15	0	-15	0	-15	0	-15	0	-15	0	-15	0	-15	0	-15	0	-15	0
	3	-286.91	3	-295.42	3	-271	2	-410.33	3	-371	2	-324.66	4	-271	2	-395.337	4	-271	2	-336.84	2	-380.83
	8	-213.66	8	-220.92	5	-261.17	4	-302.83	5	-325	4	-302.83	6	-246.5	4	-290.34	6	-239.17	4	-256.34	4	-290.66
	13	-191.66	13	-198.92	7	-244.17	6	-268.66	7	-293	6	-283.16	8	-217.33	6	-261.17	8	-217.34	6	-231.84	6	-263.66
	18	-174.58	18	-179.42	9	-234.5	8	-256.5	9	-271	8	-270.83	10	-202.67	8	-239.17	10	-212.34	8	-222.17	8	-254
	23	-164.83	23	-173.34	11	-229.5	10	-239.33	11	-251.5	10	-258.83	12	-195.33	10	-222.17	12	-190.5	10	-202.67	10	-229.5
	28	-156.33	28	-164.84	13	-232.34	12	-234.5	13	-236.83	12	-258.66	14	-175.83	12	-212.34	14	-190.5	12	-197.67	12	-231.83
	33	-150.25	33	-159.92	15	-214.84	14	-222.33	15	-231.83	14	-244.16	16	-173.5	14	-212.34	16	-178.17	14	-185.5	14	-217.16
	38	-144.08	38	-155	17	-212.5	16	-214.83	17	-224.67	16	-241.66	18	-163.67	16	-192.67	18	-171	16	-180.67	16	-202.5
	43	-142.83	43	-151.34	19	-207.5	18	-205.16	21	-202.67	18	-231.83	20	-153.83	18	-192.84	20	-166	18	-166	18	-200.16
	48	-135.58	48	-155	21	-207.5	20	-198	25	-200.17	24	-214.83	29	-136.83	20	-173.17	30	-144	20	-161.17	20	-192.83
	53	-133.08	53	-153.84	23	-202.67	22	-200.16	29	-175.83	28	-202.66	40	-117.17	47	-131.67	46	-117.17	30	-139	28	-170.83
	58	-130.66	58	-148.92	25	-197.84	30	-183.16	39	-170.83	33	-188	59	-97.67	109	-82.84	71	-85.34	42	-114.84	42	-151.33
	63	-122.08	63	-144	27	-202.67	38	-178.33	49	-168.33	38	-173.33	83	-68.5	219	-46.34	102	-68.34	70	-95.17	67	-129.5
	68	-118.5	68	-144	29	-197.84	44	-168.5	73	-171	43	-158.66	109	-53.83	433	-46.34	162	-29.34	89	-73.34	98	-92.66
	73	-117.25	73	-144	31	-195.34	60	-141.66	103	-127	58	-131.83	141	-29.33	532	-9.67	300	-19.5	134	-56.17	143	-61
	78	-114.75	78	-142.84	45	-185.5	70	-124.66	123	-107.33	73	-107.33	209	-26.83	592	-19.5	420	-4.84	227	-19.5	251	-46.33
	83	-113.58	83	-139.09	61	-178.34	90	-105	143	-85.33	88	-97.66	299	-7.33					400	4.83	436	-14.5
	88	-117.25	88	-139.17	92	-151.5	120	-88	163	-95.17	98	-90.33	452	0					460	2.5	496	-22
	93	-108.66	123	-131.84	102	-134.34	180	-85.5			128	-80.5	532	-14.67
			178	-119.59	122	-119.67	300	-78.16			158	-66
					132	-117.17					188	-51.33
					172	-110					218	-53.66
					210	-92.84					248	-46.33
					300	-83.17					278	-56.16
					430	-85.5					308	-48.83
											350	-53.66
											362	-58.66
											421	-46.33
											481	-46.33
											541	-51.16
	Scn2aSR/SR KI + GNE-4076 (n=11)
	Cell 1		Cell 2		Cell 3		Cell 4		Cell 5		Cell 6		Cell 7		Cell 8		Cell 9		Cell 10		Cell 11
	Time (sec)	D dV/dt (V/s)	Time (sec)	D dV/dt (V/s)	Time (sec)	D dV/dt (V/s)	Time (sec)	D dV/dt (V/s)	Time (sec)	D dV/dt (V/s)	Time (sec)	D dV/dt (V/s)	Time (sec)	D dV/dt (V/s)	Time (sec)	D dV/dt (V/s)	Time (sec)	D dV/dt (V/s)	Time (sec)	D dV/dt (V/s)	Time (sec)	D dV/dt (V/s)
	-15	0	-15	0	-15	0	-15	0	-15	0	-15	0	-15	0	-15	0	-15	0	-15	0	-15	0
	4	-256.33	2	-346.66	2	-310	2	-295.67	2	-222.16	2	-218.5	2	-229.83	2	-213.66	2	-324.67	2	-354.16	2	-441.837
	6	-237	4	-237.5	4	-200.17	4	-244.33	4	-167.25	4	-173.41	4	-161.42	4	-152.58	4	-227	4	-217.33	4	-305.17
	8	-197.83	6	-190.33	6	-153.67	6	-217.5	6	-151.33	6	-133	8	-128.5	6	-135.5	6	-180.67	6	-195.33	6	-283.17
	10	-188.16	8	-173.33	8	-139.67	8	-197.83	8	-139.16	10	-127	13	-122.33	9	-126.91	8	-171	8	-166	8	-253.84
	12	-185.66	10	-153.66	10	-129.34	10	-183.33	10	-134.25	13	-111.08	15	-116.25	19	-119.58	10	-149	10	-166	10	-229.5
	14	-166	12	-146.33	13	-117.17	12	-163.67	13	-124.5	21	-112.33	19	-115	48	-97.66	12	-153.83	12	-149	12	-224.5
	16	-168.5	14	-139	17	-114.67	14	-161.33	17	-123.33	39	-70.83	27	-99.17	58	-89.08	14	-136.67	14	-144.16	14	-200.17
	18	-161.16	16	-134.16	23	-117.34	16	-149	31	-112.33	48	-66	31	-85.75	78	-69.58	16	-127	16	-139.33	16	-207.34
	20	-161.16	18	-126.83	30	-114.67	18	-129.5	39	-91.58	68	-57.41	37	-91.83	93	-68.33	18	-126.83	18	-151.33	18	-192.84
	28	-122	20	-126.83	36	-90.34	20	-132	58	-48.83	138	-44	43	-80.92	193	-45.16	20	-129.33	20	-136.83	20	-195.17
	50	-92.83	22	-119.5	65	-66	22	-124.67	88	-47.58	198	-42.75	73	-50.25	343	-65.83	30	-107.33	29	-136.83	46	-131.84
	65	-83.16	27	-109.66	95	-65.84	24	-117.33	138	-44			138	-45.42			54	-78.17	47	-107.5	109	-61
	118	-36.66	35	-102.5	125	-44	27	-115	258	-24.41			228	-22.25			80	-61	72	-100.16	226	-41.5
	178	-17.16	51	-97.5	155	-41.5	28	-112.5	348	-18.33			288	-21.08			104	-41.5	93	-83	316	-21.84
	276	0	69	-95	185	-31.67	58	-44.17					408	-4			155	-34.17	155	-44	443	-17
	320	-0.16	87	-82.83			88	-36.67									275	-17	240	-24.5	607	-19.5
	551	7.17	89	-95.16			128	-29.5									335	-12.33	342	-29.33
	581	-2.5	94	-85.33			158	-27									425	-22	462	-14.83
			124	-58.5			188	-24.67									485	-24.33
			154	-51.16			218	-17.33									647	-29.33
			184	-46.16
			214	-34
	8a/2aSR/SR KI + GNE-4076 (n=10)
	Cell 1		Cell 2		Cell 3		Cell 4		Cell 5		Cell 6		Cell 7		Cell 8		Cell 9		Cell 10
	Time (sec)	D dV/dt (V/s)	Time (sec)	D dV/dt (V/s)	Time (sec)	D dV/dt (V/s)	Time (sec)	D dV/dt (V/s)	Time (sec)	D dV/dt (V/s)	Time (sec)	D dV/dt (V/s)	Time (sec)	D dV/dt (V/s)	Time (sec)	D dV/dt (V/s)	Time (sec)	D dV/dt (V/s)	Time (sec)	D dV/dt (V/s)
	-15	0	-15	0	-15	0	-15	0	-15	0	-15	0	-15	0	-15	0	-15	0	-15	0
	2	-158.67	2	-114.67	2	-132	2	-266	2		2	-297.84	4	-122	2	-258.83	2	-224.67	2	-268.67
	4	-126.83	6	-73.17	6	-66	4	-129.34	4	-168.5	4	-183.17	6	-100.17	4	-129.33	4	-119.67	4	-144
	6	-110	10	-51.17	10	-51.33	6	-112.17	6	-139.17	6	-139.17	8	-80.67	6	-102.5	6	-90.34	6	-109.84
	8	-90.33	14	-41.5	18	-34.17	8	-97.5	8	-122	8	-119.67	10	-73.34	8	-83	8	-80.5	8	-102.67
	10	-90.33	18	-31.67	30	-26.83	10	-92.67	10	-109.84	12	-92.84	12	-61	10	-75.66	10	-61	10	-102.67
	12	-83	30	-29.17	42	-34.33	12	-78.17	12	-112.34	14	-90.34	14	-51.34	12	-56.33	12	-58.5	12	-95.34
	16	-73.33	54	-31.67	59	-26.83	14	-78	14	-107.5	16	-88	16	-56.17	14	-58.66	14	-48.84	14	-92.84
	22	-65.83	70	-34.17	109	-12.17	16	-80.5	16	-97.67	18	-80.5	18	-48.84	16	-56.16	16	-58.67	16	-92.84
	33	-44	90	-34	149	-9.83	18	-70.67	18	-97.67	20	-80.5	20	-56.17	18	-56.33	18	-44	18	-92.84
	53	-41.5	110	-21.84	179	-9.822	20	-68.17	20	-97.67	40	-56.17	40	-29.34	20	-44	20	-41.5	20	-100.17
	73	-41.5	172	-19.5	205	-19.67	40	-48.84	35	-63.5	65	-51.17	71	-17.17	27	-36.66	27	-41.5	41	-83
	93	-29.33	232	-9.67	235	-4.83	82	-36.5	69	-68.34	119	-21.84	184	-22	48	-34.16	41	-39	91	-73.34
	153	-22			265	-14.67	183	-39	143	-61	194	-12.17	288	-22	91	-22.16	61	-19.5	171	-19.5
	213	-24.5					273	-24.34	243	-44	318	-9.84	408	-36.67	154	-22.16	136	-24.34	343	-19.5
	273	-24.5					398	-4.84	332	-29.34	552	-26.84	528	-22	274	-22	255	-7.34	523	-12.17
	333	-17.17							464	-39.17					475	-24.5	345	-9.84	643	-19.5
	363	-9.83															408	0
	393	-9.83															588	9.83

## Sheet: Figure 3G
	Wildtype no drug (n=12 cells)	Wildtype + GNE-4076 (n=12 cells)	Scn8aSR/SR KI + GNE-4076 (n=11 cells)	Scn2aSR/SR KI + GNE-4076 (n=11 cells)	8a/2aSR/SR KI + GNE-4076 (n=11 cells)
	-65.78	-286.832	-183.12	-134.63	-78.165
	-63.395	-365.27	-189.17	-115.92	-45.17
	-58.634	-373.5	-216.795	-147.1	-41.4467
	-77.0475	-300.11	-214.964	-123.915	-42.75
	-94.198	-280.736	-224	-116.803	-86.436
	-97.63	-284.7	-244.077	-117.86	-54.704
	-70.364	-362.33	-172.432	-123.245	-54.296
	-46.298	-331.636	-196.672	-134.732	-50.302
	-84.504	-282.762	-179.234	-168.496	-94.806
	-61.57	-276.404	-178.202	-144.13	-75.102
	-60.398	-338.87	-208.896	-204.004	-102.57
	-72.27	-348.698
