# Supplementary material for: Differential roles of NaV1.2 and NaV1.6 in neocortical pyramidal cell excitability
Source: eLife. 2025 Jul 15;14:RP105696. doi: 10.7554/eLife.105696 (PMC12263156; doi:10.7554/eLife.105696)
Supplement: Figure 4—source data 1. [file elife-105696-fig4-data1.xlsx]

## Sheet: Figure 4B
	Wildtype no drug (n=12 cells)	Wildtype + GNE-4076 (n=10 cells)	Scn8aSR/SR KI + GNE-4076 (n=11 cells)	Scn2aSR/SR KI + GNE-4076 (n=11 cells)	8a/2aSR/SR KI + GNE-4076 (n=11 cells)
	0	-3	1	-2	0
	-1	-4	1	-2	0
	0	-3	1	-1	0
	0	-2	1	-1	0
	0	-2	1	-1	-1
	0	-3	1	-1	0
	1	-2	1	-2	1
	0	-3	0	-2	1
	0	-2	1	-2	0
	0	-2	0	-2	0
	0		0	-3	-1
	0

## Sheet: Figure 4C
	Wildtype no drug (n=12 cells)	Wildtype + GNE-4076 (n=10 cells)	Scn8aSR/SR KI + GNE-4076 (n=11 cells)	Scn2aSR/SR KI + GNE-4076 (n=11 cells)	8a/2aSR/SR KI + GNE-4076 (n=11 cells)
	0.486668	-1.76	6.54333	1.46	1.27333
	0	2.73333	3.86	1.36667	-0.880001
	0.100002	4	5.27333	3.32	1.36667
	1.46	4	3.90667	2.73333	0.293331
	0.779999	2.83334	3.32	3.66	0.979999
	0.779999	6.25333	1.46667	5.42	1.36667
	0.873333	4.78667	1.36667	1.56	1.17334
	1.26667	-0.193333	0.680001	-0.486668	1.07333
	0.973332	3.90667	2.83334	2.83333	0
	1.17333	-0.786667	3.41333	3.71333	0.393333
	0.98		3.03333	3.02667	-0.293335
	-0.779999
