# Supplementary material for: Differential roles of NaV1.2 and NaV1.6 in neocortical pyramidal cell excitability
Source: eLife. 2025 Jul 15;14:RP105696. doi: 10.7554/eLife.105696 (PMC12263156; doi:10.7554/eLife.105696)
Supplement: Figure 5—source data 1. [file elife-105696-fig5-data1.xlsx]

## Sheet: Figure 5C
	D Threshold (mV)															D Peak dV/dt (V/s)															D Instantaneous Frequency (Hz)
		Wildtype, no drug control (n=12)															Wildtype, no drug control (n=12)															Wildtype, no drug control (n=12)
	Time (sec)	Cell 1	Cell 2	Cell 3	Cell 4	Cell 5	Cell 6	Cell 7	Cell 8	Cell 9	Cell 10	Cell 11	Cell 12			Time (sec)	Cell 1	Cell 2	Cell 3	Cell 4	Cell 5	Cell 6	Cell 7	Cell 8	Cell 9	Cell 10	Cell 11	Cell 12			Time (sec)	Cell 1	Cell 2	Cell 3	Cell 4	Cell 5	Cell 6	Cell 7	Cell 8	Cell 9	Cell 10	Cell 11	Cell 12
	0-1	0.787084	0.54656	0.57905	0.28432	0.25425	0.32239	0.32239	1.12375	0.17022	0.35056	0.85417	0.36083			0-1	-35.25	-36.4875	-21.2976	-15.359	-8.02723	-16.9893	-16.9893	-23.6563	-16.2236	-14	-28.5313	-14.0104			0-1	0	-1	0	-1	-1	1	1	0	-1	0	0	0
	1-2	2.0625	2.27856	1.40692	0.38905	0.53986	1.21389	1.21389	2.18	0.5381	0.87	2.11044	0.96123			1-2	-92.2798	-109.943	-62.0714	-48.3214	-27.2558	-51.875	-51.875	-65.4688	-52.0982	-46.5278	-76.0778	-47.5135			1-2	-2	-1	1	0	-2	0	0	0	-2	0	-1	1
	2-3	2.13783	2.76078	1.75892	0.42637	0.39422	1.20141	1.20141	2.205	0.41286	0.65596	2.35274	0.98358			2-3	-103.081	-126.187	-78.827	-63.6538	-41.8815	-59.8005	-59.8005	-78.4479	-65.9077	-57.3914	-94.2353	-64.9252			2-3	-1	-1	1	-1	-3	-1	-1	0	-2	-1	1	1
	3-4	1.46298	3.10929	1.98762	0.35868	0.13111	1.08626	1.08626	2.455	0.3019	0.70869	2.47125	0.91667			3-4	-108.649	-140.259	-87.9167	-72.641	-48.912	-70.0581	-70.0581	-91.2604	-72.1458	-57.1187	-106.188	-77.6563			3-4	-2	-2	0	-1	-2	-1	-1	0	-2	-1	0	0
	4-5	1.93561	3.075	2.03092	0.45325	0.14044	1.2196	1.2196	2.32022	0.34286	0.66111	2.66792	1.06292			4-5	-115.803	-145.497	-94.3048	-77.8472	-55.8704	-71.5884	-71.5884	-98.2097	-83.6458	-63.9945	-109.531	-83.1042			4-5	-1	-2	1	-2	-3	-1	-1	-1	-2	-2	0	0
	5-6	1.81822	3.11811	1.98559	0.26894	0.08889	1.21899	1.21899	2.25375	0.21231	0.59414	2.46686	0.97792			5-6	-119.125	-149.31	-97.2159	-79.9744	-59.6148	-74.8914	-74.8914	-101.292	-87.0689	-68.2096	-115.627	-90.4792			5-6	-2	-1	1	-1	-3	-1	-1	0	-3	-1	1	0
	6-7	1.77917	3.28453	2.17476	0.38881	0.03689	0.90378	0.90378	2.35133	0.26571	0.72978	2.49542	0.97125			6-7	-122.303	-155.961	-103.762	-83.3472	-68.4259	-77.1111	-77.1111	-111.054	-90.4673	-70.0945	-121.771	-97.9063			6-7	-1	-2	0	-2	-3	-2	-2	-1	-2	-2	0	0
	7-8	1.58822	3.36024	2.2527	0.47048	0.12133	1.08911	1.08911	2.15622	0.25422	0.31911	2.73118	1.17338			7-8	-123.077	-157.723	-103.727	-88.4231	-71.5259	-80.5444	-80.5444	-113.499	-97.1681	-72.7945	-125.98	-101.651			7-8	-2	-2	1	-1	-3	-2	-2	-1	-1	-2	1	1
	8-9	1.62939	3.03405	2.02191	0.38937	-0.21822	1.04202	1.04202	2.2175	0.37048	0.73535	2.9225	1.29594			8-9	-129.281	-160.83	-110.929	-91.5278	-72.3259	-80.2247	-80.2247	-116.104	-103.372	-71.9975	-130.438	-107.974			8-9	-1	-2	0	-2	-3	-1	-1	0	-2	-1	0	-1
	9-10	1.91712	3.25167	2.12048	0.86227	0.18016	1.17852	1.17852	2.51872	0.34952	0.81926	2.84733	1.05274			9-10	-129.151	-161.035	-113.202	-103.667	-77.2989	-84.5093	-84.5093	-120.905	-106.134	-79.4167	-133.222	-110.408			9-10	-1.55556	-2.66667	1.55556	0.44444	-2.44444	-2	-2	-1.55556	-0.44444	-2	0.66667	-0.44444
		Wildtype + GNE-4076 (n=12)															Wildtype + GNE-4076 (n=12)															Wildtype + GNE-4076 (n=12)
	Time (sec)	Cell 1	Cell 2	Cell 3	Cell 4	Cell 5	Cell 6	Cell 7	Cell 8	Cell 9	Cell 10	Cell 11	Cell 12			Time (sec)	Cell 1	Cell 2	Cell 3	Cell 4	Cell 5	Cell 6	Cell 7	Cell 8	Cell 9	Cell 10	Cell 11	Cell 12			Time (sec)	Cell 1	Cell 2	Cell 3	Cell 4	Cell 5	Cell 6	Cell 7	Cell 8	Cell 9	Cell 10	Cell 11	Cell 12
	0-1	0.61	0.21148	0.38311	0.08167	0.46978	0.69762	0.67667	0.72291	0.21467	0.46564	0.17631	0.65114			0-1	-30.5313	-18.1667	-15.1278	-12.8333	-15.6741	-27.2143	-27.5944	-42.1154	-18.8333	-33.8462	-12.5536	-17.0934			0-1	0	0	-2	0	-3	0	-2	1	-2	1	-2	-1
	1-2	1.55583	0.73431	1.53783	0.48394	1.65795	1.92996	2.258	2.05889	0.99815	2.00278	0.6125	1.86635			1-2	-84.4792	-53.0613	-46.7354	-41.0758	-64.3348	-81.174	-99.8778	-123.264	-59.8333	-98.9028	-44.8371	-69.5496			1-2	0	-2	-4	-1	-5	-1	-2	0	-3	0	-5	-2
	2-3	1.5685	1.07477	1.75825	0.418	1.89455	2.52572	2.77533	2.45778	1.09519	2.38974	1.1025	2.49584			2-3	-100.425	-70.8475	-72.2042	-56.8333	-86.0387	-103.381	-135.494	-149.333	-74.5	-125.718	-70.5972	-91.6493			2-3	-1	-1	-4	-2	-7	0	-2	1	-3	1	-4	-3
	3-4	1.85472	1.11689	2.15311	0.97267	2.34	2.26689	3.138	2.995	1.14926	2.85778	1.35917	2.80135			3-4	-109.203	-84.0593	-90.7278	-71.4667	-105.296	-111.405	-156.011	-179.431	-83.463	-146.722	-82.1099	-106.98			3-4	-1	-3	-5	-2	-6	-1	-2	0	-3	0	-5	-2
	4-5	1.95917	1.24044	2.62057	1.16867	2.70667	2.29048	3.71467	3.6747	1.37667	3.32889	1.46083	2.8299			4-5	-116.014	-100.337	-107.707	-80.5167	-122.185	-119.469	-173.578	-199.872	-89.9815	-161.347	-97.4444	-122.752			4-5	-1	-3	-6	-2	-6	-1	-2	1	-3	0	-4	-4
	5-6	2.15488	1.71764	2.69444	1.12	2.94067	2.28278	4.03	3.85667	1.45296	3.57333	1.74038	3.26736			5-6	-124.446	-112.561	-113.206	-91.7333	-134.98	-126.623	-186.5	-214.861	-99.963	-178.653	-110.504	-130.483			5-6	-2	-2	-5	-2	-8	-1	-3	0	-3	0	-5	-3
	6-7	2.21107	1.79422	3.18149	1.52	3.71333	2.64524	4.54037	4.32222	1.525	3.75636	1.66947	3.66924			6-7	-133.304	-120.481	-126.222	-101	-149.493	-135.655	-199.241	-233.778	-106.542	-192.455	-120.519	-142.086			6-7	-2	-3	-7	-2	-7	0	-3	0	-4	-1	-5	-4
	7-8	2.2806	2.1827	3.65962	1.70733	3.60467	2.43971	4.63741	4.6596	1.75667	4.36909	1.95371	3.55057			7-8	-137.565	-134.807	-139.29	-109.783	-159.43	-137.341	-210.648	-248.121	-111.771	-203.97	-126.943	-150.369			7-8	-2	-4	-6	-2	-8	-1	-3	-1	-4	-1	-5	-4
	8-9	2.27345	2.23067	4.01482	1.58481	3.92593	2.8915	5.2575	5.07778	2.00083	4.5903	2.32583	4.41079			8-9	-145.911	-139.726	-147.645	-118.204	-171.981	-148.212	-223.111	-266.708	-118.438	-219.742	-137.58	-161.36			8-9	-2	-3	-7	-3	-9	-1	-4	0	-4	-1	-5	-5
	9-10	2.35814	2.37127	4.40382	2.165	3.9163	2.67381	5.37917	5.70911	1.89	4.98	2.33983	4.50783			9-10	-149.625	-149.593	-153.502	-124.687	-176.852	-151.446	-233.465	-275.333	-126.417	-227	-144.775	-166.23			9-10	-1.55556	-2.44444	-7.77778	-3.11111	-8	-0.66667	-3.11111	-0.88889	-3.11111	-0.88889	-4.88889	-4
		8a/2aSR/SR KI + GNE-4076 (n=12)															8a/2aSR/SR KI + GNE-4076 (n=12)															8a/2aSR/SR KI + GNE-4076 (n=12)
	Time (sec)	Cell 1	Cell 2	Cell 3	Cell 4	Cell 5	Cell 6	Cell 7	Cell 8	Cell 9	Cell 10	Cell 11	Cell 12			Time (sec)	Cell 1	Cell 2	Cell 3	Cell 4	Cell 5	Cell 6	Cell 7	Cell 8	Cell 9	Cell 10	Cell 11	Cell 12			Time (sec)	Cell 1	Cell 2	Cell 3	Cell 4	Cell 5	Cell 6	Cell 7	Cell 8	Cell 9	Cell 10	Cell 11	Cell 12
	0-1	0.605142	0.2581	0.44933	0.55657	0.53042	0.29556	0.39546	0.82872	0.64667	0.56167	0.45286	0.42389			0-1	-26.2619	-13.7976	-23.6833	-15.6793	-38.125	-23.2593	-22.6429	-27.2033	-28.5	-28.7083	-27.0238	-17.9306			0-1	1	0	0	-1	0	-1	-1	-1	0	0	0	0
	1-2	1.32524	0.56952	1.172	1.00889	1.13393	1.17407	1.11794	2.26	1.58517	1.59342	1.28513	0.88788			1-2	-69.5952	-34.9011	-71	-42.5463	-97.4554	-79.6296	-73.6429	-83.1627	-76.3264	-87.9915	-72.6557	-51.4646			1-2	0	-1	0	-3	-2	-1	-2	-2	-1	1	-1	-1
	2-3	1.63971	0.57452	0.82067	0.58844	1.51679	1.182	1.08329	2.18611	1.53361	1.58667	1.3719	1.03667			2-3	-83.3388	-38.869	-80.05	-54.7611	-110.717	-89.8667	-82.8701	-98.8294	-89.0375	-103.194	-84.881	-56.0889			2-3	-1	-2	0	-2	-2	0	-3	-2	-1	0	0	-2
	3-4	1.57095	0.6973	1.144	0.68296	1.29717	0.87037	1.24016	2.59389	1.62383	1.69906	1.06051	0.64061			3-4	-93.1548	-47.1607	-90.5333	-53.9537	-118.457	-101.611	-92.9623	-110.802	-97.1597	-105.107	-92.1557	-66.1313			3-4	0	-2	0	-3	-1	-1	-2	-2	-1	1	-1	-1
	4-5	1.39919	0.29922	0.76982	0.71704	0.86739	0.74	1.10996	2.41333	1.48695	1.87333	1.23381	0.782			4-5	-102.159	-50.7403	-91.9697	-61.5833	-127.968	-101.574	-99.5368	-121.28	-97.7931	-114.5	-99.8809	-65.8555			4-5	-1	-3	1	-3	-1	-1	-3	-1	-1	0	0	-2
	5-6	1.36227	0.42897	0.94733	0.79378	1.19939	0.74148	1.37071	2.43111	1.35095	1.73445	1.00429	0.71212			5-6	-109.429	-57.9663	-97.6167	-61.5945	-132.79	-107.019	-108.851	-123.815	-104.838	-119.222	-102.679	-72.9646			5-6	-1	-2	0	-2	-1	-1	-2	-2	-1	0	0	-1
	6-7	1.0915	0.5673	0.77133	0.69481	1.02383	0.55667	1.13349	2.4959	1.46117	1.85445	0.87762	0.73267			6-7	-117.711	-59.744	-100.317	-66.4537	-136.69	-112.283	-109.879	-127.87	-109.526	-119.389	-107.905	-70.2389			6-7	-1	-2	0	-3	-1	0	-2	-1	-1	0	0	-2
	7-8	1.42945	0.35134	0.67467	0.53111	0.91726	0.5237	1.48405	2.6241	1.50028	1.51333	0.96095	0.71467			7-8	-119.403	-60.4978	-99.3167	-65.8796	-141.253	-114.111	-118.393	-134.665	-117.038	-121.903	-109.488	-75.3555			7-8	-1	-3	0	-3	-2	-1	-2	-1	-1	0	0	-2
	8-9	1.44432	0.31563	0.788	0.71704	1.1145	0.80546	1.21723	2.52615	1.54028	1.64444	0.9681	0.66533			8-9	-124.134	-67.7024	-104.409	-65.1204	-140.446	-122.591	-116.158	-139.473	-118.16	-126.125	-113.857	-75.1222			8-9	-1	-2	1	-3	-1	1	-3	-1	-1	0	0	-2
	9-10	1.53108	0.49377	0.67541	0.5637	1.13298	0.74148	1.02087	2.62909	1.43631	1.76535	0.77436	0.78222			9-10	-127.474	-64.9675	-103.259	-69.9722	-143.705	-120.333	-119.249	-142.16	-121.045	-125.919	-116.04	-78.2963			9-10	-1.77778	-1.77778	0	-2	-0.44444	0	-1.77778	-1.77778	-0.44444	0.22222	0.44444	-2

## Sheet: Figure 5D
	D Threshold (mV)				D Peak dV/dt (V/s)				D Instantaneous Frequency (Hz)
	Wildtype no drug (n=12 cells)	Wildtype + GNE-4076 (n=12 cells)	8a/2aSR/SR KI + GNE-4076 (n=12 cells)		Wildtype no drug (n=12 cells)	Wildtype + GNE-4076 (n=12 cells)	8a/2aSR/SR KI + GNE-4076 (n=12 cells)		Wildtype no drug (n=12 cells)	Wildtype + GNE-4076 (n=12 cells)	8a/2aSR/SR KI + GNE-4076 (n=12 cells)
	0.486668	-1.76	1.53108		-129.151	-149.625	-127.474		-1.55556	-1.55556	-1.77778
	3.25167	2.37127	0.49377		-161.035	-149.593	-64.9675		-2.66667	-2.44444	-1.77778
	2.12048	4.40382	0.67541		-113.202	-153.502	-103.259		1.55556	-7.77778	0
	0.86227	2.165	0.5637		-103.667	-124.687	-69.9722		0.44444	-3.11111	-2
	0.18016	3.9163	1.13298		-77.2989	-176.852	-143.705		-2.44444	-8	-0.44444
	1.17852	2.67381	0.74148		-84.5093	-151.446	-120.333		-2	-0.66667	0
	1.17852	5.37917	1.02087		-84.5093	-233.465	-119.249		-2	-3.11111	-1.77778
	2.51872	5.70911	2.62909		-120.905	-275.333	-142.16		-1.55556	-0.88889	-1.77778
	0.34952	1.89	1.43631		-106.134	-126.417	-121.045		-0.44444	-3.11111	-0.44444
	0.81926	4.98	1.76535		-79.4167	-227	-125.919		-2	-0.88889	0.22222
	2.84733	2.33983	0.77436		-133.222	-144.775	-116.04		0.66667	-4.88889	0.44444
	1.05274	4.50783	0.78222		-110.408	-166.23	-78.2963		-0.44444	-4	-2
