# Supplementary material for: Differential roles of NaV1.2 and NaV1.6 in neocortical pyramidal cell excitability
Source: eLife. 2025 Jul 15;14:RP105696. doi: 10.7554/eLife.105696 (PMC12263156; doi:10.7554/eLife.105696)
Supplement: Figure 6—figure supplement 1—source data 1. [file elife-105696-fig6-figsupp1-data1.xlsx]

## Sheet: Figure 5 & 6-S1A
	D Threshold (mV)															D Peak dV/dt (V/s)															D Instantaneous Frequency (Hz)
		Wildtype, no drug control (n=12)															Wildtype, no drug control (n=12)															Wildtype, no drug control (n=12)
	Time (sec)	Cell 1	Cell 2	Cell 3	Cell 4	Cell 5	Cell 6	Cell 7	Cell 8	Cell 9	Cell 10	Cell 11	Cell 12			Time (sec)	Cell 1	Cell 2	Cell 3	Cell 4	Cell 5	Cell 6	Cell 7	Cell 8	Cell 9	Cell 10	Cell 11	Cell 12			Time (sec)	Cell 1	Cell 2	Cell 3	Cell 4	Cell 5	Cell 6	Cell 7	Cell 8	Cell 9	Cell 10	Cell 11	Cell 12
	0-1	-39.6054	-40.4818	-41.2314	-40.0462	-41.1302	-41.3621	-41.3621	-40.1862	-41.2231	-41.8539	-37.9758	-38.2267			0-1	483.208	429.533	450.274	485.474	451.51	450.538	450.538	407.865	526.089	531.194	377.635	479.719			0-1	16	15	14	13	17	13	13	16	15	12	16	16
	1-2	-38.33	-38.7498	-40.4036	-39.9414	-40.8446	-40.4706	-40.4706	-39.13	-40.8552	-41.3344	-36.7196	-37.6263			1-2	426.179	356.078	409.5	452.512	432.281	415.653	415.653	366.052	490.214	498.667	330.089	446.216			1-2	14	15	15	14	16	12	12	16	14	12	15	17
	2-3	-38.2547	-38.2676	-40.0516	-39.9041	-40.9902	-40.483	-40.483	-39.105	-40.9805	-41.5485	-36.4773	-37.6039			2-3	415.378	339.833	392.744	437.179	417.656	407.727	407.727	353.073	476.405	487.803	311.931	428.804			2-3	15	15	15	13	15	11	11	16	14	11	17	17
	3-4	-38.9295	-37.919	-39.8229	-39.9718	-41.2533	-40.5982	-40.5982	-38.855	-41.0914	-41.4958	-36.3588	-37.6708			3-4	409.81	325.762	383.655	428.192	410.625	397.47	397.47	340.26	470.167	488.076	299.979	416.073			3-4	14	14	14	13	16	11	11	16	14	11	16	16
	4-5	-38.4569	-37.9533	-39.7796	-39.8772	-41.244	-40.4648	-40.4648	-38.9898	-41.0505	-41.5433	-36.1621	-37.5246			4-5	402.656	320.524	377.267	422.986	403.667	395.939	395.939	333.311	458.667	481.2	296.635	410.625			4-5	15	14	15	12	15	11	11	15	14	10	16	16
	5-6	-38.5743	-37.9102	-39.8249	-40.0615	-41.2956	-40.4655	-40.4655	-39.0562	-41.181	-41.6103	-36.3631	-37.6096			5-6	399.333	316.711	374.356	420.859	399.922	392.636	392.636	330.229	455.244	476.985	290.539	403.25			5-6	14	15	15	13	15	11	11	16	13	11	17	16
	6-7	-38.6133	-37.7438	-39.6357	-39.9417	-41.3476	-40.7807	-40.7807	-38.9587	-41.1276	-41.4747	-36.3346	-37.6163			6-7	396.156	310.06	367.81	417.486	391.111	390.417	390.417	320.467	451.845	475.1	284.396	395.823			6-7	15	14	14	12	15	10	10	15	14	10	16	16
	7-8	-38.8043	-37.6681	-39.5578	-39.86	-41.2631	-40.5953	-40.5953	-39.1538	-41.1391	-41.8853	-36.0988	-37.4141			7-8	395.381	308.298	367.844	412.41	388.011	386.983	386.983	318.022	445.144	472.4	280.186	392.078			7-8	14	14	15	13	15	10	10	15	15	10	17	17
	8-9	-38.7631	-37.9943	-39.7886	-39.9411	-41.6027	-40.6424	-40.6424	-39.0925	-41.0229	-41.4691	-35.9075	-37.2916			8-9	389.178	305.19	360.643	409.306	387.211	387.303	387.303	315.417	438.94	473.197	275.729	385.756			8-9	15	14	14	12	15	11	11	16	14	11	16	15
	9-10	-38.4754	-37.7767	-39.69	-39.4682	-41.2043	-40.5059	-40.5059	-38.7913	-41.0438	-41.3852	-35.9827	-37.5348			9-10	389.308	304.986	358.369	397.167	382.238	383.019	383.019	310.615	436.179	465.778	272.944	383.321			9-10	14.4444	13.3333	15.5556	14.4444	15.5556	10	10	14.4444	15.5556	10	16.6667	15.5556
		Wildtype + GNE-4076 (n=12)															Wildtype + GNE-4076 (n=12)															Wildtype + GNE-4076 (n=12)
	Time (sec)	Cell 1	Cell 2	Cell 3	Cell 4	Cell 5	Cell 6	Cell 7	Cell 8	Cell 9	Cell 10	Cell 11	Cell 12			Time (sec)	Cell 1	Cell 2	Cell 3	Cell 4	Cell 5	Cell 6	Cell 7	Cell 8	Cell 9	Cell 10	Cell 11	Cell 12			Time (sec)	Cell 1	Cell 2	Cell 3	Cell 4	Cell 5	Cell 6	Cell 7	Cell 8	Cell 9	Cell 10	Cell 11	Cell 12
	0-1	-42.4558	-40.9774	-41.4322	-37.5817	-37.3436	-42.5929	-36.5133	-38.9415	-39.3353	-37.3277	-38.3362	-39.0241			0-1	428.76	480.926	404.056	422.167	411.289	460.357	471.683	510.051	507.333	449.987	468.405	434.526			0-1	16	18	18	12	15	14	10	13	10	13	14	13
	1-2	-41.51	-40.4546	-40.2775	-37.1794	-36.1554	-41.3605	-34.932	-37.6056	-38.5519	-35.7906	-37.9	-37.8089			1-2	374.813	446.031	372.448	393.924	362.628	406.397	399.4	428.903	466.333	384.931	436.121	382.069			1-2	16	16	16	11	13	13	10	12	9	12	11	12
	2-3	-41.4973	-40.1141	-40.0571	-37.2453	-35.9188	-40.7648	-34.4147	-37.2067	-38.4548	-35.4036	-37.41	-37.1794			2-3	358.867	428.245	346.979	378.167	340.924	384.19	363.783	402.833	451.667	358.115	410.361	359.97			2-3	15	17	16	10	11	14	10	13	9	13	12	11
	3-4	-41.2111	-40.072	-39.6622	-36.6907	-35.4733	-41.0236	-34.052	-36.6694	-38.4007	-34.9356	-37.1533	-36.8739			3-4	350.089	415.033	328.456	363.533	321.667	376.167	343.267	372.736	442.704	337.111	398.848	344.639			3-4	15	15	15	10	12	13	10	12	9	12	11	12
	4-5	-41.1067	-39.9484	-39.1948	-36.4947	-35.1067	-41	-33.4753	-35.9897	-38.1733	-34.4644	-37.0517	-36.8453			4-5	343.278	398.756	311.476	354.483	304.778	368.103	325.7	352.295	436.185	322.486	383.514	328.867			4-5	15	15	14	10	12	13	10	13	9	12	12	10
	5-6	-40.911	-39.4712	-39.1209	-36.5433	-34.8727	-41.0077	-33.16	-35.8078	-38.097	-34.22	-36.7721	-36.4079			5-6	334.845	386.531	305.978	343.267	291.983	360.949	312.778	337.306	426.204	305.181	370.455	321.136			5-6	14	16	15	10	10	13	9	12	9	12	11	11
	6-7	-40.8548	-39.3947	-38.6338	-36.1433	-34.1	-40.6452	-32.6496	-35.3422	-38.025	-34.037	-36.843	-36.006			6-7	325.988	378.611	292.962	334	277.47	351.917	300.037	318.389	419.625	291.379	360.439	309.533			6-7	14	15	13	10	11	14	9	12	8	11	11	10
	7-8	-40.7852	-39.0062	-38.1557	-35.956	-34.2087	-40.8508	-32.5526	-35.0048	-37.7933	-33.4242	-36.5588	-36.1247			7-8	321.726	364.286	279.893	325.217	267.533	350.231	288.63	304.045	414.396	279.864	354.015	301.25			7-8	14	14	14	10	10	13	9	11	8	11	11	10
	8-9	-40.7924	-38.9582	-37.8005	-36.0785	-33.8874	-40.399	-31.9325	-34.5867	-37.5492	-33.203	-36.1867	-35.2644			8-9	313.381	359.367	271.538	316.796	254.981	339.359	276.167	285.458	407.729	264.091	343.379	290.259			8-9	14	15	13	9	9	13	8	12	8	11	11	9
	9-10	-40.7077	-38.8176	-37.4115	-35.4983	-33.897	-40.6167	-31.8108	-33.9553	-37.66	-32.8133	-36.1727	-35.1674			9-10	309.667	349.5	265.682	310.313	250.111	336.125	265.812	276.833	399.75	256.833	336.183	285.389			9-10	14.4444	15.5556	12.2222	8.88889	10	13.3333	8.88889	11.1111	8.88889	11.1111	11.1111	10
		8a/2aSR/SR KI + GNE-4076 (n=12)															8a/2aSR/SR KI + GNE-4076 (n=12)															8a/2aSR/SR KI + GNE-4076 (n=12)
	Time (sec)	Cell 1	Cell 2	Cell 3	Cell 4	Cell 5	Cell 6	Cell 7	Cell 8	Cell 9	Cell 10	Cell 11	Cell 12			Time (sec)	Cell 1	Cell 2	Cell 3	Cell 4	Cell 5	Cell 6	Cell 7	Cell 8	Cell 9	Cell 10	Cell 11	Cell 12			Time (sec)	Cell 1	Cell 2	Cell 3	Cell 4	Cell 5	Cell 6	Cell 7	Cell 8	Cell 9	Cell 10	Cell 11	Cell 12
	0-1	-41.1787	-38.8181	-42.012	-41.1745	-41.9254	-43.0444	-41.9169	-41.5113	-40.2225	-42.0328	-44.1471	-43.2294			0-1	528.667	413.821	467.983	468.515	503.854	497.741	511	444.321	432.604	483.181	432.286	497.625			0-1	15	14	10	11	16	9	13	13	16	12	14	12
	1-2	-40.4586	-38.5067	-41.2893	-40.7222	-41.3219	-42.1659	-41.1944	-40.08	-39.284	-41.001	-43.3149	-42.7655			1-2	485.333	392.718	420.667	441.648	444.524	441.37	460	388.361	384.778	423.897	386.654	464.091			1-2	14	13	10	9	14	9	12	12	15	13	13	11
	2-3	-40.1441	-38.5017	-41.6407	-41.1427	-40.939	-42.158	-41.2291	-40.1539	-39.3356	-41.0078	-43.2281	-42.6167			2-3	471.59	388.75	411.617	429.433	431.262	431.133	450.773	372.694	372.067	408.694	374.429	459.467			2-3	13	12	10	10	14	10	11	12	15	12	14	10
	3-4	-40.2129	-38.3789	-41.3173	-41.0481	-41.1587	-42.4696	-41.0722	-39.7461	-39.2453	-40.8954	-43.5395	-43.0127			3-4	461.774	380.458	401.133	430.241	423.522	419.389	440.681	360.722	363.944	406.782	367.154	449.424			3-4	14	12	10	9	15	9	12	12	15	13	13	11
	4-5	-40.3846	-38.777	-41.6915	-41.0141	-41.5884	-42.6	-41.2024	-39.9267	-39.3822	-40.7211	-43.3662	-42.8713			4-5	452.769	376.879	399.697	422.611	414.011	419.426	434.106	350.244	363.311	397.389	359.429	449.7			4-5	13	11	11	9	15	9	11	13	15	12	14	10
	5-6	-40.4215	-38.6472	-41.514	-40.9373	-41.2564	-42.5985	-40.9417	-39.9089	-39.5182	-40.86	-43.5957	-42.9412			5-6	445.5	369.653	394.05	422.6	409.189	413.981	424.792	347.708	356.267	392.667	356.631	442.591			5-6	13	12	10	10	15	9	12	12	15	12	14	11
	6-7	-40.6923	-38.5089	-41.69	-41.0363	-41.432	-42.7833	-41.1789	-39.8441	-39.408	-40.74	-43.7224	-42.9207			6-7	437.218	367.875	391.35	417.741	405.289	408.717	423.764	343.654	351.578	392.5	351.405	445.317			6-7	13	12	10	9	15	10	12	13	15	12	14	10
	7-8	-40.3544	-38.7248	-41.7867	-41.2	-41.5386	-42.8163	-40.8283	-39.7159	-39.3689	-41.0811	-43.639	-42.9387			7-8	435.526	367.121	392.35	418.315	400.726	406.889	415.25	336.859	344.067	389.986	349.821	440.2			7-8	13	11	10	9	14	9	12	13	15	12	14	10
	8-9	-40.3395	-38.7606	-41.6733	-41.0141	-41.3413	-42.5345	-41.0952	-39.8138	-39.3289	-40.95	-43.6319	-42.988			8-9	430.795	359.917	387.258	419.074	401.533	398.409	417.485	332.051	342.944	385.764	345.452	440.433			8-9	13	12	11	9	15	11	11	13	15	12	14	10
	9-10	-40.2527	-38.5824	-41.7859	-41.1674	-41.3229	-42.5985	-41.2915	-39.7109	-39.4329	-40.8291	-43.8256	-42.8711			9-10	427.455	362.652	388.407	414.222	398.274	400.667	414.394	329.364	340.06	385.97	343.269	437.259			9-10	12.2222	12.2222	10	10	15.5556	10	12.2222	12.2222	15.5556	12.2222	14.4444	10
		Scn2aSR/SR KI + GNE-4076 (n=12)															Scn2aSR/SR KI + GNE-4076 (n=12)															Scn2aSR/SR KI + GNE-4076 (n=12)
	Time (sec)	Cell 1	Cell 2	Cell 3	Cell 4	Cell 5	Cell 6	Cell 7	Cell 8	Cell 9	Cell 10	Cell 11	Cell 12			Time (sec)	Cell 1	Cell 2	Cell 3	Cell 4	Cell 5	Cell 6	Cell 7	Cell 8	Cell 9	Cell 10	Cell 11	Cell 12			Time (sec)	Cell 1	Cell 2	Cell 3	Cell 4	Cell 5	Cell 6	Cell 7	Cell 8	Cell 9	Cell 10	Cell 11	Cell 12
	0-1	-37.3609	-35.5193	-36.8078	-38.1687	-37.7031	-38.6267	-37.2387	-36.7773	-37.8253	-38.4143	-37.0058	-36.9005			0-1	382.384	399.102	413.528	438.513	464.218	475.59	440.178	496.127	409.689	409.714	411.389	496.036			0-1	23	18	12	13	13	13	15	17	15	14	15	14
	1-2	-35.342	-33.989	-35.3028	-36.7511	-36.8697	-37.6776	-35.8329	-35.9129	-36.14	-36.5567	-35.0359	-35.9783			1-2	326.792	347.245	355.639	396.944	431.179	431.47	377.905	435.792	358.024	340.597	336.359	441.681			1-2	20	17	12	12	13	11	14	16	14	12	13	12
	2-3	-34.667	-33.9533	-34.6278	-36.5483	-37.0538	-37.5078	-35.6573	-35.6083	-35.86	-36.3767	-34.4579	-35.7344			2-3	310.408	326.698	333.486	379.444	416.988	418.083	361.656	417.188	339.012	322.292	315.487	423.487			2-3	20	16	12	12	14	12	15	16	14	12	13	13
	3-4	-34.4726	-33.5347	-34.4406	-36.45	-36.6287	-37.2685	-35.2938	-35.4289	-35.4419	-36.0767	-34.3677	-35.3267			3-4	295.667	311.033	321.639	369.514	404.91	406.818	347.167	411.633	326.798	314.944	301.244	414.222			3-4	19	15	12	12	13	11	15	15	14	12	13	12
	4-5	-34.5032	-33.4195	-34.0733	-36.3012	-36.5159	-37.2242	-34.9609	-35.5342	-35.3938	-36.0267	-34.4072	-35.5621			4-5	287.465	298.75	312.903	355.606	397.564	399.061	338.378	402.656	317.381	304.972	298.25	403.962			4-5	19	14	12	11	13	11	15	16	14	12	12	13
	5-6	-34.0775	-33.32	-34.1442	-36.035	-36.2938	-37.0739	-35.0836	-35.0649	-35.3095	-36.0261	-34.2323	-35.2039			5-6	281.421	291.489	309.394	352.375	389.583	392.848	327.967	395.356	306.917	301.409	289.218	400.764			5-6	19	15	11	12	14	11	15	15	14	11	13	12
	6-7	-34.0867	-32.7786	-34.2509	-36.074	-35.7492	-36.9913	-34.7938	-35.2333	-34.7964	-35.7067	-33.9194	-35.14			6-7	275.114	278.833	304.545	346.417	378.615	386.983	321.929	391.289	301.41	291	284.222	391.681			6-7	19	14	11	10	13	10	14	15	13	11	12	12
	7-8	-33.5316	-32.6386	-33.7182	-35.9558	-35.8078	-36.6013	-34.5914	-35.1169	-34.891	-36.0527	-33.9224	-35.0051			7-8	266.763	272.06	299.879	341.803	375.736	386	316.19	386.367	294.702	290.985	279	385.756			7-8	19	14	11	11	12	10	14	15	14	11	11	13
	8-9	-33.4522	-32.6846	-33.8145	-35.4933	-35.6433	-36.592	-34.2229	-34.8325	-34.591	-35.7152	-33.9621	-35.3522			8-9	262.019	272.513	297	337.152	373.319	383.067	309.869	381	288.583	287.864	275.321	384.931			8-9	18	13	11	11	12	10	14	16	14	11	13	12
	9-10	-33.4479	-32.3333	-33.72	-35.5073	-35.4927	-36.6422	-33.9856	-35.1482	-33.9517	-35.2644	-33.6655	-34.9339			9-10	259.406	265.708	293.217	333.767	371.318	376	304.764	375.782	281.972	285.074	272.773	381.773			9-10	17.7778	13.3333	11.1111	11.1111	12.2222	10	13.3333	14.4444	13.3333	10	12.2222	12.2222
		Scn8aSR/SR KI + GNE-4076 (n=11)															Scn8aSR/SR KI + GNE-4076 (n=11)															Scn8aSR/SR KI + GNE-4076 (n=11)
	Time (sec)	Cell 1	Cell 2	Cell 3	Cell 4	Cell 5	Cell 6	Cell 7	Cell 8	Cell 9	Cell 10	Cell 11				Time (sec)	Cell 1	Cell 2	Cell 3	Cell 4	Cell 5	Cell 6	Cell 7	Cell 8	Cell 9	Cell 10	Cell 11				Time (sec)	Cell 1	Cell 2	Cell 3	Cell 4	Cell 5	Cell 6	Cell 7	Cell 8	Cell 9	Cell 10	Cell 11
	0-1	-40.8128	-42.3661	-41.0289	-40.5848	-38.4841	-40.5494	-40.6611	-38.55	-43.3373	-41.0284	-41.839				0-1	383.295	485.803	425.956	488.488	444.333	441.608	446.114	389.952	489.578	443.511	429.5				0-1	13	11	15	14	13		17	19	14	17	15	14
	1-2	-38.9431	-42.1644	-40.404	-39.0113	-37.3394	-39.6921	-39.7042	-37.6733	-42.4748	-40.2042	-40.8754				1-2	329.436	468.463	373.544	433.244	401.727	395.375	388.948	347.449	448.389	373.396	372.625				1-2	13	9	15	13	11		16	16	13	18	16	16
	2-3	-38.6344	-42.5	-40.3956	-38.8677	-37.1583	-39.668	-39.4188	-37.5078	-42.4907	-40.0629	-40.8596				2-3	304.051	453.333	360.856	406.013	388.639	370.611	367.049	322.653	436.333	351.729	352.389				2-3	13	10	15	13	12		15	17	12	18	16	15
	3-4	-38.265	-42.2296	-39.949	-38.5446	-36.9789	-39.0813	-39.522	-37.3752	-42.4741	-39.8957	-41.256				3-4	284.639	441.926	345.619	385.756	383.097	354.978	344.118	304.788	425.118	331.745	339.033				3-4	12	9	14	13	12		15	17	11	17	17	15
	4-5	-38.1517	-42.5687	-39.9684	-38.2733	-37.26	-39.4738	-39.6246	-37.3388	-42.3826	-39.8562	-41.0022				4-5	270	430.917	333.689	366.192	373.545	344.267	328.833	291.409	415.454	317.865	327.111				4-5	12	10	15	13	11		15	16	11	18	16	15
	5-6	-38.2483	-42.5993	-39.9281	-38.4241	-37.0733	-39.46	-39.2631	-37.1494	-42.59	-39.74	-40.9243				5-6	254.306	424.241	323.869	353.282	370.879	329.611	313.078	275.681	410.615	302.569	320.024				5-6	12	9	14	13	11		15	17	12	16	17	14
	6-7	-37.8494	-42.676	-39.8836	-38.175	-37.0285	-39.7071	-39.2631	-36.8879	-42.7043	-39.7213	-40.7031				6-7	241.694	415.283	319.7	337.931	367.303	321.633	300.569	265.197	408.706	295.406	309.256				6-7	12	10	15	12	11		15	17	11	17	16	15
	7-8	-37.8212	-42.5659	-40.0538	-37.9503	-37.1085	-39.4605	-39.1886	-36.6127	-42.6294	-39.5325	-40.5				7-8	228.818	408.778	311.286	325.628	363.97	310.226	287.5	253.924	404	285.802	300.631				7-8	11	9	14	13	11		14	17	11	17	16	14
	8-9	-37.8344	-42.666	-39.83	-37.8911	-37.2073	-39.4662	-39.1846	-36.8067	-42.4689	-39.5137	-40.9124				8-9	219.972	405.5	308.131	317.181	364.182	301.289	277.698	244.617	397.269	276.615	292.322				8-9	12	10	14	12	11		15	16	10	18	16	15
	9-10	-38.0152	-42.3567	-39.9195	-37.92	-37.3156	-39.3923	-39.1112	-36.5733	-42.4804	-39.6231	-40.6246				9-10	209.712	396.979	300.103	310.05	365.111	295.449	267.021	232.9	394.844	270.489	288.269				9-10	12.2222	8.88889	14.4444	11.1111	10		14.4444	17.7778	11.1111	16.6667	16.6667	14.4444
