# Supplementary material for: Differential roles of NaV1.2 and NaV1.6 in neocortical pyramidal cell excitability
Source: eLife. 2025 Jul 15;14:RP105696. doi: 10.7554/eLife.105696 (PMC12263156; doi:10.7554/eLife.105696)
Supplement: Figure 6—source data 1. [file elife-105696-fig6-data1.xlsx]

## Sheet: Figure 6C
	D Threshold (mV)															D Peak dV/dt (V/s)															D Instantaneous Frequency (Hz)
		Scn2aSR/SR KI + GNE-4076 (n=12)															Scn2aSR/SR KI + GNE-4076 (n=12)															Scn2aSR/SR KI + GNE-4076 (n=12)
	Time (sec)	Cell 1	Cell 2	Cell 3	Cell 4	Cell 5	Cell 6	Cell 7	Cell 8	Cell 9	Cell 10	Cell 11	Cell 12			Time (sec)	Cell 1	Cell 2	Cell 3	Cell 4	Cell 5	Cell 6	Cell 7	Cell 8	Cell 9	Cell 10	Cell 11	Cell 12			Time (sec)	Cell 1	Cell 2	Cell 3	Cell 4	Cell 5	Cell 6	Cell 7	Cell 8	Cell 9	Cell 10	Cell 11	Cell 12
	0-1	1.03469	0.62444	0.57778	0.61509	0.57788	0.50476	0.69967	0.51756	1.11467	0.85655	1.10506	0.50238			0-1	-28.2132	-21.2315	-27	-16.2729	-14.9725	-19.815	-25.9681	-31.6318	-24.3319	-35.0565	-38.3194	-28.6786			0-1	-1	0	0	-1	-1	-1	-1	-1	-1	-2	-1	0
	1-2	3.05356	2.15468	2.08278	2.0327	1.41121	1.45385	2.10548	1.3819	2.8	2.71417	3.07494	1.42452			1-2	-83.8056	-73.0882	-84.8889	-57.8413	-48.011	-63.9351	-88.2411	-91.9676	-75.997	-104.174	-113.349	-83.0337			1-2	-4	-1	0	-2	-1	-3	-2	-2	-2	-4	-3	-2
	2-3	3.72856	2.19037	2.75778	2.23548	1.22714	1.62365	2.281	1.68648	3.08	2.89417	3.65288	1.6685			2-3	-100.189	-93.6354	-107.042	-75.3413	-62.2024	-77.3214	-104.49	-110.572	-95.0089	-122.479	-134.221	-101.227			2-3	-4	-2	0	-2	0	-2	-1	-2	-2	-4	-3	-1
	3-4	3.92292	2.60904	2.945	2.33381	1.65223	1.86294	2.64456	1.86593	3.4981	3.19417	3.74314	2.07619			3-4	-114.931	-109.3	-118.889	-85.2718	-74.2802	-88.5866	-118.979	-116.126	-107.223	-129.826	-148.465	-110.492			3-4	-5	-3	0	-2	-1	-3	-1	-3	-2	-4	-3	-2
	4-5	3.8924	2.72418	3.31222	2.4826	1.76505	1.90719	2.97744	1.76065	3.54619	3.24417	3.70361	1.84081			4-5	-123.132	-121.583	-127.625	-99.1797	-81.6264	-96.3442	-127.768	-125.103	-116.64	-139.799	-151.458	-120.753			4-5	-5	-4	0	-3	-1	-3	-1	-2	-2	-4	-4	-1
	5-6	4.31801	2.8237	3.24131	2.74881	1.98714	2.05749	2.85478	2.22993	3.63048	3.24477	3.87853	2.19897			5-6	-129.176	-128.844	-131.134	-102.411	-89.6071	-102.556	-138.179	-132.404	-127.104	-143.362	-160.49	-123.95			5-6	-5	-3	-1	-2	0	-3	-1	-3	-2	-5	-3	-2
	6-7	4.30889	3.36513	3.13465	2.70981	2.53172	2.14009	3.14452	2.06148	4.14359	3.56417	4.19139	2.26286			6-7	-135.483	-141.5	-135.982	-108.369	-100.575	-108.421	-144.217	-136.47	-132.611	-153.771	-165.486	-133.034			6-7	-5	-4	-1	-4	-1	-4	-2	-3	-3	-5	-4	-2
	7-8	4.86398	3.50513	3.66737	2.82805	2.47317	2.53009	3.34691	2.17793	4.04905	3.21811	4.18841	2.39773			7-8	-143.834	-148.274	-140.649	-112.983	-103.454	-109.405	-149.955	-141.393	-139.318	-153.786	-170.708	-138.958			7-8	-5	-4	-1	-3	-2	-4	-2	-3	-2	-5	-5	-1
	8-9	4.94333	3.45909	3.57101	3.29048	2.63762	2.53943	3.71548	2.46231	4.34905	3.55568	4.14878	2.05063			8-9	-148.579	-147.821	-143.528	-117.634	-105.871	-112.338	-156.277	-146.759	-145.438	-156.907	-174.388	-139.784			8-9	-6	-5	-1	-3	-2	-4	-2	-2	-2	-5	-3	-2
	9-10	4.94764	3.81037	3.66556	3.27648	2.78822	2.48921	3.95278	2.14661	4.98833	4.00639	4.44538	2.46892			9-10	-151.191	-154.625	-147.311	-121.019	-107.872	-119.405	-161.382	-151.977	-152.049	-159.697	-176.936	-142.942			9-10	-6.22222	-4.66667	-0.88889	-2.88889	-1.77778	-4	-2.66667	-3.55556	-2.66667	-6	-3.77778	-1.77778
		Scn8aSR/SR KI + GNE-4076 (n=11)															Scn8aSR/SR KI + GNE-4076 (n=11)															Scn8aSR/SR KI + GNE-4076 (n=11)
	Time (sec)	Cell 1	Cell 2	Cell 3	Cell 4	Cell 5	Cell 6	Cell 7	Cell 8	Cell 9	Cell 10	Cell 11				Time (sec)	Cell 1	Cell 2	Cell 3	Cell 4	Cell 5	Cell 6	Cell 7	Cell 8	Cell 9	Cell 10	Cell 11				Time (sec)	Cell 1	Cell 2	Cell 3	Cell 4	Cell 5	Cell 6	Cell 7	Cell 8	Cell 9	Cell 10	Cell 11
	0-1	0.690989	0.21283	0.36349	0.26667	0.60637	0.49725	0.55895	0.3475	0.45682	0.55822	0.6419				0-1	-20.2289	-9.75252	-26.4492	-24.9405	-16.3571	-22.2625	-26.286	-13.1935	-13.6253	-34.6794	-26.3333				0-1	-1	-1	1	0	-1	-1	-1	-2	-1	1	0
	1-2	2.56073	0.41444	0.98838	1.84015	1.75108	1.35458	1.51583	1.22417	1.31926	1.3825	1.60554				1-2	-74.0879	-27.0926	-78.8603	-80.185	-58.9632	-68.4954	-83.4521	-55.6971	-54.8148	-104.795	-83.2083				1-2	-1	-3	1	-1	-3	-2	-4	-3	0	2	2
	2-3	2.86945	0.07889	0.99683	1.98374	1.93214	1.37867	1.80118	1.38972	1.30333	1.52375	1.6214				2-3	-99.4725	-42.2222	-91.5492	-107.416	-72.0516	-93.2593	-105.351	-80.4931	-66.8704	-126.461	-103.444				2-3	-1	-2	1	-1	-2	-3	-3	-4	0	2	1
	3-4	3.23881	0.34926	1.44333	2.30681	2.11159	1.96533	1.69804	1.52235	1.31996	1.69098	1.22495				3-4	-118.885	-53.6296	-106.786	-127.672	-77.5932	-108.893	-128.282	-98.358	-78.0861	-146.445	-116.8				3-4	-2	-3	0	-1	-2	-3	-3	-5	-1	3	1
	4-5	3.35214	0.01022	1.42394	2.5781	1.83048	1.57289	1.59542	1.55871	1.41148	1.73042	1.47873				4-5	-133.524	-64.6389	-118.716	-147.236	-87.145	-119.604	-143.567	-111.737	-87.75	-160.326	-128.722				4-5	-2	-2	1	-1	-3	-3	-4	-5	0	2	1
	5-6	3.25548	-0.02037	1.46429	2.42733	2.01714	1.58667	1.95686	1.74806	1.20407	1.84667	1.55667				5-6	-149.218	-71.3148	-128.536	-160.147	-89.8117	-134.259	-159.322	-127.465	-92.5891	-175.622	-135.81				5-6	-2	-3	0	-1	-3	-3	-3	-4	-2	3	0
	6-7	3.65436	-0.09711	1.50882	2.67643	2.06199	1.33955	1.95686	2.00962	1.08976	1.86542	1.77784				6-7	-161.829	-80.2722	-132.705	-175.498	-93.3874	-142.237	-171.831	-137.949	-94.4978	-182.784	-146.578				6-7	-2	-2	1	-2	-3	-3	-3	-5	-1	2	1
	7-8	3.6826	0.01296	1.33857	2.90117	1.98199	1.58619	2.03137	2.28477	1.16466	2.05417	1.98095				7-8	-174.706	-86.7778	-141.119	-187.8	-96.7208	-153.644	-184.9	-149.222	-99.2037	-192.388	-155.202				7-8	-3	-3	0	-1	-3	-4	-3	-5	-1	2	0
	8-9	3.66937	-0.08711	1.56238	2.96032	1.8832	1.58044	2.03542	2.09083	1.32518	2.07292	1.56851				8-9	-183.552	-90.0556	-144.274	-196.248	-96.5087	-162.581	-194.702	-158.529	-105.935	-201.576	-163.511				8-9	-2	-2	0	-2	-3	-3	-4	-6	0	2	1
	9-10	3.48866	0.22222	1.47289	2.93143	1.77492	1.65436	2.10875	2.32417	1.31363	1.96356	1.85634				9-10	-193.812	-98.5764	-152.302	-203.379	-95.5794	-168.422	-205.379	-170.246	-108.359	-207.702	-167.564				9-10	-1.77778	-3.11111	0.44444	-2.88889	-4	-3.55556	-2.22222	-4.88889	-1.33333	2.66667	0.44444

## Sheet: Figure 6D
	D Threshold (mV)			D Peak dV/dt (V/s)			D Instantaneous Frequency (Hz)
	Scn2aSR/SR KI + GNE-4076 (n=12 cells)	Scn8aSR/SR KI + GNE-4076 (n=11 cells)		Scn2aSR/SR KI + GNE-4076 (n=12 cells)	Scn8aSR/SR KI + GNE-4076 (n=11 cells)		Scn2aSR/SR KI + GNE-4076 (n=12 cells)	Scn8aSR/SR KI + GNE-4076 (n=11 cells)
	4.94764	3.48866		-151.191	-193.812		-6.22222	-1.77778
	3.81037	0.22222		-154.625	-98.5764		-4.66667	-3.11111
	3.66556	1.47289		-147.311	-152.302		-0.88889	0.44444
	3.27648	2.93143		-121.019	-203.379		-2.88889	-2.88889
	2.78822	1.77492		-107.872	-95.5794		-1.77778	-4
	2.48921	1.65436		-119.405	-168.422		-4	-3.55556
	3.95278	2.10875		-161.382	-205.379		-2.66667	-2.22222
	2.14661	2.32417		-151.977	-170.246		-3.55556	-4.88889
	4.98833	1.31363		-152.049	-108.359		-2.66667	-1.33333
	4.00639	1.96356		-159.697	-207.702		-6	2.66667
	4.44538	1.85634		-176.936	-167.564		-3.77778	0.44444
	2.46892			-142.942			-1.77778
