# Supplementary material for: Differential roles of NaV1.2 and NaV1.6 in neocortical pyramidal cell excitability
Source: eLife. 2025 Jul 15;14:RP105696. doi: 10.7554/eLife.105696 (PMC12263156; doi:10.7554/eLife.105696)
Supplement: Figure 7—figure supplement 1—source data 1. [file elife-105696-fig7-figsupp1-data1.xlsx]

## Sheet: Figure 7-S1A
	Threshold (mV)														Instantaneous Frequency (Hz)
		Wildtype no drug (n=7 cells)														Wildtype no drug (n=7 cells)
	Time (sec)	Cell 1	Cell 2	Cell 3	Cell 4	Cell 5	Cell 6	Cell 7							Time (sec)	Cell 1	Cell 2	Cell 3	Cell 4	Cell 5	Cell 6	Cell 7
	0-5	-46.6093	-47.0733	-44.1822	-45.3826	-45.2153	-47.3668	-46.0234							0-5	7.2	19.6	8	3.6	9.6	15.2	8.6
	5-10	-46.7804	-47.7796	-44.4857	-45.6976	-45.6767	-48.6623	-46.5545							5-10	6.2	17	6.8	3.4	9	12.6	7.8
	10-15	-46.4896	-46.8371	-44.6079	-45.61	-45.3948	-47.8417	-46.3242							10-15	7.6	17.4	7.6	4.4	10.2	13.8	8.8
	15-20	-47.0977	-47.501	-44.4695	-45.0411	-45.7076	-47.8528	-46.5667							15-20	6.4	15.6	6.6	3.6	8.6	13	7.6
	20-25	-46.2489	-47.1395	-44.3063	-44.6708	-44.7317	-47.2915	-45.8198							20-25	7.8	17.2	7.2	4.2	9.8	12.8	8.4
	25-30	-46.6408	-47.2467	-44.3251	-44.6759	-45.2679	-47.3843	-46.1186							25-30	6.6	15.6	7	4.2	8.4	12.8	7.8
	30-35	-47.206	-47.5346	-44.6118	-45.5127	-45.6035	-47.6725	-46.5121							30-35	7.8	18	8	4.4	10.6	14.2	9
	35-40	-46.7242	-47.1812	-44.0823	-45.0904	-45.119	-47.2322	-46.1705							35-40	6.6	17.2	7	3.6	9.4	13.4	7.4
	40-45	-46.1142	-47.4343	-44.2551	-44.7519	-45.2765	-47.8041	-45.9435							40-45	9.6	18.4	9.2	5.4	11.4	14.4	9.6
	45-50	-46.2789	-47.2749	-44.4179	-45.5814	-44.9074	-47.3995	-46.0438							45-50	9.6	19	8.8	4.8	11.6	14.6	9.4
	50-55	-46.1632	-47.603	-44.2665	-44.7154	-45.131	-47.8111	-46.0327							50-55	7.6	16.2	7.6	3.2	9.8	12.6	8
	55-60	-45.8772	-47.5791	-44.1222	-45.058	-45.104	-47.073	-45.9027							55-60	9.2	17.2	8.4	4	11.4	14	9.4
		Wildtype + GNE-4076 (n=8)														Wildtype + GNE-4076 (n=8)
	Time (sec)	Cell 1	Cell 2	Cell 3	Cell 4	Cell 5	Cell 6	Cell 7	Cell 8						Time (sec)	Cell 1	Cell 2	Cell 3	Cell 4	Cell 5	Cell 6	Cell 7	Cell 8
	0-5	-47.3747	-46.9475	-46.3597	-45.292	-48.1531	-44.1709	-45.7818	-46.3662						0-5	8.6	13	13	9.8	16	15	9.4	5.6
	5-10	-48.1535	-47.4681	-47.3631	-45.8029	-48.4399	-44.1852	-45.963	-46.7351						5-10	8.4	10.8	6	8.2	15.2	13.2	9.4	4.6
	10-15	-47.9548	-47.0143	-46.4817	-45.8788	-47.6459	-43.6834	-44.3674	-46.3609						10-15	10	11.2	8.4	8.8	15.2	12.6	16.8	6
	15-20	-47.7907	-46.4753	-46.5072	-45.5172	-47.104	-43.0378	-44.2178	-46.1761						15-20	8.6	10.6	7	8	14.4	12.2	15.2	4.8
	20-25	-46.9373	-45.9114	-45.3197	-44.7205	-46.5576	-41.8752	-43.6611	-45.4141						20-25	8.8	10.8	7.8	8.8	14.4	12	13.8	5.4
	25-30	-46.8053	-45.5826	-45.9614	-44.6647	-45.9802	-41.2094	-42.3853	-45.7117						25-30	7.8	10.2	5.6	8.2	13.6	11.8	15	4.8
	30-35	-46.8414	-45.4316	-45.8894	-44.8132	-45.7318	-41.3037	-42.3468	-45.7844						30-35	9.8	11.8	6.4	9.2	15	12.2	16.4	5.8
	35-40	-46.1914	-44.992	-45.7412	-44.0288	-44.882	-40.6191	-41.363	-44.9669						35-40	8.2	10.6	5.6	8	13.6	10.4	14	5.2
	40-45	-46.1281	-44.8402	-44.6322	-44.0861	-44.9906	-40.0295	-41.1259	-45.1118						40-45	10.2	12.4	7.2	10	15.4	11.8	15.8	6.8
	45-50	-46.0447	-44.5884	-45.4878	-43.8678	-44.1875	-39.8248	-40.0462	-45.2185						45-50	9.6	12	6	9.6	14.2	11.4	14.2	6.2
	50-55	-45.4507	-44.4567	-45.0425	-43.6865	-43.3367	-39.3556	-40.6315	-44.7347						50-55	8.6	10.2	4.2	8	13.8	10.6	11.4	4.8
	55-60	-44.7003	-43.2264	-44.8709	-42.928	-42.1848	-38.2025	-39.8528	-44.3575						55-60	9.6	12	5.4	9	15.4	10.8	10.6	5.4
		8a/2aSR/SR KI + GNE-4076 (n=6)														8a/2aSR/SR KI + GNE-4076 (n=6)
	Time (sec)	Cell 1	Cell 2	Cell 3	Cell 4	Cell 5	Cell 6								Time (sec)	Cell 1	Cell 2	Cell 3	Cell 4	Cell 5	Cell 6
	0-5	-46.2428	-50.2607	-47.1441	-46.5822	-46.333	-46.0411								0-5	12.6	9	6.8	7.8	13.2	10.8
	5-10	-46.6711	-50.0876	-48.4081	-47.9393	-47.1891	-47.3833								5-10	11.4	8.2	4.6	6	12	9
	10-15	-46.2153	-50.4604	-47.9434	-48.0442	-46.4795	-46.7289								10-15	11.4	9	6.6	8	12.4	11.4
	15-20	-46.2481	-50.2072	-47.7505	-48.0499	-46.3057	-46.8942								15-20	11	8.2	6.2	6.2	11.6	9.2
	20-25	-46.1671	-49.8494	-47.6718	-46.9032	-45.6409	-46.4393								20-25	10.4	8.8	6.2	7.6	12	10
	25-30	-45.7488	-50.1052	-48.3178	-47.8301	-45.4839	-45.6228								25-30	9.8	8	5.4	7.4	11.4	10.4
	30-35	-46.0937	-50.415	-48.5445	-48.3206	-45.6143	-47.0981								30-35	10.8	9.6	6.2	9	12.8	12.6
	35-40	-46.0503	-49.491	-48.2926	-47.7461	-45.2529	-46.6254								35-40	10.4	8.4	5.8	7.6	11.8	10.8
	40-45	-46.188	-50.0521	-48.1005	-47.5422	-45.3925	-46.6372								40-45	10.8	9.8	7.6	9.6	13.2	12.8
	45-50	-45.9364	-49.996	-48.3373	-47.8932	-44.6802	-46.6966								45-50	10.8	9.6	6.4	8.4	13.8	11.8
	50-55	-46.3954	-50.2202	-47.9424	-48.1554	-45.0178	-46.3848								50-55	9.2	8.6	6	7	12	10.2
	55-60	-45.6936	-49.6571	-47.9053	-47.5174	-44.57	-45.9314								55-60	10.2	10.2	7.6	8.6	13.4	12.6
		Scn2aSR/SR KI + GNE-4076 (n=12)														Scn2aSR/SR KI + GNE-4076 (n=12)
	Time (sec)	Cell 1	Cell 2	Cell 3	Cell 4	Cell 5	Cell 6	Cell 7	Cell 8	Cell 9	Cell 10	Cell 11	Cell 12		Time (sec)	Cell 1	Cell 2	Cell 3	Cell 4	Cell 5	Cell 6	Cell 7	Cell 8	Cell 9	Cell 10	Cell 11	Cell 12
	0-5	-47.434	-47.2686	-45.7795	-46.2265	-45.7154	-48.3996	-44.4554	-44.4985	-45.3404	-48.8554	-45.8084	-49.4523		0-5	8	7.4	8.2	7.4	6.6	6.6	9.4	11.2	14.8	12.2	7	11.2
	5-10	-47.8675	-47.5924	-46.083	-46.8078	-45.3869	-48.3645	-44.6237	-45.1467	-45.3001	-51.2672	-46.955	-50.6401		5-10	7.6	5.8	7.2	5.8	5.8	5.6	8	9.4	14.6	16	5.6	9
	10-15	-48.0468	-47.1371	-45.9343	-46.1817	-44.894	-48.2282	-43.8357	-45.0094	-44.702	-50.1926	-46.1679	-49.8255		10-15	8.2	7	8.2	7.8	7.6	7	9.2	9.4	14	14.8	6.6	10.6
	15-20	-48.337	-47.1855	-45.6381	-46.5004	-45.2409	-48.6505	-43.9544	-45.0547	-44.8783	-50.5993	-46.3173	-50.1644		15-20	6.2	5.6	7	6	6.2	5.6	8.8	7.8	12.6	11.8	5.4	8.8
	20-25	-46.8969	-46.1825	-44.5844	-45.3873	-44.364	-46.9364	-43.2259	-44.2029	-44.0085	-49.4125	-46.0387	-49.2656		20-25	7.4	6.4	8.4	6.8	7	7	8.8	8.2	13.6	12.2	6	9.6
	25-30	-47.4394	-46.4299	-45.1965	-46.3326	-44.8908	-47.8617	-43.213	-43.86	-43.7575	-49.3962	-46.318	-49.3923		25-30	6.4	5.4	6.4	5.8	6.4	5.6	7.2	7.4	12.8	11	5.4	9.2
	30-35	-47.8111	-46.6736	-45.2914	-46.2699	-44.6335	-48.2602	-43.1301	-44.2729	-43.8388	-49.5242	-46.6595	-49.7086		30-35	7.8	6	8.4	6.2	8.8	7.4	8.6	8.6	13.2	12.2	5.8	11
	35-40	-47.7255	-45.5687	-44.7782	-45.7157	-43.937	-47.4613	-42.7578	-43.7959	-43.5489	-49.2185	-46.2716	-48.8025		35-40	6.8	5.8	6.8	6.2	7	6	7.4	6.8	13.2	11	5.4	10.6
	40-45	-47.8301	-45.6716	-44.1295	-45.3865	-43.9945	-47.2969	-42.2758	-43.3767	-43.5505	-48.9275	-45.8095	-49.2205		40-45	8.2	6.8	8.8	7.4	10	8.2	10.2	9	14.2	12.2	6.6	11
	45-50	-47.6986	-45.5341	-44.1533	-45.3641	-43.9588	-47.6537	-41.7665	-43.2369	-43.1109	-48.2142	-45.8462	-48.8462		45-50	7.4	6.6	8	7.2	8.8	7.2	9.6	8.6	13.2	11.8	6.4	11
	50-55	-47.0513	-45.4805	-44.2484	-45.0899	-44.2012	-47.3176	-42.6759	-42.8846	-42.8692	-48.5625	-45.0432	-48.8071		50-55	6	5	6	5	6.8	5.6	7.8	7.2	12	10	5	8.4
	55-60	-47.0623	-44.7362	-43.9341	-44.648	-43.4688	-46.7114	-42.2197	-42.6487	-42.2277	-47.8378	-45.2326	-48.1363		55-60	7.4	6	7	7.2	8.2	6.8	9.6	7.8	12.2	11.6	5.6	9.6
		Scn8aSR/SR KI + GNE-4076 (n=12)														Scn8aSR/SR KI + GNE-4076 (n=12)
	Time (sec)	Cell 1	Cell 2	Cell 3	Cell 4	Cell 5	Cell 6	Cell 7	Cell 8	Cell 9	Cell 10	Cell 11	Cell 12		Time (sec)	Cell 1	Cell 2	Cell 3	Cell 4	Cell 5	Cell 6	Cell 7	Cell 8	Cell 9	Cell 10	Cell 11	Cell 12
	0-5	-47.3697	-45.9575	-44.5972	-45.2633	-46.4813	-48.8983	-47.0524	-45.739	-45.6104	-45.3148	-46.1138	-48.3143		0-5	8.8	14.2	8.6	6.6	14.2	6.4	13	9.2	8.2	7.4	7.8	11
	5-10	-48.1677	-46.6226	-44.6711	-45.411	-47.9632	-49.5497	-47.5538	-46.6936	-45.9487	-45.8715	-46.0939	-49.6231		5-10	7.6	14.8	8.8	5.2	12.8	5.2	12	8.6	6.6	5.8	7.2	9.8
	10-15	-47.8687	-46.1945	-44.2785	-45.41	-46.6164	-49.3135	-47.4152	-45.3911	-45.9849	-45.7925	-45.4733	-48.998		10-15	9.4	13.8	10	7.2	15	7.4	12.4	11.6	7.4	6.6	9.6	11.4
	15-20	-48.0034	-46.0544	-44.0068	-45.0595	-46.6921	-49.3271	-47.446	-46.1247	-45.9965	-46.0154	-46.25	-48.7613		15-20	8.6	14.4	9.6	5.4	13	5.6	11.8	9.4	6.8	5.2	8	10
	20-25	-47.0503	-46.1341	-43.6047	-43.8329	-45.9123	-48.1025	-46.9251	-44.2619	-45.0662	-44.7237	-44.7206	-48.1115		20-25	9.8	15	10.4	6.6	14.2	7	13.2	11	8	7.2	9.2	11.2
	25-30	-46.8313	-46.052	-43.414	-44.4247	-46.8301	-48.8283	-47.0989	-44.7823	-45.6697	-45.663	-45.234	-48.642		25-30	9.4	14	10	6	12.4	5.8	12.2	9.8	7	5.8	8	10.6
	30-35	-47.6293	-46.2671	-43.7119	-44.777	-47.086	-49.5724	-47.1852	-45.4828	-45.9182	-46.0586	-45.6389	-49.2588		30-35	10.2	15	12.2	7	16.2	6.8	13.4	11.6	9	5.6	10	11.2
	35-40	-46.9486	-46.0255	-43.3709	-44.7379	-46.6864	-49.0715	-47.0958	-44.9805	-45.3393	-45.6384	-45.141	-48.28		35-40	9.8	14	11.6	6.4	14	6.6	13	11	7.4	6	9	11.4
	40-45	-47.1731	-46.0875	-43.1451	-44.3827	-46.9985	-48.5828	-46.9408	-44.862	-45.2645	-45.1954	-45.2053	-48.4821		40-45	11	15.8	13.2	8.4	17.2	8.2	14.2	12.6	9.8	7	10.6	12.8
	45-50	-46.6079	-45.9704	-42.7058	-44.8113	-46.0572	-49.3287	-46.5685	-44.6409	-45.6139	-45.5867	-45.0371	-48.9652		45-50	10.6	15.2	13	7.8	16	7.8	14.6	13	8.8	7.2	11.2	12.4
	50-55	-46.5546	-45.7737	-43.1138	-44.1153	-46.3008	-48.6587	-47.1498	-44.8088	-45.2772	-44.3427	-44.9413	-48.4078		50-55	9.2	13.8	11.6	6.2	15.6	6	12.6	11.6	7.2	6	9	11
	55-60	-46.3617	-45.6348	-42.7617	-44.0887	-46.0768	-48.4946	-46.6667	-44.7495	-44.6816	-45.3671	-44.5925	-48.2248		55-60	11	15.4	13	8.2	16.2	7.2	13.6	13.2	8.6	6.4	11.8	13.4

## Sheet: Figure 7-S1B
	D Threshold (mV)
	Wildtype no drug (n=7 cells)	Wildtype + GNE-4076 (n=8 cells)	Scn8aSR/SR KI + GNE-4076 (n=12 cells)	Scn2aSR/SR KI + GNE-4076 (n=12 cells)	8a/2aSR/SR KI + GNE-4076 (n=6 cells)
	0.732013	2.67445	1.008	0.371719	0.549157
	-0.505804	3.72104	0.322659	2.53243	0.603616
	0.0599444	1.48883	1.83547	1.84542	-0.761145
	0.324592	2.36397	1.17467	1.57852	-0.935142
	0.111301	5.96823	0.404525	2.24657	1.76303
	0.29389	5.96842	0.403704	1.68822	0.109683
	0.120716	5.92901	0.385743	2.23564
		2.00866	0.989506	1.84973
			0.928856	3.11271
			-0.0523088	1.01759
			1.5213	0.575762
			0.0895265	1.31601
	D Instantaneous Frequency (Hz)
	Wildtype no drug (n=7 cells)	Wildtype + GNE-4076 (n=8 cells)	Scn8aSR/SR KI + GNE-4076 (n=12 cells)	Scn2aSR/SR KI + GNE-4076 (n=12 cells)	8a/2aSR/SR KI + GNE-4076 (n=6 cells)
	2	1	2.2	-0.6	-2.4
	-2.4	-1	1.2	-1.4	1.2
	0.4	-7.6	4.4	-1.2	0.8
	0.4	-0.8	1.6	-0.2	0.8
	1.8	-0.6	2	1.6	0.2
	-1.2	-4.2	0.8	0.2	1.8
	0.8	1.2	0.6	0.2
		-0.2	4	-3.4
			0.4	-2.6
			-1	-0.6
			4	-1.4
			2.4	-1.6
