# Supplementary material for: Differential roles of NaV1.2 and NaV1.6 in neocortical pyramidal cell excitability
Source: eLife. 2025 Jul 15;14:RP105696. doi: 10.7554/eLife.105696 (PMC12263156; doi:10.7554/eLife.105696)
Supplement: Figure 7—source data 1. [file elife-105696-fig7-data1.xlsx]

## Sheet: Figure 7C
	Threshold (mV)															Instantaneous Frequency (Hz)
		Wildtype no drug (n=7 cells)															Wildtype no drug (n=7 cells)
	Time (sec)	Cell 1	Cell 2	Cell 3	Cell 4	Cell 5	Cell 6	Cell 7								Time (sec)	Cell 1	Cell 2	Cell 3	Cell 4	Cell 5	Cell 6	Cell 7
-2 to -1 min interval	0-5	-46.6093	-47.0733	-44.1822	-45.3826	-45.2153	-47.3668	-46.0234							-2 to -1 min interval	0-5	7.2	19.6	8	3.6	9.6	15.2	8.6
	5-10	-46.7804	-47.7796	-44.4857	-45.6976	-45.6767	-48.6623	-46.5545								5-10	6.2	17	6.8	3.4	9	12.6	7.8
	10-15	-46.4896	-46.8371	-44.6079	-45.61	-45.3948	-47.8417	-46.3242								10-15	7.6	17.4	7.6	4.4	10.2	13.8	8.8
	15-20	-47.0977	-47.501	-44.4695	-45.0411	-45.7076	-47.8528	-46.5667								15-20	6.4	15.6	6.6	3.6	8.6	13	7.6
	20-25	-46.2489	-47.1395	-44.3063	-44.6708	-44.7317	-47.2915	-45.8198								20-25	7.8	17.2	7.2	4.2	9.8	12.8	8.4
	25-30	-46.6408	-47.2467	-44.3251	-44.6759	-45.2679	-47.3843	-46.1186								25-30	6.6	15.6	7	4.2	8.4	12.8	7.8
	30-35	-47.206	-47.5346	-44.6118	-45.5127	-45.6035	-47.6725	-46.5121								30-35	7.8	18	8	4.4	10.6	14.2	9
	35-40	-46.7242	-47.1812	-44.0823	-45.0904	-45.119	-47.2322	-46.1705								35-40	6.6	17.2	7	3.6	9.4	13.4	7.4
	40-45	-46.1142	-47.4343	-44.2551	-44.7519	-45.2765	-47.8041	-45.9435								40-45	9.6	18.4	9.2	5.4	11.4	14.4	9.6
	45-50	-46.2789	-47.2749	-44.4179	-45.5814	-44.9074	-47.3995	-46.0438								45-50	9.6	19	8.8	4.8	11.6	14.6	9.4
	50-55	-46.1632	-47.603	-44.2665	-44.7154	-45.131	-47.8111	-46.0327								50-55	7.6	16.2	7.6	3.2	9.8	12.6	8
	55-60	-45.8772	-47.5791	-44.1222	-45.058	-45.104	-47.073	-45.9027								55-60	9.2	17.2	8.4	4	11.4	14	9.4
-1 to 0 min interval	0-5	-39.5897	-42.7396	-40.3307	-42.1011	-39.7918	-40.7369	-40.7716							-1 to 0 min interval	0-5	26.6	32.6	24.6	27.8	24	27.2	24
	5-10	-39.1054	-40.4352	-40.0322	-41.8296	-38.9933	-39.4556	-40.423								5-10	30	37.2	27.4	34	27.6	30.2	26.8
	10-15	-38.6231	-38.8714	-39.5395	-41.3823	-38.5058	-38.7128	-40.614								10-15	28.8	35.8	24.8	33	25.4	27.6	25
	15-20	-38.8927	-38.2812	-39.801	-41.3711	-38.7085	-38.8031	-41.0429								15-20	28.2	34.4	24.6	33.2	24.6	27	24.4
	20-25	-38.6668	-38.1082	-39.4668	-41.0518	-38.3845	-38.9503	-40.7916								20-25	27.6	33.6	24.6	32.8	25.4	26.6	24.4
	25-30	-38.4571	-37.533	-39.4291	-40.9888	-38.1947	-39.1267	-41.0157								25-30	26.2	31.8	24.8	32	24.6	25.8	23.6
	30-35	-37.8725	-37.7039	-39.3627	-41.1042	-37.9806	-38.8625	-41.0345								30-35	26	32	24.8	32.4	24.8	26.2	24.2
	35-40	-37.494	-36.673	-39.0696	-40.7368	-37.7093	-38.2615	-40.5433								35-40	24.8	30.4	24.8	32.6	24	25.2	23.6
	40-45	-36.8295	-35.8654	-38.8331	-40.6322	-37.4369	-37.6028	-40.4964								40-45	22.6	29.4	24.6	32.4	23.8	23.4	23.8
	45-50	-36.395	-34.487	-38.1733	-40.3847	-37.0646	-37.4724	-40.385								45-50	23.4	30.2	25	32.6	23.6	24.2	23.2
	50-55	-36.5139	-34.4443	-38.344	-40.5513	-37.2708	-37.2161	-40.3372								50-55	23	29.4	24.6	32	23.6	23.2	23.4
	55-60	-35.2452	-32.7801	-37.7572	-40.5274	-36.25	-36.1744	-39.9415								55-60	20.8	27.8	24.8	33	23.4	21.4	23
0 to 1 min interval	0-5	-42.7713	-39.8801	-41.3289	-40.4603	-40.515	-43.2575	-42.2187							0 to 1 min interval	0-5	9.6	11.2	4.8	9.8	11	11.8	8.2
	5-10	-44.9363	-44.3729	-44.1231	-44.119	-43.7297	-46.6473	-46.3287								5-10	13.4	15.6	5.6	5.4	12.6	13.4	6.4
	10-15	-45.301	-44.8549	-43.4396	-43.6315	-44.2553	-46.6982	-45.9232								10-15	12	13.4	6.8	6.6	10.6	12.6	7
	15-20	-44.6358	-44.9797	-42.709	-44.1503	-43.6133	-46.8377	-45.6769								15-20	13.6	14.8	13	8	12.6	14.8	10.2
	20-25	-44.7691	-44.4022	-43.0564	-43.7632	-43.776	-46.7462	-45.5929								20-25	12	15	11.6	7.4	11.2	13.2	9.4
	25-30	-44.5379	-45.143	-42.9006	-43.9619	-43.2946	-46.5865	-45.4256								25-30	11.6	14.4	11.4	7	10.6	12.8	9
	30-35	-45.0756	-45.7109	-43.1801	-44.0098	-44.0597	-47.3176	-45.7184								30-35	11.8	14.8	12.4	7.6	11.6	12.8	10.2
	35-40	-44.7297	-45.8181	-42.8854	-44.0195	-43.6313	-46.8225	-45.5522								35-40	13.6	15.8	13.8	7.4	13	15	11
	40-45	-44.5966	-45.9204	-43.0092	-43.8093	-43.7651	-46.7562	-45.3584								40-45	12.6	15	13	7.2	11.8	13.8	10.6
	45-50	-44.8308	-45.5435	-42.9327	-43.6144	-44.0151	-46.8733	-45.4993								45-50	13	16.4	13.6	7.8	12.4	14	11.6
	50-55	-44.8652	-45.6838	-43.1205	-44.1581	-43.8826	-46.7858	-45.3743								50-55	11	14.2	11.6	5.6	10.6	12	9.4
	55-60	-44.6205	-45.662	-42.9489	-43.8182	-43.7869	-46.7037	-45.6477								55-60	11.4	14.8	12	6	11.2	13	10.2
3 to 4 min interval	0-5	-44.4718	-45.9296	-42.8482	-44.3825	-42.9529	-46.7133	-44.5182							3 to 4 min interval	0-5	10.2	12.4	7.6	4.2	9.8	10.6	8.8
	5-10	-45.0004	-46.4044	-42.9436	-45.5235	-43.3671	-47.0763	-44.6112								5-10	11.2	14.6	9.2	3.8	10.4	12.4	10
	10-15	-45.3043	-46.7563	-43.3131	-45.6825	-43.8998	-47.4154	-44.9736								10-15	12	14.8	9.6	3.8	11.6	12.8	9.8
	15-20	-45.0998	-46.3055	-43.3237	-45.3841	-43.799	-46.9784	-44.4425								15-20	12.2	16.4	10.4	5.8	11.2	13.2	10.6
	20-25	-45.2044	-46.3952	-43.3156	-45.3742	-43.8244	-47.346	-44.5903								20-25	11.4	14.8	9	4.4	11	12.4	9.8
	25-30	-44.581	-46.1951	-43.2343	-44.921	-43.6146	-46.4354	-44.3469								25-30	11.8	15.6	9.2	5.4	10.8	12.8	10.8
	30-35	-44.4508	-46.2902	-43.2256	-44.6492	-43.5082	-46.7656	-44.3383								30-35	11.6	14.6	8.6	4.8	10.4	11.8	9.4
	35-40	-44.9031	-46.4401	-43.4672	-45.5	-44.0256	-47.1196	-44.5854								35-40	12.4	16.6	10.2	5.2	11.2	13	10.2
	40-45	-44.629	-46.2576	-43.1647	-45.1016	-43.4074	-46.813	-44.3055								40-45	12.2	15.2	8.8	5	11	13	10
	45-50	-44.8907	-46.5265	-43.6911	-44.9184	-43.704	-47.019	-44.6003								45-50	12.6	16.6	10.6	6	11.8	13.8	11.6
	50-55	-44.7209	-45.9758	-43.5307	-45.4033	-43.4716	-46.6634	-44.3067								50-55	12.8	16.4	10.6	5.6	12.2	13.4	11.2
	55-60	-45.1005	-46.6328	-43.6861	-45.0736	-43.9838	-46.6897	-44.741								55-60	10.6	14.8	8.8	4.4	9.6	11.8	9.4
		Wildtype + GNE-4076 (n=8)															Wildtype + GNE-4076 (n=8)
	Time (sec)	Cell 1	Cell 2	Cell 3	Cell 4	Cell 5	Cell 6	Cell 7	Cell 8							Time (sec)	Cell 1	Cell 2	Cell 3	Cell 4	Cell 5	Cell 6	Cell 7	Cell 8
-2 to -1 min interval	0-5	-47.3747	-46.9475	-46.3597	-45.292	-48.1531	-44.1709	-45.7818	-46.3662						-2 to -1 min interval	0-5	8.6	13	13	9.8	16	15	9.4	5.6
	5-10	-48.1535	-47.4681	-47.3631	-45.8029	-48.4399	-44.1852	-45.963	-46.7351							5-10	8.4	10.8	6	8.2	15.2	13.2	9.4	4.6
	10-15	-47.9548	-47.0143	-46.4817	-45.8788	-47.6459	-43.6834	-44.3674	-46.3609							10-15	10	11.2	8.4	8.8	15.2	12.6	16.8	6
	15-20	-47.7907	-46.4753	-46.5072	-45.5172	-47.104	-43.0378	-44.2178	-46.1761							15-20	8.6	10.6	7	8	14.4	12.2	15.2	4.8
	20-25	-46.9373	-45.9114	-45.3197	-44.7205	-46.5576	-41.8752	-43.6611	-45.4141							20-25	8.8	10.8	7.8	8.8	14.4	12	13.8	5.4
	25-30	-46.8053	-45.5826	-45.9614	-44.6647	-45.9802	-41.2094	-42.3853	-45.7117							25-30	7.8	10.2	5.6	8.2	13.6	11.8	15	4.8
	30-35	-46.8414	-45.4316	-45.8894	-44.8132	-45.7318	-41.3037	-42.3468	-45.7844							30-35	9.8	11.8	6.4	9.2	15	12.2	16.4	5.8
	35-40	-46.1914	-44.992	-45.7412	-44.0288	-44.882	-40.6191	-41.363	-44.9669							35-40	8.2	10.6	5.6	8	13.6	10.4	14	5.2
	40-45	-46.1281	-44.8402	-44.6322	-44.0861	-44.9906	-40.0295	-41.1259	-45.1118							40-45	10.2	12.4	7.2	10	15.4	11.8	15.8	6.8
	45-50	-46.0447	-44.5884	-45.4878	-43.8678	-44.1875	-39.8248	-40.0462	-45.2185							45-50	9.6	12	6	9.6	14.2	11.4	14.2	6.2
	50-55	-45.4507	-44.4567	-45.0425	-43.6865	-43.3367	-39.3556	-40.6315	-44.7347							50-55	8.6	10.2	4.2	8	13.8	10.6	11.4	4.8
	55-60	-44.7003	-43.2264	-44.8709	-42.928	-42.1848	-38.2025	-39.8528	-44.3575							55-60	9.6	12	5.4	9	15.4	10.8	10.6	5.4
-1 to 0 min interval	0-5	-42.2824	-38.1629	-37.7584	-38.5324	-37.3868	-27.7992	-34.8856	-41.2095						-1 to 0 min interval	0-5	25.4	23.6	22	22	19	12.6	19.2	25
	5-10	-41.7289	-36.476	-34.6905	-37.7036	-37.127	-29.0033	-34.2418	-40.6708							5-10	29	26.2	23.4	24.2	21	4	22	29
	10-15	-39.765	-34.2943	-31.609	-36.0561	-34.7722		-31.783	-39.482							10-15	26.2	23.2	17.8	21.4	17	0.4	19.4	25.8
	15-20	-38.7363	-32.9448	-28.2885	-35.4786	-34.8173		-31.1421	-38.7991							15-20	25	22.2	16.4	20.6	18.6	0.2	19.4	24.8
	20-25	-36.9733	-30.6214	-26.1648	-33.9635	-32.2922		-28.2896	-37.6922							20-25	24	20.2	9.6	19.6	16.8	0.2	18.6	23.8
	25-30	-35.6838	-28.6355	-24.8197	-32.7788	-31.2602		-25.4737	-37.0345							25-30	22.6	18.6	4.8	18.2	15.6	0.4	16.2	22.4
	30-35	-34.4645	-27.762	-24.4497	-31.6254	-29.9739		-24.6819	-36.1907							30-35	22	19	4	17.8	15.4	0.4	15.4	22.4
	35-40	-31.8833	-25.733	-12.7433	-29.5105	-28.5847		-22.673	-35.2787							35-40	20.2	16.6	1.4	15.2	14.6	0.4	12.8	21.2
	40-45	-30.0554	-23.8657		-27.9379	-27.6625		-20.2931	-34.0067							40-45	19	14.4	1	14.2	13.6	0.4	6.2	19
	45-50	-27.8344	-22.4313	-14.4533	-25.6385	-26.1136		-20.4333	-32.6009							45-50	17	13.2	1.2	13	11.8	0.2	4.4	19.4
	50-55	-25.9662	-19.3553	-26.66	-23.4111	-24.9419	-15.6267	-17.7567	-31.7527							50-55	16.8	14.2	0.8	12.8	11.8	0.2	2.4	17.6
	55-60	-23.738	-18.3784		-21.9929	-23.6778		-19.775	-30.099							55-60	15.8	12.6	0.2	11.6	9.4	0.4	2.2	17.8
0 to 1 min interval	0-5	-28.882	-28.7621	-41.2833	-30.0255	-29.2971	-31.2229	-30.0296	-31.6194						0 to 1 min interval	0-5	4	5.8	0.8	2.2	5.6	2	3.6	4.6
	5-10	-34.5028	-34.9483	-39.98	-36.9827	-34.022	-25.519	-30.6819	-38.3929							5-10	5.2	6.4	1	3.4	7.2	3	5.6	2.8
	10-15	-34.6933	-34.8607	-39.7467	-35.864	-33.9125	-30.5663	-30.462	-37.5976							10-15	5.4	7.2	0.8	4	8.2	3.6	5.4	2.2
	15-20	-35.8659	-34.5929	-39.5992	-36.1487	-33.6896	-31.398	-30.3541	-37.9764							15-20	6.8	8.6	1.6	6	9.2	5	6.8	4.8
	20-25	-36.1267	-35.2702	-40.4789	-35.7977	-34.4615	-32.4632	-29.9602	-37.974							20-25	6.2	8.4	1.2	5.2	8.8	4.2	6.6	4.2
	25-30	-36.1428	-35.4287	-40.6472	-35.714	-33.368	-31.8072	-30.2363	-38.0853							25-30	5.8	7.8	2.6	5.6	9	4.6	6.4	4
	30-35	-37.1606	-35.8785	-40.3513	-36.5178	-33.9171	-32.3064	-31.0554	-38.5415							30-35	6.8	8.2	2	6	9.6	5.4	6.6	3.6
	35-40	-36.9589	-36.2794	-42.1119	-35.8716	-33.1972	-32.9241	-31.3192	-38.5197							35-40	7	9.6	1.8	6.8	9.6	5.2	6.8	5
	40-45	-37.0926	-36.1284	-41.3311	-36.2539	-33.7233	-30.5536	-28.4375	-37.8813							40-45	7	9	1.8	6.6	9.8	5.8	7	4
	45-50	-37.1331	-36.0189	-41.4675	-35.5672	-33.3965	-30.9531	-29.6321	-38.3085							45-50	7.2	9.6	3.2	7.8	10	5.8	7.4	5
	50-55	-37.2943	-36.3742	-42.9873	-36.3677	-33.2141	-31.7087	-29.5376	-39.0296							50-55	5.4	7.6	2	5.4	9.2	4.6	5.6	3.6
	55-60	-37.3645	-36.5588	-41.6256	-35.7707	-32.5554	-30.5879	-29.5896	-38.9824							55-60	6.2	8.8	2.4	6	9.8	5.6	6	3.4
3 to 4 min interval	0-5	-38.1183	-36.4761	-40.2811		-25.3876	-30.199	-30.6219	-40.1206						3 to 4 min interval	0-5	5.4	7.8	3.8		7.6	4.2	4.2	2.4
	5-10	-38.0298	-36.9312	-39.7308		-25.5103	-29.699	-31.5395	-39.7627							5-10	6	9.2	5.2		9.4	5.2	5	3.4
	10-15	-39.1907	-37.2322	-38.9354		-25.5385	-30.3539	-31.2757	-40.5428							10-15	5.6	9.2	4.6		8.8	4.4	4.6	3.8
	15-20	-38.8398	-37.3045	-38.2998		-26.8895	-31.1314	-32.7564	-39.7789							15-20	6.4	10	6.4		9.4	5.6	6.6	4.8
	20-25	-39.4731	-36.995	-37.9533		-26.3087	-28.8048	-32.3875	-39.9324							20-25	5.8	9.4	5.6		9	5	5	4.2
	25-30	-38.4798	-36.4548	-37.6914		-25.4577	-28.3492	-30.2501	-39.3327							25-30	6	8.8	4.8		7.6	4.8	5	4.2
	30-35	-38.9233	-36.2032	-38.0994		-23.504	-29.8074	-30.9931	-39.6081							30-35	5.6	8	4.4		7.4	5.2	5.4	3.8
	35-40	-39.0769	-37.3711	-38.1726		-25.7997	-28.7067	-31.2751	-40.2529							35-40	6.8	10	3.4		9	5	5.4	3.2
	40-45	-38.8593	-36.1897	-37.8913		-25.0053	-28.0133	-29.6191	-39.7462							40-45	5.4	7.8	3.2		7.6	4	4.6	2.8
	45-50	-38.313	-36.3702	-37.5846		-25.2728	-28.3802	-31.3005	-39.629							45-50	7.4	10.2	4.6		9	5.6	5.4	4
	50-55	-39.3812	-36.5213	-38.599		-26.1915	-28.5919	-30.1356	-40.0567							50-55	6.8	10.2	4		8.8	4.6	5.8	4.4
	55-60	-39.6036	-36.7346	-41.2686		-24.3482	-28.7949	-30.6	-40.9183							55-60	5.2	8.6	1.4		7.6	4.2	4.6	2.4
		8a/2aSR/SR KI + GNE-4076 (n=6)															8a/2aSR/SR KI + GNE-4076 (n=6)
	Time (sec)	Cell 1	Cell 2	Cell 3	Cell 4	Cell 5	Cell 6									Time (sec)	Cell 1	Cell 2	Cell 3	Cell 4	Cell 5	Cell 6
-2 to -1 min interval	0-5	-46.2428	-50.2607	-47.1441	-46.5822	-46.333	-46.0411								-2 to -1 min interval	0-5	12.6	9	6.8	7.8	13.2	10.8
	5-10	-46.6711	-50.0876	-48.4081	-47.9393	-47.1891	-47.3833									5-10	11.4	8.2	4.6	6	12	9
	10-15	-46.2153	-50.4604	-47.9434	-48.0442	-46.4795	-46.7289									10-15	11.4	9	6.6	8	12.4	11.4
	15-20	-46.2481	-50.2072	-47.7505	-48.0499	-46.3057	-46.8942									15-20	11	8.2	6.2	6.2	11.6	9.2
	20-25	-46.1671	-49.8494	-47.6718	-46.9032	-45.6409	-46.4393									20-25	10.4	8.8	6.2	7.6	12	10
	25-30	-45.7488	-50.1052	-48.3178	-47.8301	-45.4839	-45.6228									25-30	9.8	8	5.4	7.4	11.4	10.4
	30-35	-46.0937	-50.415	-48.5445	-48.3206	-45.6143	-47.0981									30-35	10.8	9.6	6.2	9	12.8	12.6
	35-40	-46.0503	-49.491	-48.2926	-47.7461	-45.2529	-46.6254									35-40	10.4	8.4	5.8	7.6	11.8	10.8
	40-45	-46.188	-50.0521	-48.1005	-47.5422	-45.3925	-46.6372									40-45	10.8	9.8	7.6	9.6	13.2	12.8
	45-50	-45.9364	-49.996	-48.3373	-47.8932	-44.6802	-46.6966									45-50	10.8	9.6	6.4	8.4	13.8	11.8
	50-55	-46.3954	-50.2202	-47.9424	-48.1554	-45.0178	-46.3848									50-55	9.2	8.6	6	7	12	10.2
	55-60	-45.6936	-49.6571	-47.9053	-47.5174	-44.57	-45.9314									55-60	10.2	10.2	7.6	8.6	13.4	12.6
-1 to 0 min interval	0-5	-40.7199	-46.2352	-46.6025	-44.4868	-37.2134	-40.9544								-1 to 0 min interval	0-5	21.2	26.4	27	24.6	24.2	28
	5-10	-40.7398	-45.8687	-47.0402	-44.8299	-34.148	-39.0563									5-10	24	32	31.4	28.2	27.6	29.6
	10-15	-40.0661	-45.8222	-46.8632	-44.5763	-33.5496	-38.1859									10-15	21.8	30.4	29.8	25.6	23.4	25.6
	15-20	-39.8296	-46.2062	-47.1184	-44.7098	-32.1644	-37.7532									15-20	21.6	29.2	30	26	23.6	26.4
	20-25	-39.7284	-46.2318	-47.1043	-44.5805	-31.615	-37.0831									20-25	21.8	28.4	29.8	25.8	20.6	22.4
	25-30	-39.6178	-46.2276	-47.4642	-44.5385	-30.9796	-37.0724									25-30	21.6	28	29.2	25.2	18.8	22.2
	30-35	-39.6251	-46.2334	-47.5687	-44.4198	-29.8736	-36.3157									30-35	21.6	27.8	30.2	25.4	19.6	21.6
	35-40	-38.9884	-45.9838	-47.6784	-43.9727	-29.7951	-34.7545									35-40	21	27.4	29.6	24.8	17.6	18.4
	40-45	-38.2321	-45.6503	-47.4705	-43.8615	-29.3704	-34.8355									40-45	21	27.2	29.2	25.4	16.8	14.6
	45-50	-37.984	-45.2605	-47.4227	-43.2023	-28.1477	-33.7546									45-50	22	27.2	30	25.6	15.4	13.4
	50-55	-37.4753	-45.7155	-47.601	-43.2948	-27.6447	-33.6058									50-55	20.6	27.4	29.6	25.4	14.8	12.4
	55-60	-36.4441	-45.0346	-47.4596	-42.6238	-24.108	-31.5708									55-60	20.4	28.2	29.8	26	11.4	8.4
0 to 1 min interval	0-5	-41.4938	-45.3522	-48.7816	-44.0573	-40.31	-43.3343								0 to 1 min interval	0-5	5.6	13.4	5	6.8	7.6	7.2
	5-10	-46.4752	-51.7698	-48.1802	-47.2743	-40.7754	-45.1232									5-10	4.4	3.4	7.8	6.8	13.4	13
	10-15	-46.1533	-51.0462	-47.8516	-46.7492	-40.5305	-45.3102									10-15	4.6	2.8	8.4	6.2	12.8	11.2
	15-20	-46.1018	-51.3604	-48.0087	-46.9492	-40.467	-45.356									15-20	7.4	6	9.2	9	13.8	13
	20-25	-45.7147	-50.3439	-47.8197	-46.7637	-40.6497	-45.1435									20-25	6.8	6.2	9.2	8.4	12.6	12.6
	25-30	-45.7949	-50.8761	-47.9052	-46.9561	-40.601	-45.3232									25-30	6.6	6.8	8	8.2	12.2	11.8
	30-35	-45.7735	-50.6145	-47.9357	-47.0445	-40.9908	-45.8528									30-35	8	8.2	8.6	9.2	12.6	12.4
	35-40	-45.6078	-50.8104	-47.9312	-46.9748	-41.1028	-45.6029									35-40	10.4	7.8	9.8	9.4	14.4	13.4
	40-45	-45.4279	-50.3752	-47.8838	-47.0226	-41.406	-45.3327									40-45	8.8	7.8	9.2	8.2	13.8	13.4
	45-50	-45.878	-50.3057	-47.9572	-46.9357	-40.4255	-45.6792									45-50	9.8	9.4	9.6	9	14.4	14.6
	50-55	-45.5383	-50.3848	-48.0068	-47.0417	-41.7269	-45.7873									50-55	7	6.4	7.8	6.2	12.8	11.2
	55-60	-45.3084	-49.748	-47.3055	-47.2348	-40.5583	-45.8818									55-60	9.4	8	8.8	6.4	12	12.6
3 to 4 min interval	0-5	-44.8912	-49.52	-47.9046	-47.5315	-40.094	-46.3264								3 to 4 min interval	0-5	8.2	7.2	5.2	3.6	11.8	11
	5-10	-45.1943	-50.045	-47.7917	-47.4364	-41.3459	-46.89									5-10	9.2	7.4	7.2	4.8	15.2	12
	10-15	-45.6057	-50.0166	-48.2756	-47.8161	-41.947	-47.1187									10-15	9.2	8.2	6.4	4.4	15.2	14.2
	15-20	-45.1114	-49.962	-48.3003	-47.7458	-41.9073	-47.1135									15-20	10.2	8.2	8	4.8	15	14.2
	20-25	-45.2946	-50.2862	-48.5429	-47.3587	-41.9219	-46.7803									20-25	9.6	8.2	7.4	4	14.4	14
	25-30	-45.1545	-49.66	-47.9654	-46.8914	-40.7109	-46.5227									25-30	9.4	8.6	7.2	4.8	14.8	13.8
	30-35	-45.2621	-49.967	-48.2812	-47.7533	-41.2625	-46.6635									30-35	8.2	7.6	5.4	4	14.8	12.2
	35-40	-45.3296	-50.5373	-48.4851	-47.9179	-42.5276	-46.9295									35-40	10.4	8.8	7	4.4	15.8	14.4
	40-45	-45.2938	-49.6644	-48.2297	-47.2705	-41.8361	-45.9725									40-45	9.4	7.8	6.2	4.2	15	15.8
	45-50	-45.7331	-49.9004	-48.1084	-47.4786	-41.8043	-46.7052									45-50	10.4	9.8	7.6	5.6	16	15.2
	50-55	-45.1518	-49.9978	-48.7065	-47.9877	-41.4633	-46.6937									50-55	10.2	8.6	6.6	5	16	15.2
	55-60	-45.5427	-49.7989	-48.2926	-47.1421	-42.5916	-47.0188									55-60	8.4	7	5.4	3.8	14	12.4
		Scn2aSR/SR KI + GNE-4076 (n=12)															Scn2aSR/SR KI + GNE-4076 (n=12)
	Time (sec)	Cell 1	Cell 2	Cell 3	Cell 4	Cell 5	Cell 6	Cell 7	Cell 8	Cell 9	Cell 10	Cell 11	Cell 12			Time (sec)	Cell 1	Cell 2	Cell 3	Cell 4	Cell 5	Cell 6	Cell 7	Cell 8	Cell 9	Cell 10	Cell 11	Cell 12
-2 to -1 min interval	0-5	-47.434	-47.2686	-45.7795	-46.2265	-45.7154	-48.3996	-44.4554	-44.4985	-45.3404	-48.8554	-45.8084	-49.4523		-2 to -1 min interval	0-5	8	7.4	8.2	7.4	6.6	6.6	9.4	11.2	14.8	12.2	7	11.2
	5-10	-47.8675	-47.5924	-46.083	-46.8078	-45.3869	-48.3645	-44.6237	-45.1467	-45.3001	-51.2672	-46.955	-50.6401			5-10	7.6	5.8	7.2	5.8	5.8	5.6	8	9.4	14.6	16	5.6	9
	10-15	-48.0468	-47.1371	-45.9343	-46.1817	-44.894	-48.2282	-43.8357	-45.0094	-44.702	-50.1926	-46.1679	-49.8255			10-15	8.2	7	8.2	7.8	7.6	7	9.2	9.4	14	14.8	6.6	10.6
	15-20	-48.337	-47.1855	-45.6381	-46.5004	-45.2409	-48.6505	-43.9544	-45.0547	-44.8783	-50.5993	-46.3173	-50.1644			15-20	6.2	5.6	7	6	6.2	5.6	8.8	7.8	12.6	11.8	5.4	8.8
	20-25	-46.8969	-46.1825	-44.5844	-45.3873	-44.364	-46.9364	-43.2259	-44.2029	-44.0085	-49.4125	-46.0387	-49.2656			20-25	7.4	6.4	8.4	6.8	7	7	8.8	8.2	13.6	12.2	6	9.6
	25-30	-47.4394	-46.4299	-45.1965	-46.3326	-44.8908	-47.8617	-43.213	-43.86	-43.7575	-49.3962	-46.318	-49.3923			25-30	6.4	5.4	6.4	5.8	6.4	5.6	7.2	7.4	12.8	11	5.4	9.2
	30-35	-47.8111	-46.6736	-45.2914	-46.2699	-44.6335	-48.2602	-43.1301	-44.2729	-43.8388	-49.5242	-46.6595	-49.7086			30-35	7.8	6	8.4	6.2	8.8	7.4	8.6	8.6	13.2	12.2	5.8	11
	35-40	-47.7255	-45.5687	-44.7782	-45.7157	-43.937	-47.4613	-42.7578	-43.7959	-43.5489	-49.2185	-46.2716	-48.8025			35-40	6.8	5.8	6.8	6.2	7	6	7.4	6.8	13.2	11	5.4	10.6
	40-45	-47.8301	-45.6716	-44.1295	-45.3865	-43.9945	-47.2969	-42.2758	-43.3767	-43.5505	-48.9275	-45.8095	-49.2205			40-45	8.2	6.8	8.8	7.4	10	8.2	10.2	9	14.2	12.2	6.6	11
	45-50	-47.6986	-45.5341	-44.1533	-45.3641	-43.9588	-47.6537	-41.7665	-43.2369	-43.1109	-48.2142	-45.8462	-48.8462			45-50	7.4	6.6	8	7.2	8.8	7.2	9.6	8.6	13.2	11.8	6.4	11
	50-55	-47.0513	-45.4805	-44.2484	-45.0899	-44.2012	-47.3176	-42.6759	-42.8846	-42.8692	-48.5625	-45.0432	-48.8071			50-55	6	5	6	5	6.8	5.6	7.8	7.2	12	10	5	8.4
	55-60	-47.0623	-44.7362	-43.9341	-44.648	-43.4688	-46.7114	-42.2197	-42.6487	-42.2277	-47.8378	-45.2326	-48.1363			55-60	7.4	6	7	7.2	8.2	6.8	9.6	7.8	12.2	11.6	5.6	9.6
-1 to 0 min interval	0-5	-42.9156	-39.2959	-36.3058	-36.8465	-38.624	-42.2723	-34.8229	-35.5617	-35.2091	-44.1961	-42.7909	-45.5974		-1 to 0 min interval	0-5	24.6	20.6	23.4	21.4	27.2	24.2	20.6	20.2	25	24	23.4	24.2
	5-10	-42.9852	-36.8684	-34.6432	-35.819	-38.0681	-42.2847	-33.3413	-33.7535	-33.7761	-44.0078	-42.4553	-45.4625			5-10	29.8	25	25.2	23.4	30.6	28.2	22.2	22	27.2	27.2	26.6	27.6
	10-15	-41.9665	-34.2683	-32.325	-33.8866	-36.5374	-41.1006	-32.0421	-31.8672	-32.6276	-43.1486	-41.4038	-44.5215			10-15	26.8	22	22.6	19.6	27.8	25	18.8	18.8	22.6	24.8	23.8	24.4
	15-20	-41.6672	-33.6983	-31.5816	-33.1503	-35.7686	-41.3992	-31.1879	-30.9825	-31.6768	-42.6916	-41.1606	-44.585			15-20	26.4	21	22.8	18.6	25.6	24.4	18.8	17.8	23.2	23.4	23.6	24.2
	20-25	-41.186	-32.6362	-29.9769	-31.3284	-34.7254	-40.432	-29.2272	-29.5982	-31.2766	-41.8732	-40.2641	-43.6427			20-25	26.6	20.6	21.2	17.2	25	24.4	17.2	16.6	21.6	23.6	23.6	23.6
	25-30	-40.6018	-30.6629	-28.1872	-30.182	-33.509	-39.6301	-27.2541	-28.2402	-29.7765	-41.0512	-39.6043	-43.1273			25-30	25.2	18.6	19	16.4	23.6	23.2	15	15.4	19.8	22.4	22.2	22.8
	30-35	-39.9702	-30.4124	-28.0526	-28.1976	-32.3754	-38.8743	-26.1941	-26.8681	-29.6219	-40.3818	-38.9366	-42.3575			30-35	25.2	18.6	19.4	15.8	23.2	23.6	14.8	15.4	18.4	22.4	22.8	22.4
	35-40	-39.0603	-29.3368	-26.1764	-27.2827	-30.4153	-37.0093	-23.9684	-26.1392	-27.6473	-39.6053	-38.4676	-41.1288			35-40	24.6	18.2	18	14	20.8	22.2	13.8	14.8	18.2	21.8	21.6	21.6
	40-45	-38.4207	-27.8015	-25.1094	-26.5596	-28.6313	-35.8859	-22.9357	-24.965	-27.1891	-38.742	-37.4138	-40.1194			40-45	24.4	17.2	16.6	12.8	20.6	21.2	13	14	16.4	21.4	21.6	21
	45-50	-37.7686	-27.4988	-23.5229	-24.8487	-28.0937	-35.1244	-20.5	-22.9869	-25.6742	-37.9635	-37.0976	-39.5525			45-50	24	16.6	15.8	11.6	18.8	20.8	12	13.6	14.8	22	22	21.6
	50-55	-36.913	-26.9793	-22.884	-23.08	-26.5345	-34.0748	-19.0217	-21.3745	-25.4039	-37.479	-36.7528	-39.5849			50-55	23	16.4	15.8	11.8	18	20.2	12.6	12.4	14.6	20.4	21	20.6
	55-60	-35.9134	-25.2088	-20.6435	-21.68	-25.7355	-32.3834	-17.615	-20.6275	-22.8019	-36.0999	-35.4869	-38.2583			55-60	22.6	16	14.4	9.4	15.8	15.2	9.8	10.6	13.4	20.2	21	20.2
0 to 1 min interval	0-5	-40.5388	-29.9428	-33.1282	-35.1855	-30.1435	-42.7805	-30.3226	-28.91	-33.8431	-35.3908	-36.6178	-41.3959		0 to 1 min interval	0-5	3.4	5.2	4.4	3.4	7.2	2.6	5.2	4.8	7.2	16.4	5.4	3.6
	5-10	-45.1067	-37.9	-38.4114	-39.3339	-34.9243	-42.9413	-36.32	-35.9236	-37.7275	-39.7213	-41.0938	-44.6347			5-10	3.8	4	5.4	4.4	8	4.2	7	5.6	9.8	7	3	3.8
	10-15	-43.9117	-36.9626	-38.3229	-38.9121	-34.8563	-41.5038	-36.3255	-36.5598	-38.7162	-43.4508	-40.3578	-43.8858			10-15	4	3.6	5.6	4.4	8.2	4.6	7	5.4	9.2	6.2	3	4.6
	15-20	-44.0602	-38.3226	-39.3033	-39.0722	-35.3432	-42.8837	-35.5145	-36.9337	-38.7813	-43.1493	-41.6142	-44.5229			15-20	6.8	5.2	6.4	6	9.6	6.2	7.8	7	10	8	4.6	6.8
	20-25	-44.0398	-38.1075	-39.2499	-40.5349	-35.201	-42.4355	-36.035	-36.9587	-39.0625	-43.2092	-41.0717	-44.268			20-25	5.8	4.6	5.4	5.2	9.2	5.6	7	6.2	9	7.8	4.2	6
	25-30	-43.916	-37.9389	-39.3684	-39.6408	-34.577	-41.8631	-35.7063	-37.5121	-38.5329	-42.9642	-40.8343	-44.4213			25-30	6	4.8	6	5	8.8	5.6	7	6.4	9.6	8	4	6.2
	30-35	-45.0229	-38.594	-40.0293	-40.3493	-35.9306	-43.0782	-36.2075	-37.8653	-39.0302	-43.7037	-41.6711	-44.5253			30-35	5.6	4.2	6	4.6	8.4	5.2	8.4	6.8	10.2	8.4	4.2	6.8
	35-40	-44.9435	-38.9413	-40.0237	-40.8938	-35.3623	-42.706	-36.2504	-37.5839	-38.9936	-43.5012	-41.6867	-44.5786			35-40	6.4	5	6.2	5.6	9.2	6.4	7.8	7.2	10.8	8.8	4.8	7.4
	40-45	-44.9049	-37.9056	-40.1772	-40.2094	-34.7291	-42.7667	-36.8265	-37.6349	-39.2037	-43.5547	-41.2832	-44.3824			40-45	6.8	5.2	6.2	5.4	8.6	5.8	7.6	6.8	10.8	8.8	4.6	6.8
	45-50	-44.8512	-38.1076	-40.396	-40.3284	-35.6191	-42.6819	-37.0707	-37.1417	-39.3711	-43.7157	-41.1217	-44.7755			45-50	7.4	4.4	6.4	6	9.2	6.2	8.8	7.2	11.4	9.6	4.6	8
	50-55	-45.179	-39.2252	-40.5389	-41.1137	-36.4288	-43.6128	-37.4911	-37.6007	-39.1895	-43.8625	-42.497	-44.9591			50-55	5.4	3.6	5	4	7	5	6.6	6	9.4	8	3.6	6.2
	55-60	-44.9587	-38.79	-40.6136	-40.9014	-34.88	-43.1148	-36.1485	-37.3079	-39.0799	-43.8477	-41.7614	-44.6327			55-60	6.4	4	5.4	4.8	8.2	5.6	7.4	6.4	10.2	9.2	3.8	6.4
3 to 4 min interval	0-5	-45.3091	-38.7256	-40.419	-41.2158	-34.5836	-42.008	-37.6032	-35.9128	-39.3648	-44.618	-42.049	-45.6464		3 to 4 min interval	0-5	5	3.6	5.4	3.8	7.4	5	6.6	5.4	6.4	7.4	3.4	4.8
	5-10	-45.4665	-38.0942	-40.2554	-41.08	-34.8584	-41.8738	-38.0685	-36.8404	-38.5676	-44.5861	-42.0111	-45.5729			5-10	6.2	4.8	6.4	4.8	8.6	5.8	7.8	6.6	9	9	4.2	6
	10-15	-45.6919	-38.3092	-40.5313	-41.7215	-34.9913	-42.4296	-39.0219	-37.2489	-38.8056	-45.0238	-41.974	-45.9888			10-15	5.4	4.2	6	4.4	8.4	5.4	7.2	6	9.8	8.8	4.2	5
	15-20	-45.6723	-38.7345	-40.7339	-40.9113	-35.0944	-42.2	-38.6985	-37.8338	-38.9991	-44.147	-42.2165	-46.2224			15-20	6.4	5.6	6.8	5.8	8.8	6.2	8.2	6.2	10.8	9	5.4	6.2
	20-25	-45.8554	-38.7832	-40.7701	-41.3494	-34.9736	-42.4253	-37.7532	-36.4002	-38.7068	-44.2664	-42.2676	-46.7056			20-25	5.8	4.2	5.8	4.8	9	6	7.8	6.2	10.6	8.8	4.4	5.2
	25-30	-45.1553	-38.2861	-39.6302	-40.9544	-34.5424	-41.776	-37.8568	-36.5381	-38.3491	-44.373	-41.3167	-45.5622			25-30	6	4.6	6.4	4.8	8.4	5.6	7.4	6.4	10.6	8.4	4.8	5.4
	30-35	-45.7396	-38.0667	-40.2192	-41.3694	-33.6843	-42.0374	-38.2842	-37.4673	-37.8294	-44.5367	-41.9717	-46.1213			30-35	6	4.2	5.2	4.8	8.4	5.6	6.4	6	10.2	7.6	4.8	5
	35-40	-45.9445	-38.5446	-40.5139	-41.4725	-34.0464	-42.4617	-39.0135	-38.8917	-38.557	-44.9343	-42.3548	-46.5195			35-40	6.8	4.6	7.2	5	8.8	6.2	7.6	7.2	11.4	9.4	5.6	5
	40-45	-45.1662	-38.4077	-39.61	-41.3719	-33.4985	-41.1084	-38.4501	-36.4724	-38.1696	-44.5694	-42.141	-45.601			40-45	6	4	5.6	4.6	8.8	4.6	6.6	5.8	11	8.2	4.2	4.2
	45-50	-45.5567	-37.5003	-40.1275	-42.2104	-33.6896	-41.8739	-38.8195	-36.8224	-38.4064	-44.7181	-41.7612	-45.8331			45-50	7.2	4.8	6.8	6	10.4	6.6	8.2	6.6	12	9.2	5.4	6
	50-55	-46.0374	-38.2122	-40.2024	-42.0699	-34.2711	-41.9082	-38.5217	-36.6004	-38.2244	-44.5886	-42.1156	-46.1414			50-55	6.6	4.8	6.6	5.8	9.6	6	8.6	6.4	11.6	9.2	5.4	5.8
	55-60	-46.2689	-38.4533	-40.2711	-42.3824	-33.1778	-41.7461	-38.5677	-38.2606	-37.9041	-44.354	-42.1874	-46.3869			55-60	4.8	3.4	4.8	3.4	9.2	4.6	6.4	4.8	10	7.6	3.8	4.8
		Scn8aSR/SR KI + GNE-4076 (n=12)															Scn8aSR/SR KI + GNE-4076 (n=12)
	Time (sec)	Cell 1	Cell 2	Cell 3	Cell 4	Cell 5	Cell 6	Cell 7	Cell 8	Cell 9	Cell 10	Cell 11	Cell 12			Time (sec)	Cell 1	Cell 2	Cell 3	Cell 4	Cell 5	Cell 6	Cell 7	Cell 8	Cell 9	Cell 10	Cell 11	Cell 12
-2 to -1 min interval	0-5	-47.3697	-45.9575	-44.5972	-45.2633	-46.4813	-48.8983	-47.0524	-45.739	-45.6104	-45.3148	-46.1138	-48.3143		-2 to -1 min interval	0-5	8.8	14.2	8.6	6.6	14.2	6.4	13	9.2	8.2	7.4	7.8	11
	5-10	-48.1677	-46.6226	-44.6711	-45.411	-47.9632	-49.5497	-47.5538	-46.6936	-45.9487	-45.8715	-46.0939	-49.6231			5-10	7.6	14.8	8.8	5.2	12.8	5.2	12	8.6	6.6	5.8	7.2	9.8
	10-15	-47.8687	-46.1945	-44.2785	-45.41	-46.6164	-49.3135	-47.4152	-45.3911	-45.9849	-45.7925	-45.4733	-48.998			10-15	9.4	13.8	10	7.2	15	7.4	12.4	11.6	7.4	6.6	9.6	11.4
	15-20	-48.0034	-46.0544	-44.0068	-45.0595	-46.6921	-49.3271	-47.446	-46.1247	-45.9965	-46.0154	-46.25	-48.7613			15-20	8.6	14.4	9.6	5.4	13	5.6	11.8	9.4	6.8	5.2	8	10
	20-25	-47.0503	-46.1341	-43.6047	-43.8329	-45.9123	-48.1025	-46.9251	-44.2619	-45.0662	-44.7237	-44.7206	-48.1115			20-25	9.8	15	10.4	6.6	14.2	7	13.2	11	8	7.2	9.2	11.2
	25-30	-46.8313	-46.052	-43.414	-44.4247	-46.8301	-48.8283	-47.0989	-44.7823	-45.6697	-45.663	-45.234	-48.642			25-30	9.4	14	10	6	12.4	5.8	12.2	9.8	7	5.8	8	10.6
	30-35	-47.6293	-46.2671	-43.7119	-44.777	-47.086	-49.5724	-47.1852	-45.4828	-45.9182	-46.0586	-45.6389	-49.2588			30-35	10.2	15	12.2	7	16.2	6.8	13.4	11.6	9	5.6	10	11.2
	35-40	-46.9486	-46.0255	-43.3709	-44.7379	-46.6864	-49.0715	-47.0958	-44.9805	-45.3393	-45.6384	-45.141	-48.28			35-40	9.8	14	11.6	6.4	14	6.6	13	11	7.4	6	9	11.4
	40-45	-47.1731	-46.0875	-43.1451	-44.3827	-46.9985	-48.5828	-46.9408	-44.862	-45.2645	-45.1954	-45.2053	-48.4821			40-45	11	15.8	13.2	8.4	17.2	8.2	14.2	12.6	9.8	7	10.6	12.8
	45-50	-46.6079	-45.9704	-42.7058	-44.8113	-46.0572	-49.3287	-46.5685	-44.6409	-45.6139	-45.5867	-45.0371	-48.9652			45-50	10.6	15.2	13	7.8	16	7.8	14.6	13	8.8	7.2	11.2	12.4
	50-55	-46.5546	-45.7737	-43.1138	-44.1153	-46.3008	-48.6587	-47.1498	-44.8088	-45.2772	-44.3427	-44.9413	-48.4078			50-55	9.2	13.8	11.6	6.2	15.6	6	12.6	11.6	7.2	6	9	11
	55-60	-46.3617	-45.6348	-42.7617	-44.0887	-46.0768	-48.4946	-46.6667	-44.7495	-44.6816	-45.3671	-44.5925	-48.2248			55-60	11	15.4	13	8.2	16.2	7.2	13.6	13.2	8.6	6.4	11.8	13.4
-1 to 0 min interval	0-5	-43.5377	-40.0208	-36.2704	-41.1282	-43.3927	-44.1914	-43.1565	-38.73	-40.8765	-42.4135	-39.3333	-45.8805		-1 to 0 min interval	0-5	18.6	23.8	23.2	21.4	25.2	27.6	23.2	22.8	25.4	28.2	25.6	27.4
	5-10	-41.9145	-39.9937	-35.8989	-40.6464	-43.2902	-43.4019	-43.1613	-38.3449	-40.5433	-42.0974	-38.8002	-45.6591			5-10	29.6	26.2	26.6	27	29.6	32.4	26.8	24.8	30.6	32	29.6	31.4
	10-15	-41.3819	-39.3233	-35.3211	-39.9004	-42.4521	-42.2485	-42.5758	-38.2161	-39.7648	-41.6209	-38.2148	-45.1847			10-15	26.8	23	24.4	24.8	26.8	30	24.8	22	28.6	30	25.6	29.8
	15-20	-40.8761	-39.1381	-34.8734	-40.1967	-42.648	-42.3967	-42.5419	-38.1167	-39.6315	-41.5578	-38.3046	-45.1131			15-20	25	23.2	24.4	26	26.4	29.8	24.8	22.8	28.2	29.8	25	28.8
	20-25	-41.1529	-37.8145	-34.2524	-39.7734	-41.9284	-42.0252	-42.0883	-37.6448	-38.9732	-41.3687	-37.422	-44.708			20-25	25.4	22.8	22.2	26.2	26.6	29.6	25.4	21.2	28.8	28.4	24.2	29.4
	25-30	-40.4971	-37.2413	-33.6377	-39.3779	-41.7449	-41.3858	-42.2154	-37.7189	-38.6697	-40.9139	-37.4133	-44.3822			25-30	22.6	20.4	20	25.4	25.6	27.8	24.8	19.2	28	29	20.6	29
	30-35	-40.3855	-36.6122	-33.4832	-39.4079	-41.8332	-41.7775	-41.9249	-37.5111	-38.5108	-40.856	-37.6384	-43.6612			30-35	22.6	19.6	19.4	25.4	25.4	28.2	25	19.6	29.2	30	19	29.2
	35-40	-39.7637	-35.2181	-32.7861	-38.6499	-40.6875	-40.9195	-41.7782	-36.9522	-37.763	-40.4368	-37.3554	-43.3058			35-40	21.4	18	16.6	25.8	23.2	26.6	24.2	17.8	28.6	28.2	14	27.8
	40-45	-39.7235	-33.8464	-31.3879	-38.7256	-40.9858	-40.6717	-41.6572	-36.2227	-37.6513	-40.0161	-37.1792	-43.1172			40-45	19.8	15.6	15.8	26.2	20.8	25.4	25	16.6	28.6	29	14	28.6
	45-50	-39.1218	-33.496	-30.6359	-38.0003	-40.0117	-40.2742	-41.0961	-33.9469	-36.9161	-39.7842	-36.3015	-42.7774			45-50	19	13.2	11.6	26	20.8	25.6	24.8	15.2	28.4	28.6	11	28.6
	50-55	-39.8135	-32.8665	-29.9317	-38.1603	-39.8573	-39.8111	-41.436	-34.3075	-37.2178	-39.8011	-36.6812	-42.639			50-55	20	10.4	9	26	19.4	24.8	24.4	9.4	27.8	29.2	9.4	28.2
	55-60	-38.2537	-30.4343	-31.4285	-37.6834	-40.0097	-39.8372	-40.9636	-33.721	-36.682	-39.2027	-36.0522	-41.9933			55-60	18.6	7.2	5.8	25.4	16.6	23.4	24.4	9.4	28.4	30.4	5.8	28.2
0 to 1 min interval	0-5	-42.9919	-42.7854	-38.8046	-41.2459	-44.4536	-41.4879	-46.3818	-42.3849	-43.0248	-41.7742	-43.0409	-44.1847		0 to 1 min interval	0-5	8.4	5.4	8	8.4	12.2	8.8	7.4	9.4	4.2	6	8	12.4
	5-10	-46.1686	-44.1024	-39.2464	-42.3416	-43.3872	-46.9553	-46.5427	-42.0643	-42.8267	-43.6349	-42.6215	-46.1718			5-10	10.2	10.2	15.8	11.4	19.2	6.8	9	15.4	7.2	6.8	15.4	12.8
	10-15	-46.4779	-44.1497	-39.9902	-42.4906	-43.8104	-46.4843	-46.5597	-42.9393	-42.8104	-43.1483	-42.8987	-45.9932			10-15	9.6	10.4	13.6	10	17.8	5.6	8.8	14	6.4	7.4	14.2	13
	15-20	-46.2859	-43.6016	-39.5042	-42.4133	-43.5257	-46.9591	-46.204	-42.503	-42.9833	-43.0808	-42.2657	-46.506			15-20	11.8	15	15	11.6	19.8	7.6	11	15.8	8	8.2	16.8	14.6
	20-25	-45.9945	-43.1103	-39.8208	-42.3528	-44.2205	-46.5733	-46.2282	-42.9107	-42.9112	-42.7375	-42.6144	-45.8671			20-25	11.2	14.2	13.4	10.4	17.8	7	10.6	13.8	6.8	7.6	15.4	13.8
	25-30	-45.7769	-43.5161	-39.7152	-42.2851	-43.6696	-47.212	-46.079	-42.5074	-43.404	-43.2882	-42.0224	-45.7029			25-30	10.6	15.2	13.8	9.2	18.6	6.2	10.8	14	7	8.8	15.2	13.6
	30-35	-46.7353	-44.0584	-40.1573	-42.7535	-43.9543	-47.7123	-46.4343	-42.875	-43.0465	-43.7384	-42.5372	-46.3262			30-35	11.4	15.6	14.4	10.8	18.2	6.6	11	14.8	8	8.6	15.8	14.2
	35-40	-46.4465	-43.6814	-39.9649	-42.5054	-43.5015	-47.7683	-46.0872	-42.8978	-42.8395	-43.8119	-42.3607	-45.7706			35-40	13	17.6	15.2	11.2	19	6.6	12.2	15	8.6	8.2	16	15.6
	40-45	-46.4231	-43.7874	-40.3844	-42.2113	-43.8864	-47.5367	-46.0153	-43.2508	-42.9781	-43.8968	-42.5289	-45.9171			40-45	12.8	16.2	14.2	10.6	18.2	7.2	12.2	14.2	8.6	8	15.8	14.4
	45-50	-46.3098	-43.7895	-39.9157	-42.3742	-44.0779	-47.3553	-46.0921	-42.5055	-42.6036	-43.2192	-42.1695	-46.0168			45-50	13.6	17.4	15.2	11.4	18.4	7.4	12	15.2	9.2	8.8	17.4	16.2
	50-55	-47.0303	-43.9248	-40.1503	-42.7733	-43.3833	-48.5469	-46.342	-43.1968	-43.1313	-43.6735	-42.7313	-46.2146			50-55	9.2	16	13	8.2	17.2	4.8	10	13	6.6	6.4	14.4	13.4
	55-60	-46.4694	-43.6938	-39.7942	-42.2439	-42.7172	-47.6561	-45.9283	-42.508	-42.4878	-43.2541	-42.5992	-45.9873			55-60	10.6	16.2	13.6	9.8	18.4	6.2	11.2	13.8	8	7.4	15.6	15.2
3 to 4 min interval	0-5	-47.0744	-44.9359	-40.8494	-41.5964	-42.8101	-47.6841	-45.6592	-41.6899	-41.942	-42.2069	-42.019	-44.6212		3 to 4 min interval	0-5	8.8	14	11	7.8	16.2	4.2	10.6	12	6.6	6.2	13	12.6
	5-10	-47.6974	-45.3888	-41.3184	-41.933	-42.7738	-47.603	-46.1634	-42.5461	-42.0168	-42.5093	-42.6468	-44.7389			5-10	9.4	16.4	12.4	8.6	20.8	5.8	12.6	14.2	7.8	7.6	15	14.4
	10-15	-47.7303	-45.4397	-41.5333	-42.5545	-43.1874	-48.4833	-46.4918	-42.9077	-42.2662	-42.7072	-42.8873	-44.9453			10-15	10.6	16.6	13.2	9	20	5.2	12.8	13.8	8.2	7	15.8	14.4
	15-20	-47.6371	-45.3667	-41.1731	-42.8028	-42.7003	-47.9335	-46.0035	-41.9949	-42.3757	-42.4733	-42.5667	-44.103			15-20	10	17	13.2	9.2	18.4	6.2	13.4	15	8	7.6	15.6	15.2
	20-25	-47.962	-45.6994	-41.124	-42.643	-42.74	-47.8772	-46.3679	-42.7588	-42.496	-42.7367	-42.8912	-44.6089			20-25	8.8	16.6	12.8	8.4	19.8	5.2	12.6	13.4	7.6	6.4	15.6	14.6
	25-30	-47.1327	-45.0838	-41.0563	-41.6525	-42.5492	-47.4855	-46.0372	-42.0722	-41.8545	-42.4442	-41.9641	-44.6289			25-30	10.6	17.4	13	9.2	19.8	5.6	13.2	13.6	8.2	7.6	16.4	14
	30-35	-47.1859	-45.5532	-41.688	-41.7132	-42.4504	-47.9651	-46.1947	-41.645	-42.1361	-42.5929	-41.9898	-44.7282			30-35	9.8	16.4	12	8.2	18	5	11.6	13.2	7.2	6.6	15	13.2
	35-40	-47.633	-45.295	-41.8142	-42.5232	-43.4444	-48.6835	-46.2675	-41.8713	-42.6928	-42.776	-41.8342	-44.7644			35-40	11	18.4	13.6	9.6	20.4	5	13.4	15.2	9.2	8	17.2	15
	40-45	-47.392	-45.2768	-41.3012	-41.4059	-42.7472	-48.0638	-46.4585	-42.4773	-42.0983	-42.7333	-41.7859	-44.1978			40-45	10	17	12.4	8.2	19.2	4.6	12.8	14	7.2	7.2	15	14.4
	45-50	-47.5464	-45.4302	-41.9292	-42.1627	-42.9109	-47.8241	-46.1667	-42.4715	-42.2446	-41.9355	-42.2431	-44.5175			45-50	11.2	17.6	14	10.2	21.2	6	14.2	15.2	9.2	8.6	17.2	15.6
	50-55	-47.7707	-45.4667	-40.4832	-42.0449	-42.3789	-48.3943	-45.8807	-41.8566	-42.3554	-42.6728	-41.9308	-44.6278			50-55	11.6	18.6	13.6	9.6	19.6	5.8	14	14.8	7.8	7.8	16.6	15.2
	55-60	-47.9119	-45.6196	-42.0607	-41.8202	-42.4839	-48.1394	-46.5786	-42.4222	-42.6193	-42.4587	-42.6311	-44.8767			55-60	9.4	15.2	11.4	7.6	19	4.4	11.8	13.4	5.8	6.2	14	13.4

## Sheet: Figure 7D
	D Threshold (mV) - seizure like activity
	Wildtype no drug (n=7 cells)	Wildtype + GNE-4076 (n=8 cells)	Scn8aSR/SR KI + GNE-4076 (n=12 cells)	Scn2aSR/SR KI + GNE-4076 (n=12 cells)	8a/2aSR/SR KI + GNE-4076 (n=6 cells)
	10.632	20.9623	8.10798	11.1489	9.24948
	14.7989	24.848	15.2005	19.5274	4.62251
	6.36499	18.2109	11.3333	23.2906	0.445621
	4.53057	20.9351	6.40528	22.968	4.89357
	8.85395	18.507	6.06702	17.7333	20.462
	10.8986	22.5758	8.65743	14.328	14.3606
	5.96119	20.0778	5.70306	24.6048
		14.2586	11.0285	22.0212
			7.99953	19.4258
			6.16441	11.7379
			8.54032	9.7457
			6.23144	9.87797
	D Threshold (mV) - recovery
	Wildtype no drug (n=7 cells)	Wildtype + GNE-4076 (n=7 cells)	Scn8aSR/SR KI + GNE-4076 (n=12 cells)	Scn2aSR/SR KI + GNE-4076 (n=12 cells)	8a/2aSR/SR KI + GNE-4076 (n=6 cells)
	1.65614	7.84035	-0.342282	1.94474	0.840491
	1.00628	8.8459	0.684865	7.94527	0.120522
	1.03239	7.09581	2.2542	4.70556	-0.210461
	-0.0105235	20.3317	2.62184	4.31678	0.182822
	1.63143	12.2221	3.87704	10.2729	4.04561
	0.696379	11.5824	0.96595	5.77446	-0.187635
	1.63773	5.60471	0.902369	4.78959
			2.98362	6.89157
			3.27279	5.62847
			2.94357	4.77439
			3.08766	4.00846
			4.0592	3.32999

## Sheet: Figure 7E
	D Instantaneous Frequency (Hz) - seizure like activity
	Wildtype no drug (n=7 cells)	Wildtype + GNE-4076 (n=8 cells)	Scn8aSR/SR KI + GNE-4076 (n=12 cells)	Scn2aSR/SR KI + GNE-4076 (n=12 cells)	8a/2aSR/SR KI + GNE-4076 (n=6 cells)
	11.6	6.2	7.6	15.2	10.2
	10.6	0.6	-8.2	10	18
	16.4	-5.2	-7.2	7.4	22.2
	29	2.6	17.2	-4.2	17.4
	12	-6	0.4	7.6	-2
	7.4	-10.4	16.2	8.4	-4.2
	13.6	-8.4	10.8	0.2
		12.4	-3.8	2.8
			19.8	1.2
			24	8.6
			-6	15.4
			14.8	10.6
	D Instantaneous Frequency (Hz) - recovery
	Wildtype no drug (n=7 cells)	Wildtype + GNE-4076 (n=7 cells)	Scn8aSR/SR KI + GNE-4076 (n=12 cells)	Scn2aSR/SR KI + GNE-4076 (n=12 cells)	8a/2aSR/SR KI + GNE-4076 (n=6 cells)
	4.06667	-2.98333	0.483333	-1.26667	-1.33333
	-2.13333	-2.2	2.15	-1.75	-0.833333
	1.7	-2.6	1.71667	-1.45	0.35
	0.8	-6.25	2.05	-1.73333	-3.31667
	0.933333	-7.18333	4.63333	1.38333	2.36667
	-1.03333	-8.36667	-1.41667	-0.916667	2.73333
	1.65	-1.83333	-0.25	-1.31667
			2.93333	-2.31667
			-0.166667	-3.08333
			0.883333	-3.68333
			6.25	-1.26667
			2.98333	-4.71667
